# Supplementary material for: Π-Stacking in Heterodimers of Propargylbenzene with (Fluoro)phenylacetylenes
Source: PubMed Central journal article supplement — ACS Omega. 2021 Jul 1;6(27):17720–5. doi: 10.1021/acsomega.1c02385 (PMC8280671; doi:10.1021/acsomega.1c02385), 2021-07-01
Supplement: ao1c02385_si_001.pdf [file ao1c02385_si_001.pdf]

## Supporting Information (SI)

For

### $\Pi$ -Stacking in Heterodimers of Propargylbenzene with (Fluoro)Phenylacetylenes

Aniket Kundu, Saumik Sen and G. Naresh Patwari

Department of Chemistry, Indian Institute of Technology Bombay, Powai, Mumbai  
400076, India

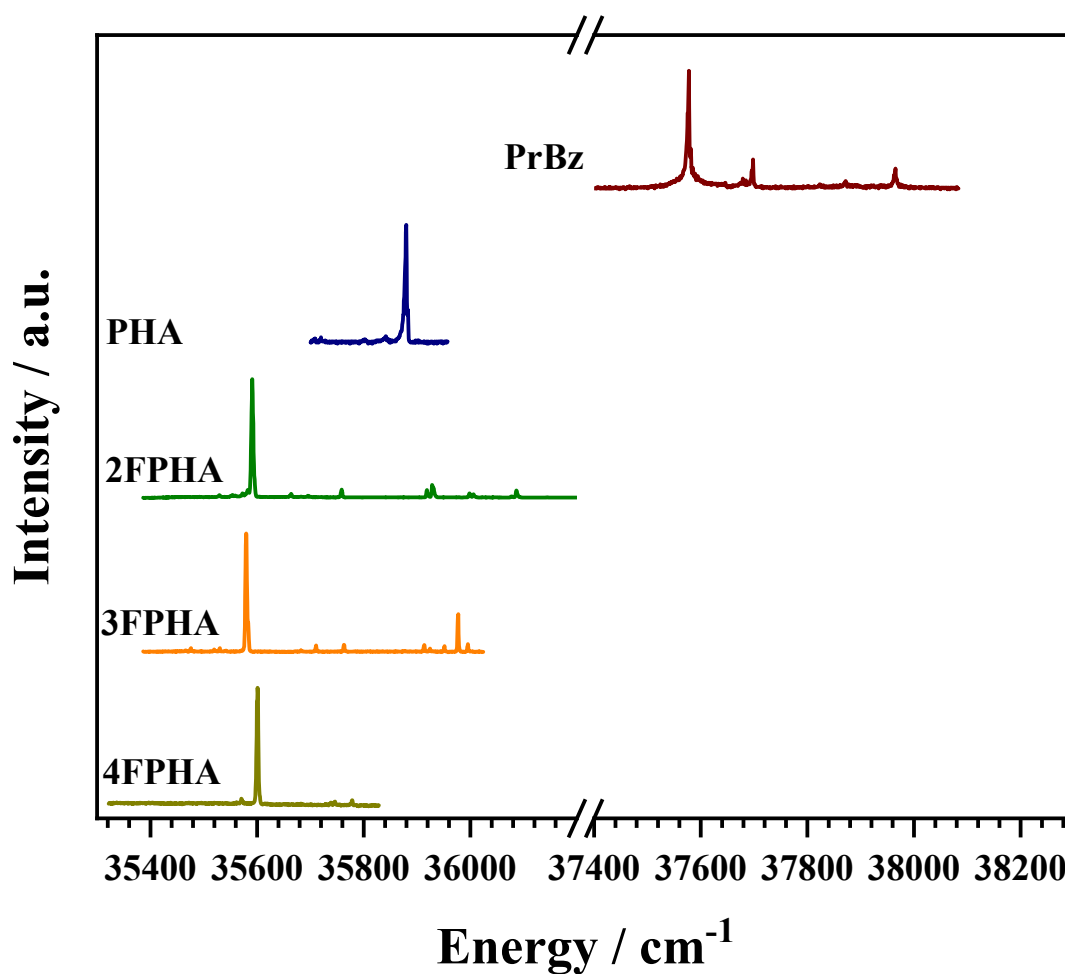

**Figure S1.** The electronic (1C-R2PI) spectra of monomers PrBz, PHA, 2FPHA, 3FPHA, and 4FPHA. The most intense band in each case is the band-origin ( $0_0^0$ ) excitation of the  $S_0 \rightarrow S_1$  transition.

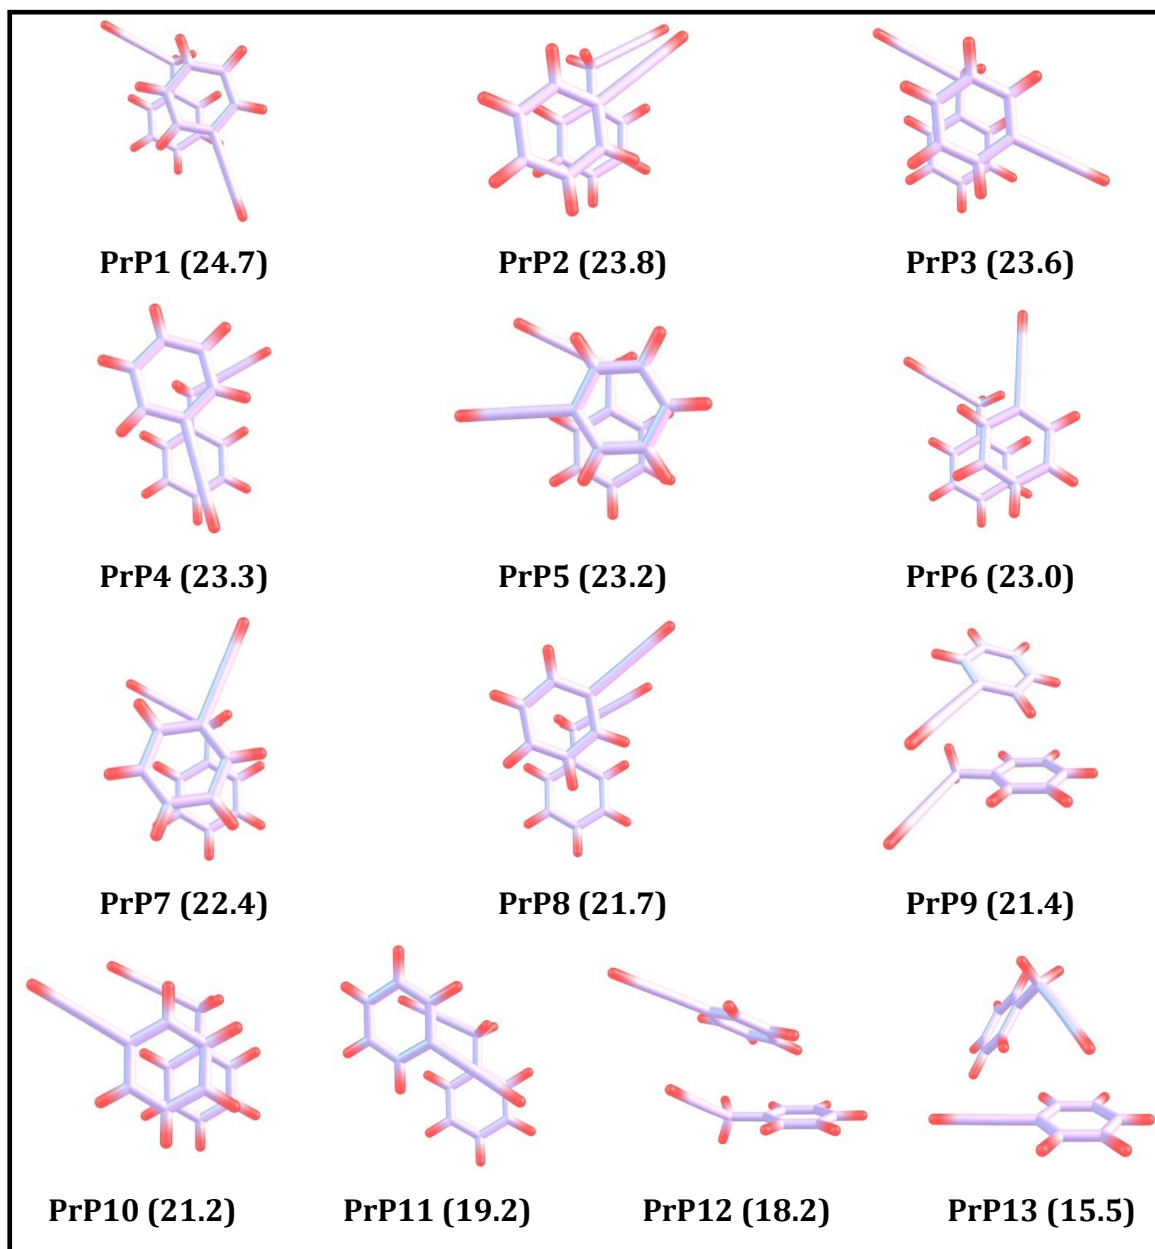

**Figure S2.** Structures of PrBz-PHA dimer optimized at M06-2X/aug-cc-pVDZ level. Structures are arranged in descending order with ZPE and BSSE corrected absolute value of stabilization energy ( $\text{kJ mol}^{-1}$ ) (see Table S1).

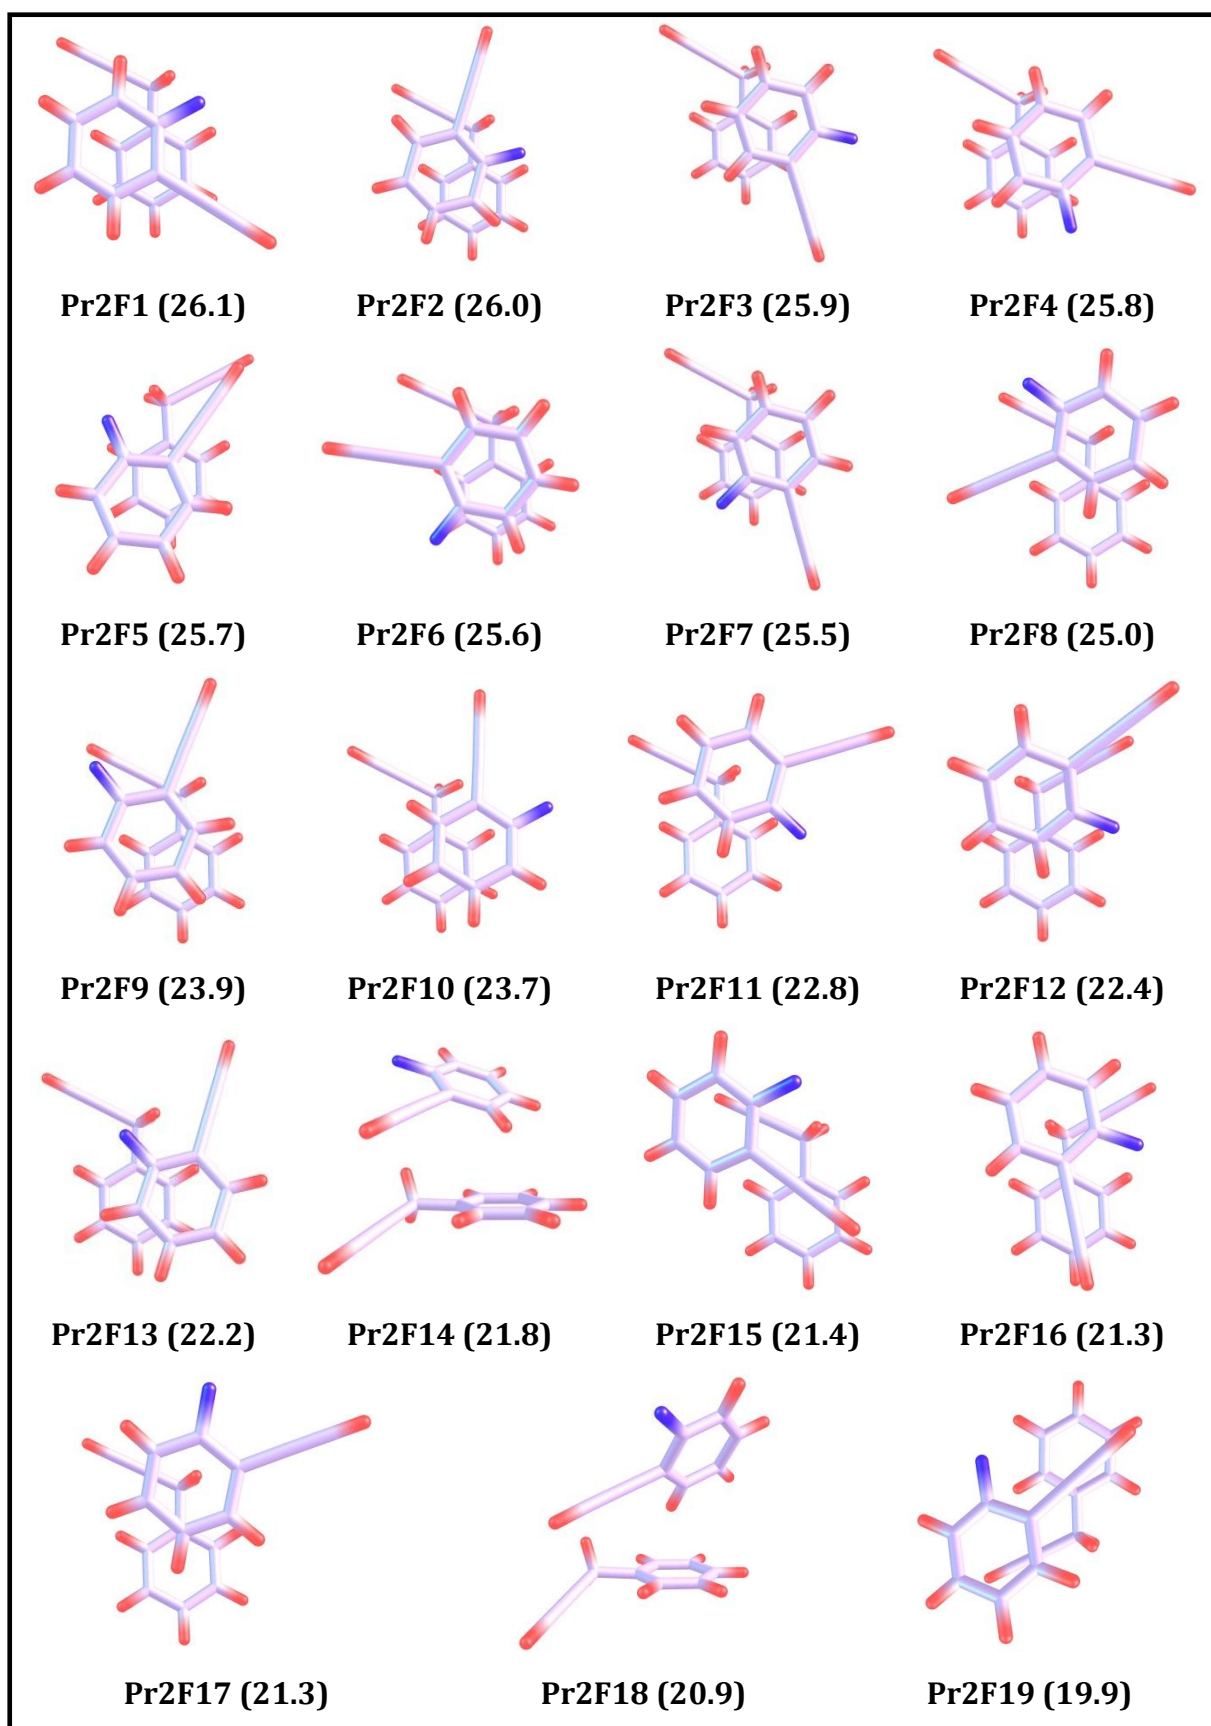

**Figure S3.** Structures of PrBz-2FPHA dimer optimized at M06-2X/aug-cc-pVDZ level. Structures are arranged in descending order with ZPE and BSSE corrected absolute value of stabilization energy ( $\text{kJ mol}^{-1}$ ) (see Table S2).

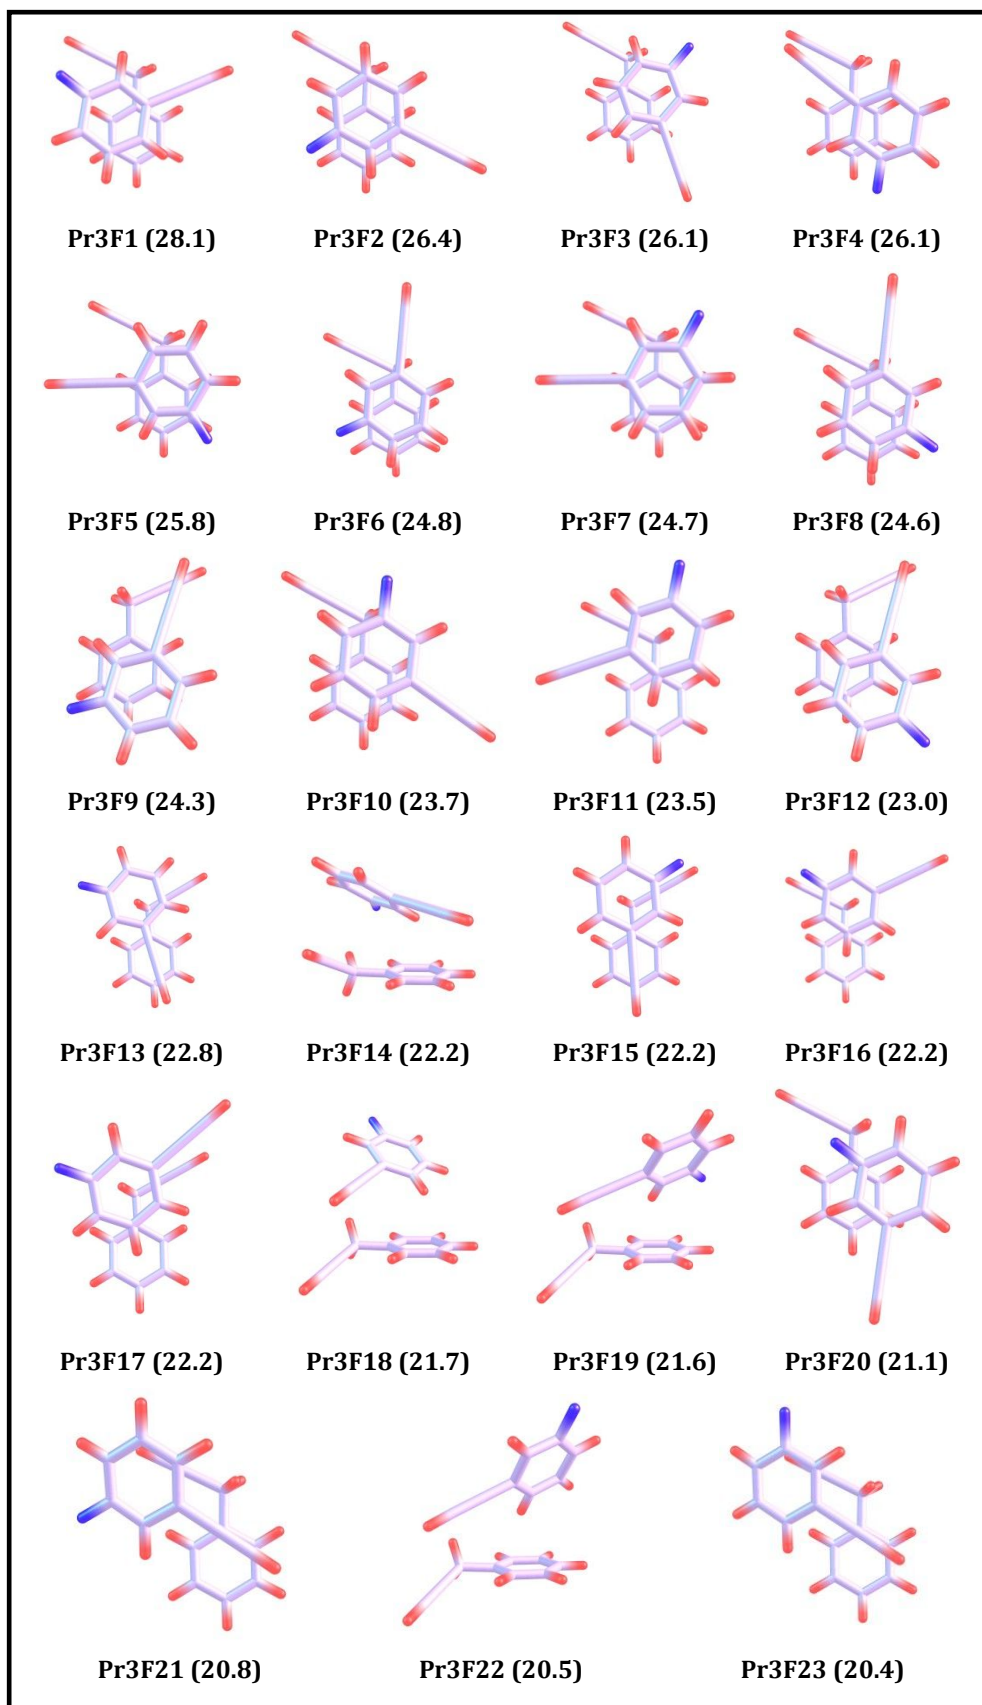

**Figure S4.** Structures of PrBz-3FPHA dimer optimized at M06-2X/aug-cc-pVDZ level. Structures are arranged in descending order with ZPE and BSSE corrected absolute value of stabilization energy ( $\text{kJ mol}^{-1}$ ) (see Table S3).

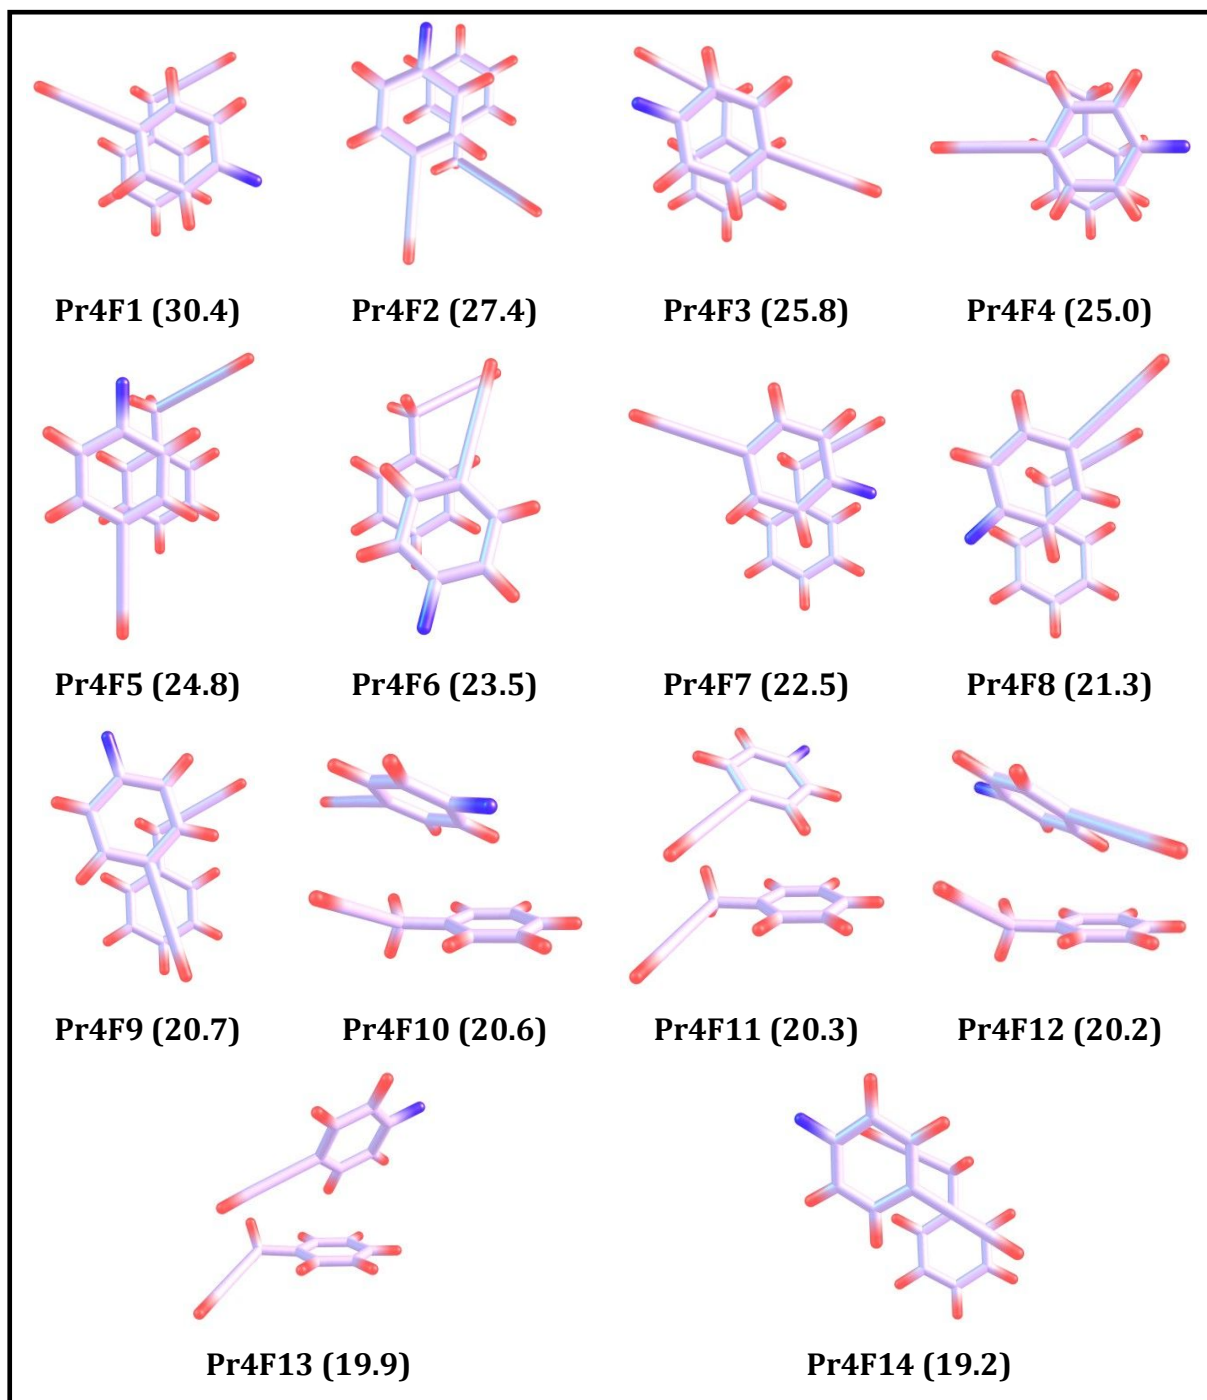

**Figure S5.** Structures of PrBz-4FPHA dimer optimized at M06-2X/aug-cc-pVDZ level. Structures are arranged in descending order with ZPE and BSSE corrected absolute value of stabilization energy ( $\text{kJ mol}^{-1}$ ) (see Table S4).

**Table S1. ZPE and BSSE corrected stabilization energies ( $\text{kJ mol}^{-1}$ ), dipole moments (D) and SAPT0 interaction energy components ( $\text{kJ mol}^{-1}$ ) for various structures of PrBz-PHA heterodimer.**

| Structure | M06-2X | MP2   | $\mu$ | $E_{Elec}$ | $E_{Disp}$ | $E_{Ind}$ | $E_{CT}$ | $E_{Exch}$ | $E_{SAPT0}$ |
|-----------|--------|-------|-------|------------|------------|-----------|----------|------------|-------------|
| PHA       | -      | -     | 0.71  |            |            |           |          |            |             |
| PrBz      | -      | -     | 0.53  |            |            |           |          |            |             |
| PrP1      | -24.7  | -33.6 | 0.5   | -27.9      | -65.6      | -6.6      | -0.5     | 64.0       | -36.1       |
| PrP2      | -23.8  | -32.1 | 1.1   | -23.7      | -65.7      | -6.7      | -0.6     | 62.2       | -33.9       |
| PrP3      | -23.6  | -32.9 | 0.3   | -25.4      | -64.9      | -6.3      | -0.4     | 61.9       | -34.8       |
| PrP4      | -23.3  | -28.9 | 0.7   | -19.7      | -60.7      | -6.4      | -0.7     | 55.9       | -30.9       |
| PrP5      | -23.2  | -32.6 | 0.9   | -23.8      | -66.9      | -6.2      | -0.5     | 63.0       | -34.0       |
| PrP6      | -23.0  | -31.6 | 0.9   | -20.2      | -62.2      | -6.8      | -0.6     | 59.0       | -33.8       |
| PrP7      | -22.4  | -31.0 | 0.7   | -21.2      | -64.6      | -6.3      | -0.6     | 60.2       | -31.9       |
| PrP8      | -21.7  | -28.2 | 1.0   | -24.6      | -56.4      | -6.3      | -0.7     | 56.0       | -31.3       |
| PrP9      | -21.4  | -27.1 | 1.0   | -25.2      | -53.2      | -6.7      | -0.8     | 53.9       | -31.3       |
| PrP10     | -21.2  | -29.5 | 1.1   | -22.3      | -63.6      | -5.9      | -0.4     | 61.2       | -30.7       |
| PrP11     | -19.2  | -25.8 | 0.3   | -15.9      | -56.8      | -5.0      | -0.5     | 52.0       | -25.7       |
| PrP12     | -18.2  | -25.3 | 1.3   | -21.4      | -54.6      | -5.6      | -0.5     | 53.4       | -28.3       |
| PrP13     | -15.5  | -20.0 | 0.6   | -19.1      | -41.3      | -5.6      | -0.8     | 41.2       | -24.8       |

**Table S2. ZPE and BSSE corrected stabilization energies (kJ mol<sup>-1</sup>), dipole moments (D) and SAPT0 interaction energy components (kJ mol<sup>-1</sup>) for various structures of PrBz-2FPHA heterodimer.**

| Structure     | M06-2X | MP2   | $\mu$ | $E_{Elec}$ | $E_{Disp}$ | $E_{Ind}$ | $E_{CT}$ | $E_{Exch}$ | $E_{SAPT0}$ |
|---------------|--------|-------|-------|------------|------------|-----------|----------|------------|-------------|
| <b>PrBz</b>   | -      | -     | 0.53  |            |            |           |          |            |             |
| <b>2FPHA</b>  | -      | -     | 1.77  |            |            |           |          |            |             |
| <b>Pr2F1</b>  | -26.1  | -35.0 | 1.3   | -27.9      | -70.3      | -6.4      | -0.7     | 68.0       | -36.7       |
| <b>Pr2F2</b>  | -26.0  | -34.5 | 1.4   | -26.1      | -68.8      | -6.8      | -0.7     | 65.5       | -36.3       |
| <b>Pr2F3</b>  | -25.9  | -35.0 | 1.4   | -29.3      | -66.5      | -6.5      | -0.5     | 64.8       | -37.5       |
| <b>Pr2F4</b>  | -25.8  | -34.9 | 1.4   | -30.3      | -65.3      | -6.4      | -0.4     | 64.4       | -37.7       |
| <b>Pr2F5</b>  | -25.7  | -34.2 | 1.8   | -29.1      | -70.0      | -6.5      | -0.5     | 69.5       | -36.2       |
| <b>Pr2F6</b>  | -25.6  | -34.9 | 1.8   | -29.9      | -66.0      | -6.2      | -0.5     | 66.0       | -36.2       |
| <b>Pr2F7</b>  | -25.5  | -34.9 | 1.6   | -29.4      | -68.4      | -6.4      | -0.4     | 67.5       | -36.7       |
| <b>Pr2F8</b>  | -25.0  | -32.0 | 1.9   | -28.8      | -65.0      | -6.8      | -0.8     | 64.8       | -35.7       |
| <b>Pr2F9</b>  | -23.9  | -32.0 | 1.9   | -25.2      | -67.0      | -6.4      | -0.5     | 65.0       | -33.6       |
| <b>Pr2F10</b> | -23.7  | -32.2 | 1.7   | -25.2      | -62.6      | -6.8      | -0.7     | 59.4       | -35.2       |
| <b>Pr2F11</b> | -22.8  | -29.6 | 1.2   | -27.0      | -54.3      | -6.1      | -0.6     | 54.3       | -33.1       |
| <b>Pr2F12</b> | -22.4  | -29.8 | 1.9   | -26.7      | -59.3      | -6.6      | -0.7     | 59.9       | -32.7       |
| <b>Pr2F13</b> | -22.2  | -30.8 | 2.1   | -24.1      | -60.8      | -6.7      | -0.7     | 59.0       | -32.6       |
| <b>Pr2F14</b> | -21.8  | -27.2 | 2     | -26.1      | -52.4      | -6.8      | -0.8     | 53.2       | -32.0       |
| <b>Pr2F15</b> | -21.4  | -28.4 | 1.3   | -19.0      | -59.4      | -5.1      | -0.5     | 55.3       | -28.3       |
| <b>Pr2F16</b> | -21.3  | -29.5 | 1.7   | -19.1      | -62.0      | -6.4      | -0.7     | 57.3       | -30.2       |
| <b>Pr2F17</b> | -21.3  | -27.6 | 1.8   | -24.3      | -50.8      | -5.4      | -0.6     | 49.7       | -30.8       |
| <b>Pr2F18</b> | -20.9  | -25.0 | 2.1   | -27.8      | -48.4      | -6.8      | -0.9     | 52.0       | -31.1       |
| <b>Pr2F19</b> | -19.9  | -26.7 | 1.5   | -17.4      | -61.3      | -5.3      | -0.4     | 57.8       | -26.2       |

**Table S3. ZPE and BSSE corrected stabilization energies (kJ mol<sup>-1</sup>), dipole moments (D) and SAPT0 interaction energy components (kJ mol<sup>-1</sup>) for various structures of PrBz-3FPHA heterodimer.**

| <b>Structure</b> | <b>M06-2X</b> | <b>MP2</b> | <b><math>\mu</math></b> | <b><math>E_{Elec}</math></b> | <b><math>E_{Disp}</math></b> | <b><math>E_{Ind}</math></b> | <b><math>E_{CT}</math></b> | <b><math>E_{Exch}</math></b> | <b><math>E_{SAPT0}</math></b> |
|------------------|---------------|------------|-------------------------|------------------------------|------------------------------|-----------------------------|----------------------------|------------------------------|-------------------------------|
| <b>PrBz</b>      | -             | -          | 0.53                    |                              |                              |                             |                            |                              |                               |
| <b>3FPHA</b>     | -             | -          | 1.40                    |                              |                              |                             |                            |                              |                               |
| <b>Pr3F1</b>     | -28.1         | -36.8      | 1.7                     | -29.9                        | -71.0                        | -7.0                        | -0.7                       | 69.1                         | -38.9                         |
| <b>Pr3F2</b>     | -26.4         | -36.0      | 1.4                     | -30.1                        | -69.6                        | -6.5                        | -0.5                       | 68.5                         | -37.7                         |
| <b>Pr3F3</b>     | -26.1         | -35.1      | 1.4                     | -29.5                        | -66.0                        | -6.5                        | -0.5                       | 64.3                         | -37.7                         |
| <b>Pr3F4</b>     | -26.1         | -34.7      | 1.3                     | -28.3                        | -68.6                        | -6.8                        | -0.6                       | 66.8                         | -36.9                         |
| <b>Pr3F5</b>     | -25.8         | -35.7      | 1.1                     | -28.1                        | -70.6                        | -6.4                        | -0.6                       | 68.1                         | -37.0                         |
| <b>Pr3F6</b>     | -24.8         | -33.9      | 1.6                     | -25.6                        | -66.9                        | -6.4                        | -0.6                       | 63.9                         | -35.1                         |
| <b>Pr3F7</b>     | -24.7         | -34.2      | 1.5                     | -25.1                        | -67.9                        | -6.0                        | -0.5                       | 63.8                         | -35.4                         |
| <b>Pr3F8</b>     | -24.6         | -34.0      | 1.0                     | -25.4                        | -66.0                        | -6.6                        | -0.6                       | 62.6                         | -35.5                         |
| <b>Pr3F9</b>     | -24.3         | -32.7      | 1.0                     | -28.5                        | -64.5                        | -5.9                        | -0.5                       | 64.5                         | -34.5                         |
| <b>Pr3F10</b>    | -23.7         | -33.2      | 1.4                     | -25.1                        | -65.6                        | -6.4                        | -0.5                       | 62.2                         | -34.9                         |
| <b>Pr3F11</b>    | -23.5         | -30.9      | 1.6                     | -24.9                        | -62.1                        | -6.0                        | -0.8                       | 59.7                         | -33.4                         |
| <b>Pr3F12</b>    | -23.0         | -31.0      | 1.7                     | -25.9                        | -61.8                        | -5.7                        | -0.4                       | 60.9                         | -32.4                         |
| <b>Pr3F13</b>    | -22.8         | -29.9      | 1.1                     | -20.2                        | -60.3                        | -6.2                        | -0.7                       | 55.5                         | -31.2                         |
| <b>Pr3F14</b>    | -22.2         | -29.7      | 0.8                     | -25.8                        | -62.1                        | -6.5                        | -0.6                       | 61.3                         | -33.0                         |
| <b>Pr3F15</b>    | -22.2         | -29.1      | 1.6                     | -25.1                        | -56.2                        | -6.2                        | -0.6                       | 55.7                         | -31.8                         |
| <b>Pr3F16</b>    | -22.2         | -28.5      | 1.6                     | -22.3                        | -63.3                        | -6.5                        | -0.7                       | 61.3                         | -30.9                         |
| <b>Pr3F17</b>    | -22.2         | -28.5      | 1.3                     | -25.1                        | -56.2                        | -6.2                        | -0.6                       | 55.7                         | -31.8                         |
| <b>Pr3F18</b>    | -21.7         | -27.2      | 1.5                     | -25.4                        | -52.1                        | -6.5                        | -0.8                       | 52.6                         | -31.4                         |
| <b>Pr3F19</b>    | -21.6         | -26.3      | 0.9                     | -28.5                        | -50.9                        | -6.8                        | -0.8                       | 54.7                         | -31.5                         |
| <b>Pr3F20</b>    | -21.1         | -30.3      | 1.8                     | -21.6                        | -62.1                        | -5.9                        | -0.6                       | 58.5                         | -31.1                         |
| <b>Pr3F21</b>    | -20.8         | -27.6      | 1.7                     | -18.1                        | -56.8                        | -4.8                        | -0.4                       | 52.4                         | -27.3                         |
| <b>Pr3F22</b>    | -20.5         | -24.8      | 1.8                     | -27.0                        | -48.0                        | -6.5                        | -0.8                       | 51.0                         | -30.5                         |
| <b>Pr3F23</b>    | -20.4         | -27.2      | 1.4                     | -17.8                        | -57.0                        | -4.9                        | -0.4                       | 52.9                         | -26.7                         |



**Table S4. ZPE and BSSE corrected stabilization energies (kJ mol<sup>-1</sup>), dipole moments (D) and SAPT0 interaction energy components (kJ mol<sup>-1</sup>) for various structures of PrBz-4FPHA heterodimer.**

| <b>Structure</b> | <b>M06-2X</b> | <b>MP2</b> | <b><math>\mu</math></b> | <b><math>E_{Elec}</math></b> | <b><math>E_{Disp}</math></b> | <b><math>E_{Ind}</math></b> | <b><math>E_{CT}</math></b> | <b><math>E_{Exch}</math></b> | <b><math>E_{SAPT0}</math></b> |
|------------------|---------------|------------|-------------------------|------------------------------|------------------------------|-----------------------------|----------------------------|------------------------------|-------------------------------|
| <b>PrBz</b>      | -             | -          | 0.53                    |                              |                              |                             |                            |                              |                               |
| <b>4FPHA</b>     | -             | -          | 0.85                    |                              |                              |                             |                            |                              |                               |
| <b>Pr4F1</b>     | -30.4         | -37.4      | 1.2                     | -29.3                        | -69.4                        | -6.9                        | -0.7                       | 65.8                         | -39.8                         |
| <b>Pr4F2</b>     | -27.4         | -34.8      | 0.8                     | -28.7                        | -65.7                        | -6.96                       | -0.7                       | 64.3                         | -37.1                         |
| <b>Pr4F3</b>     | -25.8         | -34.7      | 1.1                     | -28.2                        | -65.6                        | -6.89                       | -0.7                       | 63.8                         | -36.9                         |
| <b>Pr4F4</b>     | -25.0         | -34.7      | 0.7                     | -26.7                        | -68.0                        | -6.34                       | -0.5                       | 64.7                         | -36.4                         |
| <b>Pr4F5</b>     | -24.8         | -33.4      | 1.1                     | -25.5                        | -64.3                        | -6.09                       | -0.6                       | 61.2                         | -34.7                         |
| <b>Pr4F6</b>     | -23.5         | -31.2      | 0.7                     | -26.2                        | -61.9                        | -5.65                       | -0.5                       | 61.1                         | -32.6                         |
| <b>Pr4F7</b>     | -22.5         | -29.6      | 1.0                     | -26.2                        | -58.4                        | -6.43                       | -0.7                       | 58.7                         | -32.4                         |
| <b>Pr4F8</b>     | -21.3         | -29.3      | 0.4                     | -26.0                        | -55.1                        | -5.9                        | -0.6                       | 54.6                         | -32.3                         |
| <b>Pr4F9</b>     | -20.7         | -29.3      | 1.1                     | -26.5                        | -52.6                        | -6.87                       | -0.8                       | 53.4                         | -32.6                         |
| <b>Pr4F10</b>    | -20.6         | -28        | 1.0                     | -18.9                        | -59.7                        | -5.92                       | -0.7                       | 54.6                         | -29.9                         |
| <b>Pr4F11</b>    | -20.3         | -27.6      | 0.7                     | -23.8                        | -59.3                        | -6.26                       | -0.6                       | 57.1                         | -32.3                         |
| <b>Pr4F12</b>    | -20.2         | -28.8      | 1.1                     | -28.2                        | -48.5                        | -6.95                       | -0.9                       | 52.1                         | -31.6                         |
| <b>Pr4F13</b>    | -19.9         | -25.3      | 0.9                     | -18.9                        | -57.8                        | -5.04                       | -0.5                       | 53.8                         | -27.9                         |
| <b>Pr4F14</b>    | -19.2         | -27.6      | 1.4                     | -22.5                        | -55.1                        | -5.59                       | -0.5                       | 53.2                         | -30.1                         |

**Optimized coordinates (in angstrom) of various hetero-dimers of PrBz with PHA, 2FPHA, 3FPHA and 4FPHA calculated at M06-2X/aug-cc-pVDZ level of theory.**

\*\*\*\*\*

**PrBz-PHA Hetero-Dimer**

**PrP1**

|   |                |                |                |
|---|----------------|----------------|----------------|
| C | 1.78354000000  | 0.44109200000  | 0.50445200000  |
| C | 0.88282900000  | 1.48450700000  | 0.70191100000  |
| C | -0.23270900000 | 1.30364300000  | 1.52114100000  |
| C | -0.44489500000 | 0.07355600000  | 2.14492500000  |
| C | 0.45280400000  | -0.97261100000 | 1.95609200000  |
| C | 1.57202000000  | -0.79551400000 | 1.13085600000  |
| C | 2.48072100000  | -1.88559100000 | 0.90537400000  |
| C | 3.23693400000  | -2.80969100000 | 0.70394000000  |
| H | 2.65316100000  | 0.57105700000  | -0.13695800000 |
| H | 1.05368700000  | 2.44338000000  | 0.21434000000  |
| H | -0.94640300000 | 2.11370900000  | 1.66605100000  |
| H | -1.32810600000 | -0.07481000000 | 2.76385000000  |
| H | 0.28458100000  | -1.94041300000 | 2.42385700000  |
| H | 3.91341000000  | -3.62111800000 | 0.53788500000  |
| C | -0.22084500000 | -2.39240500000 | -1.20481900000 |
| C | -0.87207400000 | -1.16277300000 | -1.27852200000 |
| C | -2.03621300000 | -0.92913200000 | -0.54336300000 |
| C | -2.54966400000 | -1.94930400000 | 0.25963600000  |
| C | -1.90147300000 | -3.18199000000 | 0.33192000000  |
| C | -0.73243100000 | -3.40580300000 | -0.39518900000 |
| C | -2.71728700000 | 0.42425200000  | -0.65265700000 |
| C | -3.49195500000 | 0.80774000000  | 0.53053700000  |
| C | -4.13427900000 | 1.11829200000  | 1.50709400000  |
| H | 0.70268800000  | -2.55164700000 | -1.75937000000 |
| H | -0.45526600000 | -0.36537800000 | -1.89447000000 |
| H | -3.44913800000 | -1.76882300000 | 0.84701700000  |
| H | -2.30752800000 | -3.96857800000 | 0.96668300000  |
| H | -0.21484400000 | -4.36101500000 | -0.32315700000 |
| H | -3.38692900000 | 0.43057700000  | -1.52455000000 |
| H | -1.95313700000 | 1.19092400000  | -0.83377600000 |
| H | -4.70907200000 | 1.40083600000  | 2.36367600000  |

-----

**PrP2**

|   |                 |                 |                 |
|---|-----------------|-----------------|-----------------|
| C | -5.256508000000 | 2.563947000000  | -0.644733000000 |
| C | -5.947926000000 | 1.647358000000  | -1.431541000000 |
| C | -5.902917000000 | 0.286555000000  | -1.125447000000 |
| C | -5.161620000000 | -0.155887000000 | -0.029548000000 |
| C | -4.463163000000 | 0.753208000000  | 0.758548000000  |
| C | -4.506715000000 | 2.120850000000  | 0.455282000000  |
| C | -3.761501000000 | 3.061162000000  | 1.244894000000  |
| C | -3.096281000000 | 3.854652000000  | 1.872387000000  |
| H | -5.291379000000 | 3.628265000000  | -0.871801000000 |
| H | -6.528176000000 | 1.996660000000  | -2.284172000000 |
| H | -6.444840000000 | -0.428592000000 | -1.742411000000 |
| H | -5.116322000000 | -1.217961000000 | 0.206159000000  |
| H | -3.865698000000 | 0.414388000000  | 1.602244000000  |
| H | -2.501458000000 | 4.553029000000  | 2.421865000000  |
| C | -2.302832000000 | -0.286363000000 | -1.859213000000 |
| C | -2.259127000000 | 1.095359000000  | -2.019231000000 |
| C | -1.583738000000 | 1.900348000000  | -1.095368000000 |
| C | -0.960514000000 | 1.300319000000  | -0.001952000000 |
| C | -1.006181000000 | -0.085813000000 | 0.161954000000  |
| C | -1.672634000000 | -0.883202000000 | -0.765713000000 |
| C | -1.591264000000 | 3.404104000000  | -1.307524000000 |
| C | -0.647053000000 | 4.151543000000  | -0.475995000000 |
| C | 0.144178000000  | 4.760994000000  | 0.205656000000  |
| H | -2.834466000000 | -0.898641000000 | -2.586295000000 |
| H | -2.760238000000 | 1.558159000000  | -2.870221000000 |
| H | -0.438727000000 | 1.921720000000  | 0.723827000000  |
| H | -0.511757000000 | -0.542943000000 | 1.018137000000  |
| H | -1.702896000000 | -1.964429000000 | -0.638488000000 |
| H | -2.604307000000 | 3.783901000000  | -1.110153000000 |
| H | -1.372276000000 | 3.617629000000  | -2.361831000000 |
| H | 0.845849000000  | 5.309308000000  | 0.797740000000  |

**PrP3**

|   |                 |                 |                 |
|---|-----------------|-----------------|-----------------|
| C | 0.360882000000  | 1.385472000000  | 1.106992000000  |
| C | -0.620687000000 | 1.169150000000  | 2.070734000000  |
| C | -0.783888000000 | -0.096833000000 | 2.632963000000  |
| C | 0.046325000000  | -1.146739000000 | 2.237452000000  |
| C | 1.028705000000  | -0.939685000000 | 1.275112000000  |
| C | 1.186082000000  | 0.328066000000  | 0.697199000000  |
| C | 2.162559000000  | 0.532332000000  | -0.336620000000 |
| C | 2.964465000000  | 0.697233000000  | -1.228960000000 |
| H | 0.492389000000  | 2.367849000000  | 0.656550000000  |
| H | -1.272459000000 | 1.986220000000  | 2.375379000000  |
| H | -1.568138000000 | -0.266528000000 | 3.368168000000  |
| H | -0.084175000000 | -2.137912000000 | 2.668470000000  |
| H | 1.664236000000  | -1.758061000000 | 0.944114000000  |
| H | 3.688062000000  | 0.848240000000  | -2.001626000000 |
| C | -0.145065000000 | -1.828163000000 | -1.849665000000 |
| C | -0.952819000000 | -0.736686000000 | -1.540552000000 |
| C | -2.027378000000 | -0.870717000000 | -0.656482000000 |
| C | -2.283786000000 | -2.118006000000 | -0.085706000000 |
| C | -1.477746000000 | -3.214081000000 | -0.395261000000 |
| C | -0.406581000000 | -3.073132000000 | -1.276269000000 |
| C | -2.893747000000 | 0.345782000000  | -0.376692000000 |
| C | -3.749181000000 | 0.235586000000  | 0.806249000000  |
| C | -4.462533000000 | 0.139212000000  | 1.778036000000  |
| H | 0.699149000000  | -1.700163000000 | -2.525506000000 |
| H | -0.729942000000 | 0.238495000000  | -1.975663000000 |
| H | -3.110442000000 | -2.226786000000 | 0.614882000000  |
| H | -1.686769000000 | -4.182318000000 | 0.058013000000  |
| H | 0.224676000000  | -3.928377000000 | -1.512979000000 |

|   |                 |                |                 |
|---|-----------------|----------------|-----------------|
| H | -3.532903000000 | 0.541572000000 | -1.249255000000 |
| H | -2.244168000000 | 1.222335000000 | -0.258525000000 |
| H | -5.100977000000 | 0.063723000000 | 2.632722000000  |

-----  
**PrP4**

|   |                 |                 |                 |
|---|-----------------|-----------------|-----------------|
| C | -4.177280000000 | 3.838319000000  | 0.665950000000  |
| C | -4.284462000000 | 5.096133000000  | 0.077411000000  |
| C | -4.972419000000 | 5.252519000000  | -1.125758000000 |
| C | -5.553132000000 | 4.142165000000  | -1.744265000000 |
| C | -5.452147000000 | 2.882536000000  | -1.160738000000 |
| C | -4.764503000000 | 2.722983000000  | 0.052594000000  |
| C | -4.652351000000 | 1.423095000000  | 0.652609000000  |
| C | -4.552039000000 | 0.325510000000  | 1.152124000000  |
| H | -3.626095000000 | 3.705971000000  | 1.594754000000  |
| H | -3.812659000000 | 5.954037000000  | 0.552634000000  |
| H | -5.050997000000 | 6.235983000000  | -1.585892000000 |
| H | -6.087301000000 | 4.259686000000  | -2.685781000000 |
| H | -5.898418000000 | 2.010801000000  | -1.635543000000 |
| H | -4.452817000000 | -0.645372000000 | 1.588631000000  |
| C | -2.478437000000 | -0.404888000000 | -1.787241000000 |
| C | -2.458961000000 | 0.953101000000  | -2.086906000000 |
| C | -1.760849000000 | 1.854976000000  | -1.275062000000 |
| C | -1.090549000000 | 1.374106000000  | -0.152061000000 |
| C | -1.107866000000 | 0.010429000000  | 0.150156000000  |
| C | -1.796394000000 | -0.882544000000 | -0.665882000000 |
| C | -1.757038000000 | 3.321354000000  | -1.672748000000 |
| C | -1.077984000000 | 4.214798000000  | -0.733888000000 |
| C | -0.504727000000 | 4.941413000000  | 0.044529000000  |
| H | -3.026579000000 | -1.094107000000 | -2.428105000000 |
| H | -2.994647000000 | 1.325117000000  | -2.961444000000 |
| H | -0.551386000000 | 2.069185000000  | 0.489229000000  |
| H | -0.577737000000 | -0.352078000000 | 1.029910000000  |
| H | -1.807841000000 | -1.945810000000 | -0.430177000000 |
| H | -2.794021000000 | 3.662574000000  | -1.796652000000 |
| H | -1.275650000000 | 3.420613000000  | -2.655487000000 |
| H | 0.002483000000  | 5.594945000000  | 0.722224000000  |

-----  
**PrP5**

|   |                 |                 |                 |
|---|-----------------|-----------------|-----------------|
| C | -0.515228000000 | 0.592581000000  | 2.279492000000  |
| C | 0.413872000000  | 1.253153000000  | 1.479131000000  |
| C | 1.412089000000  | 0.533942000000  | 0.820786000000  |
| C | 1.484692000000  | -0.852214000000 | 0.969461000000  |
| C | 0.562452000000  | -1.519259000000 | 1.767886000000  |
| C | -0.447000000000 | -0.800023000000 | 2.425022000000  |
| C | -1.415418000000 | -1.492932000000 | 3.228775000000  |
| C | -2.233878000000 | -2.084306000000 | 3.896974000000  |
| H | -1.306630000000 | 1.141633000000  | 2.784934000000  |
| H | 0.358285000000  | 2.335425000000  | 1.370025000000  |
| H | 2.134714000000  | 1.053667000000  | 0.193439000000  |
| H | 2.256666000000  | -1.418069000000 | 0.450686000000  |
| H | 0.600920000000  | -2.601145000000 | 1.875845000000  |
| H | -2.950625000000 | -2.604169000000 | 4.496402000000  |
| C | -0.217466000000 | -2.262306000000 | -1.803982000000 |
| C | -0.851776000000 | -1.044150000000 | -1.573220000000 |
| C | -1.918424000000 | -0.954194000000 | -0.673913000000 |
| C | -2.342933000000 | -2.104468000000 | -0.008118000000 |
| C | -1.706365000000 | -3.325038000000 | -0.234326000000 |
| C | -0.642913000000 | -3.408952000000 | -1.131691000000 |
| C | -2.586280000000 | 0.396338000000  | -0.472987000000 |
| C | -3.466542000000 | 0.471616000000  | 0.693879000000  |
| C | -4.185591000000 | 0.510182000000  | 1.664950000000  |
| H | 0.614631000000  | -2.316284000000 | -2.504790000000 |

|   |                 |                 |                 |
|---|-----------------|-----------------|-----------------|
| H | -0.507288000000 | -0.147080000000 | -2.089238000000 |
| H | -3.157144000000 | -2.038819000000 | 0.711554000000  |
| H | -2.040863000000 | -4.212812000000 | 0.300717000000  |
| H | -0.146502000000 | -4.362367000000 | -1.306905000000 |
| H | -3.167619000000 | 0.649857000000  | -1.370555000000 |
| H | -1.806700000000 | 1.163046000000  | -0.373552000000 |
| H | -4.818474000000 | 0.549711000000  | 2.526018000000  |

-----  
**PrP6**

|   |                 |                 |                 |
|---|-----------------|-----------------|-----------------|
| C | 1.397770000000  | 1.057101000000  | 0.874125000000  |
| C | 2.051794000000  | -0.170303000000 | 0.839556000000  |
| C | 1.481572000000  | -1.286956000000 | 1.453609000000  |
| C | 0.255126000000  | -1.172706000000 | 2.106581000000  |
| C | -0.403937000000 | 0.052771000000  | 2.150497000000  |
| C | 0.163564000000  | 1.175918000000  | 1.531712000000  |
| C | -0.525539000000 | 2.437233000000  | 1.558091000000  |
| C | -1.125055000000 | 3.489309000000  | 1.562137000000  |
| H | 1.833151000000  | 1.933102000000  | 0.397006000000  |
| H | 3.008958000000  | -0.257392000000 | 0.327584000000  |
| H | 1.988778000000  | -2.249598000000 | 1.413130000000  |
| H | -0.199733000000 | -2.045849000000 | 2.570969000000  |
| H | -1.370876000000 | 0.148706000000  | 2.640777000000  |
| H | -1.652108000000 | 4.419617000000  | 1.580885000000  |
| C | -0.123014000000 | -2.141386000000 | -1.457740000000 |
| C | -0.806589000000 | -0.940566000000 | -1.282349000000 |
| C | -1.992504000000 | -0.897921000000 | -0.544872000000 |
| C | -2.485467000000 | -2.076991000000 | 0.016524000000  |
| C | -1.802400000000 | -3.280847000000 | -0.158261000000 |
| C | -0.619761000000 | -3.317699000000 | -0.895770000000 |
| C | -2.719136000000 | 0.427866000000  | -0.398986000000 |
| C | -3.585877000000 | 0.519250000000  | 0.777877000000  |
| C | -4.303605000000 | 0.586428000000  | 1.748848000000  |
| H | 0.807096000000  | -2.156176000000 | -2.024374000000 |
| H | -0.403368000000 | -0.019980000000 | -1.705246000000 |
| H | -3.401033000000 | -2.047707000000 | 0.605788000000  |
| H | -2.196311000000 | -4.194229000000 | 0.285835000000  |
| H | -0.085082000000 | -4.257165000000 | -1.028068000000 |
| H | -3.330289000000 | 0.606060000000  | -1.295365000000 |
| H | -1.984070000000 | 1.241226000000  | -0.351743000000 |
| H | -4.939779000000 | 0.660914000000  | 2.605133000000  |

-----  
**PrP7**

|   |                 |                 |                 |
|---|-----------------|-----------------|-----------------|
| C | 2.597807000000  | -1.944190000000 | 0.804544000000  |
| C | 2.768524000000  | -2.136025000000 | 2.171929000000  |
| C | 1.838647000000  | -1.619389000000 | 3.075299000000  |
| C | 0.735330000000  | -0.905207000000 | 2.609104000000  |
| C | 0.553117000000  | -0.716981000000 | 1.242296000000  |
| C | 1.482329000000  | -1.238400000000 | 0.330295000000  |
| C | 1.297931000000  | -1.042158000000 | -1.081335000000 |
| C | 1.146580000000  | -0.858334000000 | -2.268593000000 |
| H | 3.323158000000  | -2.329869000000 | 0.091486000000  |
| H | 3.635227000000  | -2.686235000000 | 2.534998000000  |
| H | 0.019620000000  | -0.483607000000 | 3.312679000000  |
| H | -0.304678000000 | -0.160317000000 | 0.868848000000  |
| H | 1.014757000000  | -0.709551000000 | -3.319242000000 |
| C | 1.285299000000  | 2.683751000000  | 3.251258000000  |
| C | 1.564160000000  | 2.579887000000  | 1.892457000000  |
| C | 2.701032000000  | 1.895535000000  | 1.444481000000  |
| C | 3.553926000000  | 1.317845000000  | 2.381980000000  |
| C | 3.277993000000  | 1.424310000000  | 3.747426000000  |
| C | 2.146165000000  | 2.104488000000  | 4.187199000000  |
| C | 2.955239000000  | 1.827795000000  | -0.051683000000 |

|   |                |                 |                 |
|---|----------------|-----------------|-----------------|
| C | 4.091873000000 | 0.997628000000  | -0.451002000000 |
| C | 5.039416000000 | 0.319934000000  | -0.774587000000 |
| H | 0.396944000000 | 3.219449000000  | 3.583500000000  |
| H | 0.889300000000 | 3.031751000000  | 1.164136000000  |
| H | 4.433719000000 | 0.773998000000  | 2.042307000000  |
| H | 3.953085000000 | 0.966261000000  | 4.469342000000  |
| H | 1.932464000000 | 2.186487000000  | 5.251895000000  |
| H | 3.118907000000 | 2.846276000000  | -0.430649000000 |
| H | 2.055851000000 | 1.447699000000  | -0.554605000000 |
| H | 5.872833000000 | -0.277777000000 | -1.076788000000 |
| H | 1.981996000000 | -1.760218000000 | 4.145433000000  |

-----  
**PrP8**

|   |                 |                 |                 |
|---|-----------------|-----------------|-----------------|
| C | -4.818837000000 | 5.127932000000  | -0.551248000000 |
| C | -5.370104000000 | 4.186843000000  | -1.417983000000 |
| C | -5.212176000000 | 2.822697000000  | -1.166795000000 |
| C | -4.495392000000 | 2.399270000000  | -0.046700000000 |
| C | -3.939977000000 | 3.333680000000  | 0.821974000000  |
| C | -4.102119000000 | 4.705918000000  | 0.578031000000  |
| C | -3.542667000000 | 5.673178000000  | 1.481122000000  |
| C | -3.088335000000 | 6.491268000000  | 2.249102000000  |
| H | -4.937023000000 | 6.193239000000  | -0.738897000000 |
| H | -5.925844000000 | 4.520787000000  | -2.292809000000 |
| H | -5.638278000000 | 2.088222000000  | -1.848559000000 |
| H | -4.343981000000 | 1.335776000000  | 0.135037000000  |
| H | -3.364101000000 | 3.012400000000  | 1.687629000000  |
| H | -2.687781000000 | 7.215743000000  | 2.926082000000  |
| C | -2.513725000000 | -0.324835000000 | -2.141731000000 |
| C | -2.314762000000 | 1.036373000000  | -2.352826000000 |
| C | -1.672319000000 | 1.823305000000  | -1.390829000000 |
| C | -1.214420000000 | 1.220253000000  | -0.220731000000 |
| C | -1.412272000000 | -0.145863000000 | -0.005786000000 |
| C | -2.065681000000 | -0.921526000000 | -0.960677000000 |
| C | -1.547279000000 | 3.313953000000  | -1.651021000000 |
| C | -0.908822000000 | 4.076205000000  | -0.578224000000 |
| C | -0.396676000000 | 4.701392000000  | 0.320662000000  |
| H | -3.020022000000 | -0.923472000000 | -2.897881000000 |
| H | -2.678816000000 | 1.502852000000  | -3.269268000000 |
| H | -0.714066000000 | 1.826584000000  | 0.532697000000  |
| H | -1.053093000000 | -0.604124000000 | 0.914750000000  |
| H | -2.222052000000 | -1.985698000000 | -0.790883000000 |
| H | -2.556223000000 | 3.722456000000  | -1.811943000000 |
| H | -0.989537000000 | 3.473521000000  | -2.583687000000 |
| H | 0.039109000000  | 5.274704000000  | 1.111030000000  |

-----  
**PrP9**

|   |                 |                 |                 |
|---|-----------------|-----------------|-----------------|
| C | 0.940270000000  | -1.097367000000 | 1.803102000000  |
| C | 2.254687000000  | -1.201572000000 | 1.356929000000  |
| C | 3.169325000000  | -0.180612000000 | 1.615160000000  |
| C | 2.765583000000  | 0.953379000000  | 2.322408000000  |
| C | 1.453725000000  | 1.066004000000  | 2.772301000000  |
| C | 0.532124000000  | 0.038666000000  | 2.516516000000  |
| C | -0.826898000000 | 0.159916000000  | 2.968551000000  |
| C | -1.978613000000 | 0.280147000000  | 3.322377000000  |
| H | 0.218506000000  | -1.883811000000 | 1.588568000000  |
| H | 2.561868000000  | -2.084604000000 | 0.798415000000  |
| H | 4.197003000000  | -0.266108000000 | 1.264964000000  |
| H | 3.476685000000  | 1.752773000000  | 2.525184000000  |
| H | 1.129820000000  | 1.945554000000  | 3.325666000000  |
| H | -3.000591000000 | 0.387928000000  | 3.618121000000  |
| C | -0.028757000000 | -2.083779000000 | -1.416069000000 |
| C | -0.489564000000 | -0.786916000000 | -1.201688000000 |

|   |                 |                 |                 |
|---|-----------------|-----------------|-----------------|
| C | -1.605349000000 | -0.549534000000 | -0.393129000000 |
| C | -2.257620000000 | -1.633779000000 | 0.195553000000  |
| C | -1.796560000000 | -2.934187000000 | -0.015211000000 |
| C | -0.680703000000 | -3.164136000000 | -0.819733000000 |
| C | -2.035760000000 | 0.886169000000  | -0.147628000000 |
| C | -3.401422000000 | 1.037726000000  | 0.356865000000  |
| C | -4.535113000000 | 1.154452000000  | 0.761028000000  |
| H | 0.842268000000  | -2.251419000000 | -2.048069000000 |
| H | 0.029921000000  | 0.054771000000  | -1.660766000000 |
| H | -3.127948000000 | -1.456074000000 | 0.824797000000  |
| H | -2.314333000000 | -3.771437000000 | 0.450365000000  |
| H | -0.324831000000 | -4.179665000000 | -0.986450000000 |
| H | -1.943727000000 | 1.454348000000  | -1.082054000000 |
| H | -1.344657000000 | 1.343642000000  | 0.575447000000  |
| H | -5.539854000000 | 1.272427000000  | 1.107680000000  |

-----  
**PrP10**

|   |                 |                 |                 |
|---|-----------------|-----------------|-----------------|
| C | -2.582305000000 | 1.416225000000  | 4.193278000000  |
| C | -1.865327000000 | 2.432423000000  | 3.569632000000  |
| C | -0.483240000000 | 2.318471000000  | 3.376882000000  |
| C | 0.169549000000  | 1.170492000000  | 3.820101000000  |
| C | -0.547916000000 | 0.151705000000  | 4.451235000000  |
| C | -1.922145000000 | 0.268422000000  | 4.638988000000  |
| C | 0.243522000000  | 3.462296000000  | 2.689005000000  |
| C | 1.660640000000  | 3.216992000000  | 2.419762000000  |
| C | 2.825899000000  | 2.987916000000  | 2.194409000000  |
| H | -3.657399000000 | 1.518740000000  | 4.335214000000  |
| H | -2.383866000000 | 3.327134000000  | 3.221860000000  |
| H | 1.241468000000  | 1.066417000000  | 3.659300000000  |
| H | -0.025598000000 | -0.742574000000 | 4.788929000000  |
| H | -2.480012000000 | -0.528042000000 | 5.129257000000  |
| H | 0.149703000000  | 4.368481000000  | 3.303173000000  |
| H | -0.260334000000 | 3.677850000000  | 1.736483000000  |
| H | 3.852479000000  | 2.779430000000  | 1.979868000000  |
| C | 0.490142000000  | -1.010055000000 | 1.111526000000  |
| C | -0.894272000000 | -0.952339000000 | 1.247807000000  |
| C | -1.596350000000 | 0.166592000000  | 0.803025000000  |
| C | -0.909327000000 | 1.228168000000  | 0.211421000000  |
| C | 0.474447000000  | 1.181701000000  | 0.076023000000  |
| C | 1.184361000000  | 0.059982000000  | 0.530825000000  |
| C | 2.614285000000  | 0.005182000000  | 0.400432000000  |
| C | 3.818556000000  | -0.053582000000 | 0.287343000000  |
| H | 1.047087000000  | -1.877523000000 | 1.460698000000  |
| H | -1.426111000000 | -1.779100000000 | 1.715481000000  |
| H | -2.677078000000 | 0.215578000000  | 0.924145000000  |
| H | -1.457557000000 | 2.100970000000  | -0.141346000000 |
| H | 1.021941000000  | 2.010295000000  | -0.368778000000 |
| H | 4.880891000000  | -0.111384000000 | 0.178745000000  |

-----  
**PrP11**

|   |                 |                 |                |
|---|-----------------|-----------------|----------------|
| C | -3.081205000000 | 0.909879000000  | 3.379923000000 |
| C | -4.446058000000 | 0.694551000000  | 3.542255000000 |
| C | -5.099248000000 | -0.270912000000 | 2.775970000000 |
| C | -4.383474000000 | -1.020820000000 | 1.841741000000 |
| C | -3.018732000000 | -0.810032000000 | 1.672620000000 |
| C | -2.357454000000 | 0.157717000000  | 2.443130000000 |
| C | -0.948061000000 | 0.375274000000  | 2.269627000000 |
| C | 0.235531000000  | 0.565299000000  | 2.100523000000 |
| H | -2.562909000000 | 1.658839000000  | 3.976097000000 |
| H | -5.002604000000 | 1.283493000000  | 4.269463000000 |
| H | -6.167387000000 | -0.438934000000 | 2.906670000000 |
| H | -4.891706000000 | -1.774737000000 | 1.242521000000 |

|   |                 |                 |                 |
|---|-----------------|-----------------|-----------------|
| H | -2.449521000000 | -1.385479000000 | 0.945092000000  |
| H | 1.280136000000  | 0.726855000000  | 1.939040000000  |
| C | 0.738027000000  | 1.571996000000  | -1.550752000000 |
| C | -0.113753000000 | 2.394253000000  | -0.819780000000 |
| C | -1.446206000000 | 2.028889000000  | -0.601523000000 |
| C | -1.918150000000 | 0.835110000000  | -1.143485000000 |
| C | -1.064123000000 | 0.005585000000  | -1.873651000000 |
| C | 0.265287000000  | 0.366999000000  | -2.075783000000 |
| C | -2.307751000000 | 2.929210000000  | 0.265943000000  |
| C | -3.725572000000 | 2.570716000000  | 0.308156000000  |
| C | -4.893858000000 | 2.261690000000  | 0.335459000000  |
| H | 1.773428000000  | 1.869392000000  | -1.712758000000 |
| H | 0.261749000000  | 3.328666000000  | -0.400422000000 |
| H | -2.957431000000 | 0.551344000000  | -0.984807000000 |
| H | -1.443212000000 | -0.927574000000 | -2.288807000000 |
| H | 0.930122000000  | -0.280391000000 | -2.645583000000 |
| H | -2.213221000000 | 3.966179000000  | -0.082195000000 |
| H | -1.908942000000 | 2.902376000000  | 1.291228000000  |
| H | -5.928308000000 | 1.994561000000  | 0.373345000000  |

-----  
**PrP12**

|   |                 |                 |                 |
|---|-----------------|-----------------|-----------------|
| C | -3.123094000000 | 1.762625000000  | 3.934110000000  |
| C | -2.142972000000 | 2.581805000000  | 3.375170000000  |
| C | -0.787889000000 | 2.328810000000  | 3.601943000000  |
| C | -0.425613000000 | 1.250130000000  | 4.410026000000  |
| C | -1.403267000000 | 0.431681000000  | 4.974552000000  |
| C | -2.754817000000 | 0.681283000000  | 4.735091000000  |
| C | 0.254256000000  | 3.230150000000  | 2.963691000000  |
| C | 1.533315000000  | 2.568684000000  | 2.695208000000  |
| C | 2.580649000000  | 2.013312000000  | 2.459519000000  |
| H | -4.175303000000 | 1.965740000000  | 3.739949000000  |
| H | -2.435289000000 | 3.418968000000  | 2.740088000000  |
| H | 0.629835000000  | 1.033464000000  | 4.569353000000  |
| H | -1.107859000000 | -0.411560000000 | 5.597535000000  |
| H | -3.517346000000 | 0.036106000000  | 5.168489000000  |
| H | 0.430826000000  | 4.102553000000  | 3.609169000000  |
| H | -0.141489000000 | 3.614811000000  | 2.014644000000  |
| H | 3.501416000000  | 1.523536000000  | 2.220527000000  |
| C | 1.365928000000  | -0.876407000000 | 0.845984000000  |
| C | 0.185240000000  | -0.923406000000 | 1.580845000000  |
| C | -0.825317000000 | 0.008294000000  | 1.346433000000  |
| C | -0.652757000000 | 0.987684000000  | 0.367125000000  |
| C | 0.525618000000  | 1.043329000000  | -0.371024000000 |
| C | 1.546346000000  | 0.112656000000  | -0.131339000000 |
| C | 2.782817000000  | 0.187668000000  | -0.859442000000 |
| C | 3.834797000000  | 0.258153000000  | -1.455202000000 |
| H | 2.162426000000  | -1.595767000000 | 1.027220000000  |
| H | 0.054991000000  | -1.684854000000 | 2.348288000000  |
| H | -1.738357000000 | -0.015383000000 | 1.940867000000  |
| H | -1.441440000000 | 1.716847000000  | 0.184286000000  |
| H | 0.673461000000  | 1.810216000000  | -1.128894000000 |
| H | 4.757755000000  | 0.316508000000  | -1.992335000000 |

-----  
**PrP13**

|   |                 |                 |                |
|---|-----------------|-----------------|----------------|
| C | -3.771525000000 | -0.445004000000 | 3.143736000000 |
| C | -3.843870000000 | 0.907742000000  | 3.462950000000 |
| C | -5.083105000000 | 1.522725000000  | 3.641733000000 |
| C | -6.256934000000 | 0.779649000000  | 3.499272000000 |
| C | -6.193298000000 | -0.573774000000 | 3.179040000000 |
| C | -4.947906000000 | -1.194426000000 | 2.999776000000 |
| C | -4.881205000000 | -2.589512000000 | 2.660899000000 |
| C | -4.828773000000 | -3.762051000000 | 2.363123000000 |



|   |                 |                 |                 |
|---|-----------------|-----------------|-----------------|
| H | -2.808379000000 | -0.927140000000 | 2.987069000000  |
| H | -2.927588000000 | 1.486557000000  | 3.563882000000  |
| H | -5.135626000000 | 2.581538000000  | 3.890458000000  |
| H | -7.225838000000 | 1.256183000000  | 3.640276000000  |
| H | -7.102066000000 | -1.161459000000 | 3.064879000000  |
| H | -4.786008000000 | -4.798874000000 | 2.103723000000  |
| C | 0.346017000000  | -2.078053000000 | -0.395839000000 |
| C | -0.464942000000 | -1.122448000000 | -1.006771000000 |
| C | -1.824444000000 | -1.038846000000 | -0.695198000000 |
| C | -2.362496000000 | -1.927375000000 | 0.238198000000  |
| C | -1.553255000000 | -2.882831000000 | 0.851834000000  |
| C | -0.196546000000 | -2.961566000000 | 0.537330000000  |
| C | -2.694837000000 | -0.010381000000 | -1.399921000000 |
| C | -3.845391000000 | 0.419857000000  | -0.601630000000 |
| C | -4.771922000000 | 0.737797000000  | 0.106409000000  |
| H | 1.405170000000  | -2.128489000000 | -0.645241000000 |
| H | -0.033547000000 | -0.429503000000 | -1.730059000000 |
| H | -3.419843000000 | -1.867048000000 | 0.492877000000  |
| H | -1.989570000000 | -3.561230000000 | 1.584281000000  |
| H | 0.437230000000  | -3.704429000000 | 1.019443000000  |
| H | -3.055630000000 | -0.427430000000 | -2.351223000000 |
| H | -2.086662000000 | 0.866946000000  | -1.653119000000 |
| H | -5.579516000000 | 1.016921000000  | 0.751969000000  |

---

**PrBz-2FPHA Hetero-Dimer**

**Pr2F1**

|   |                 |                 |                 |
|---|-----------------|-----------------|-----------------|
| C | 0.550374000000  | -1.242014000000 | 2.147782000000  |
| C | -0.348354000000 | -1.594579000000 | 3.149659000000  |
| C | -1.463270000000 | -0.795076000000 | 3.402146000000  |
| C | -1.683937000000 | 0.360668000000  | 2.655091000000  |
| C | -0.780520000000 | 0.686627000000  | 1.658479000000  |
| C | 0.350581000000  | -0.085834000000 | 1.379843000000  |
| C | 1.269802000000  | 0.303690000000  | 0.352473000000  |
| C | 2.065321000000  | 0.631504000000  | -0.498007000000 |
| H | 1.421236000000  | -1.859119000000 | 1.936563000000  |
| H | -0.180928000000 | -2.498686000000 | 3.731351000000  |
| H | -2.554017000000 | 0.992601000000  | 2.819847000000  |
| H | 2.765495000000  | 0.923894000000  | -1.251503000000 |
| C | -0.706147000000 | -1.451057000000 | -1.754064000000 |
| C | -1.760028000000 | -0.639271000000 | -1.347258000000 |
| C | -2.620785000000 | -1.048765000000 | -0.322285000000 |
| C | -2.409442000000 | -2.282895000000 | 0.289925000000  |
| C | -1.350402000000 | -3.097258000000 | -0.116994000000 |
| C | -0.496799000000 | -2.686113000000 | -1.137538000000 |
| C | -3.748092000000 | -0.112314000000 | 0.080073000000  |
| C | -4.550245000000 | -0.557461000000 | 1.220667000000  |
| C | -5.207741000000 | -0.928178000000 | 2.165432000000  |
| H | -0.035400000000 | -1.112602000000 | -2.541804000000 |
| H | -1.909443000000 | 0.333000000000  | -1.818131000000 |
| H | -3.067331000000 | -2.602525000000 | 1.096248000000  |
| H | -1.191013000000 | -4.056511000000 | 0.373974000000  |
| H | 0.331983000000  | -3.319626000000 | -1.449603000000 |
| H | -4.416336000000 | 0.033913000000  | -0.779597000000 |
| H | -3.322159000000 | 0.874545000000  | 0.309754000000  |
| H | -5.806271000000 | -1.250653000000 | 2.991067000000  |
| F | -1.011251000000 | 1.783578000000  | 0.912500000000  |
| H | -2.174455000000 | -1.073122000000 | 4.177696000000  |

---

**Pr2F2**

|   |                |                 |                |
|---|----------------|-----------------|----------------|
| C | 1.850667000000 | -1.689708000000 | 0.532465000000 |
|---|----------------|-----------------|----------------|

|   |                 |                 |                 |
|---|-----------------|-----------------|-----------------|
| C | 1.869947000000  | -1.942383000000 | 1.898916000000  |
| C | 1.034465000000  | -1.222677000000 | 2.756081000000  |
| C | 0.185207000000  | -0.241526000000 | 2.252316000000  |
| C | 0.185503000000  | -0.004045000000 | 0.887567000000  |
| C | 0.994087000000  | -0.714888000000 | -0.002676000000 |
| C | 0.945035000000  | -0.447216000000 | -1.409397000000 |
| C | 0.912159000000  | -0.224240000000 | -2.598047000000 |
| H | 2.539882000000  | -2.700787000000 | 2.298535000000  |
| H | -0.456690000000 | 0.355007000000  | 2.895918000000  |
| H | 0.883795000000  | -0.030417000000 | -3.649340000000 |
| C | 1.356987000000  | 2.935179000000  | 3.296162000000  |
| C | 1.599956000000  | 2.908186000000  | 1.926472000000  |
| C | 2.612467000000  | 2.098922000000  | 1.396182000000  |
| C | 3.374758000000  | 1.315499000000  | 2.260632000000  |
| C | 3.133834000000  | 1.343545000000  | 3.636227000000  |
| C | 2.127243000000  | 2.151038000000  | 4.158882000000  |
| C | 2.838543000000  | 2.123027000000  | -0.106074000000 |
| C | 3.831201000000  | 1.165779000000  | -0.594836000000 |
| C | 4.657767000000  | 0.375539000000  | -0.987165000000 |
| H | 0.565812000000  | 3.569605000000  | 3.693658000000  |
| H | 0.990825000000  | 3.514017000000  | 1.254825000000  |
| H | 4.155803000000  | 0.674837000000  | 1.854830000000  |
| H | 3.737404000000  | 0.726097000000  | 4.300423000000  |
| H | 1.941492000000  | 2.173383000000  | 5.231773000000  |
| H | 3.153381000000  | 3.133573000000  | -0.401270000000 |
| H | 1.885645000000  | 1.933222000000  | -0.619287000000 |
| H | 5.385407000000  | -0.317761000000 | -1.352325000000 |
| H | 1.055667000000  | -1.412278000000 | 3.827699000000  |
| F | -0.611435000000 | 0.962910000000  | 0.398092000000  |
| H | 2.499322000000  | -2.237117000000 | -0.147766000000 |

-----  
**Pr2F3**

|   |                 |                 |                 |
|---|-----------------|-----------------|-----------------|
| C | 1.671224000000  | 0.331249000000  | 0.900216000000  |
| C | 0.667855000000  | 1.283156000000  | 0.985677000000  |
| C | -0.523910000000 | 0.942550000000  | 1.624869000000  |
| C | -0.693362000000 | -0.333631000000 | 2.163489000000  |
| C | 0.329444000000  | -1.271168000000 | 2.071698000000  |
| C | 1.537689000000  | -0.952880000000 | 1.434390000000  |
| C | 2.591662000000  | -1.914126000000 | 1.302019000000  |
| C | 3.469336000000  | -2.739149000000 | 1.188166000000  |
| H | 0.833006000000  | 2.267809000000  | 0.553265000000  |
| H | -1.635733000000 | -0.602324000000 | 2.635762000000  |
| H | 4.253674000000  | -3.460344000000 | 1.096505000000  |
| C | 0.440700000000  | -2.492763000000 | -1.310393000000 |
| C | -0.334297000000 | -1.339651000000 | -1.417180000000 |
| C | -1.619841000000 | -1.292747000000 | -0.872148000000 |
| C | -2.126439000000 | -2.422860000000 | -0.228026000000 |
| C | -1.353497000000 | -3.578950000000 | -0.122453000000 |
| C | -0.065871000000 | -3.615841000000 | -0.657369000000 |
| C | -2.435028000000 | -0.019000000000 | -1.017147000000 |
| C | -3.448915000000 | 0.172814000000  | 0.023104000000  |
| C | -4.286093000000 | 0.325030000000  | 0.882494000000  |
| H | 1.451404000000  | -2.506142000000 | -1.715507000000 |
| H | 0.073827000000  | -0.457837000000 | -1.912444000000 |
| H | -3.123134000000 | -2.389301000000 | 0.210206000000  |
| H | -1.757081000000 | -4.452855000000 | 0.387328000000  |
| H | 0.545080000000  | -4.511566000000 | -0.558027000000 |
| H | -2.935075000000 | -0.012328000000 | -1.996160000000 |
| H | -1.753565000000 | 0.841307000000  | -1.004531000000 |
| H | -5.035295000000 | 0.466727000000  | 1.632614000000  |
| H | -1.331210000000 | 1.670472000000  | 1.689438000000  |
| H | 0.203209000000  | -2.274695000000 | 2.472109000000  |

F 2.813704000000 0.651218000000 0.267189000000

-----  
**Pr2F4**

C 0.612931000000 -0.913346000000 1.637542000000  
C -0.325706000000 -1.560386000000 2.423529000000  
C -1.416636000000 -0.833993000000 2.895897000000  
C -1.547623000000 0.522325000000 2.591400000000  
C -0.592646000000 1.152925000000 1.801198000000  
C 0.506665000000 0.438757000000 1.299913000000  
C 1.471179000000 1.051423000000 0.436068000000  
C 2.270540000000 1.562467000000 -0.315011000000  
H -0.202769000000 -2.620589000000 2.631832000000  
H -2.406809000000 1.080249000000 2.958894000000  
H 2.986835000000 2.018608000000 -0.965161000000  
C -0.572199000000 -1.905884000000 -1.227214000000  
C -1.556064000000 -0.967954000000 -0.919052000000  
C -2.693547000000 -1.339069000000 -0.198209000000  
C -2.839148000000 -2.668344000000 0.203740000000  
C -1.858587000000 -3.609746000000 -0.107719000000  
C -0.720414000000 -3.231201000000 -0.819831000000  
C -3.751879000000 -0.291022000000 0.101118000000  
C -4.548814000000 -0.560479000000 1.300731000000  
C -5.202842000000 -0.785371000000 2.292895000000  
H 0.321613000000 -1.594597000000 -1.766063000000  
H -1.423883000000 0.071314000000 -1.222594000000  
H -3.716960000000 -2.961879000000 0.778238000000  
H -1.981238000000 -4.643201000000 0.213934000000  
H 0.052538000000 -3.963049000000 -1.048505000000  
H -4.433739000000 -0.203738000000 -0.756863000000  
H -3.263076000000 0.684455000000 0.216841000000  
H -5.795250000000 -0.978526000000 3.162211000000  
H -2.179632000000 -1.333301000000 3.489808000000  
H -0.684556000000 2.207580000000 1.548439000000  
F 1.655392000000 -1.614149000000 1.162536000000

-----  
**Pr2F5**

C -5.199900000000 1.259313000000 8.035397000000  
C -5.636198000000 0.441444000000 9.063612000000  
C -6.858274000000 0.727766000000 9.670307000000  
C -7.616711000000 1.818922000000 9.244928000000  
C -7.160388000000 2.622244000000 8.205027000000  
C -5.939018000000 2.350618000000 7.571791000000  
C -5.453890000000 3.156447000000 6.491402000000  
C -5.057765000000 3.840914000000 5.575630000000  
H -5.015718000000 -0.394770000000 9.378070000000  
H -8.566457000000 2.044522000000 9.725293000000  
H -4.677500000000 4.451887000000 4.784084000000  
C -4.366221000000 3.301680000000 10.747827000000  
C -3.405710000000 3.369047000000 9.741164000000  
C -3.441377000000 4.389807000000 8.786638000000  
C -4.447231000000 5.353282000000 8.863295000000  
C -5.409173000000 5.289105000000 9.872006000000  
C -5.374885000000 4.262762000000 10.814658000000  
C -2.400013000000 4.371494000000 7.680559000000  
C -2.428447000000 5.526625000000 6.782533000000  
C -2.451987000000 6.487336000000 6.048339000000  
H -4.332052000000 2.493362000000 11.476872000000  
H -2.626452000000 2.607863000000 9.682895000000  
H -4.485041000000 6.147290000000 8.119593000000  
H -6.191649000000 6.045354000000 9.918077000000  
H -6.131879000000 4.208533000000 11.595497000000  
H -2.545492000000 3.460552000000 7.082998000000

|   |                 |                |                 |
|---|-----------------|----------------|-----------------|
| H | -1.399563000000 | 4.302234000000 | 8.127957000000  |
| H | -2.455876000000 | 7.336924000000 | 5.398962000000  |
| H | -7.215939000000 | 0.095531000000 | 10.481165000000 |
| F | -4.007352000000 | 1.003542000000 | 7.466568000000  |
| H | -7.739527000000 | 3.478558000000 | 7.866055000000  |

-----  
**Pr2F6**

|   |                 |                 |                 |
|---|-----------------|-----------------|-----------------|
| C | -0.945245000000 | 0.030356000000  | 2.368232000000  |
| C | 0.061355000000  | 0.641552000000  | 1.627060000000  |
| C | 1.128748000000  | -0.114358000000 | 1.138551000000  |
| C | 1.200951000000  | -1.481643000000 | 1.397286000000  |
| C | 0.191888000000  | -2.068533000000 | 2.141735000000  |
| C | -0.898362000000 | -1.345678000000 | 2.635431000000  |
| C | -1.936313000000 | -2.007890000000 | 3.367102000000  |
| C | -2.815004000000 | -2.573202000000 | 3.977346000000  |
| H | -1.793286000000 | 0.601663000000  | 2.738795000000  |
| H | 0.012704000000  | 1.710550000000  | 1.428627000000  |
| H | 2.012141000000  | -2.100584000000 | 1.021399000000  |
| H | -3.583405000000 | -3.073766000000 | 4.527359000000  |
| C | 0.356883000000  | -2.339184000000 | -1.976825000000 |
| C | -0.510684000000 | -1.272970000000 | -1.756551000000 |
| C | -1.615814000000 | -1.414064000000 | -0.910399000000 |
| C | -1.839149000000 | -2.641907000000 | -0.287314000000 |
| C | -0.970384000000 | -3.712804000000 | -0.506476000000 |
| C | 0.128715000000  | -3.565627000000 | -1.349287000000 |
| C | -2.537707000000 | -0.219853000000 | -0.723252000000 |
| C | -3.539798000000 | -0.378952000000 | 0.331246000000  |
| C | -4.356936000000 | -0.534537000000 | 1.208410000000  |
| H | 1.213788000000  | -2.213760000000 | -2.637559000000 |
| H | -0.326486000000 | -0.314272000000 | -2.243504000000 |
| H | -2.685507000000 | -2.755329000000 | 0.389074000000  |
| H | -1.149102000000 | -4.661149000000 | -0.002787000000 |
| H | 0.807105000000  | -4.400874000000 | -1.516733000000 |
| H | -3.052902000000 | -0.011322000000 | -1.671205000000 |
| H | -1.927341000000 | 0.664473000000  | -0.496087000000 |
| H | -5.075440000000 | -0.668114000000 | 1.989060000000  |
| F | 0.250733000000  | -3.387498000000 | 2.385279000000  |
| H | 1.910942000000  | 0.360737000000  | 0.549086000000  |

-----  
**Pr2F7**

|   |                 |                 |                 |
|---|-----------------|-----------------|-----------------|
| C | 1.698663000000  | 0.287268000000  | 0.894687000000  |
| C | 0.680671000000  | 1.231818000000  | 0.971433000000  |
| C | -0.525486000000 | 0.910837000000  | 1.598301000000  |
| C | -0.715058000000 | -0.354032000000 | 2.149952000000  |
| C | 0.313598000000  | -1.279362000000 | 2.066897000000  |
| C | 1.531126000000  | -0.993275000000 | 1.443134000000  |
| C | 2.560181000000  | -1.986113000000 | 1.354492000000  |
| C | 3.435775000000  | -2.816199000000 | 1.263417000000  |
| H | 0.828791000000  | 2.221400000000  | 0.543284000000  |
| H | -1.652097000000 | -0.638649000000 | 2.623138000000  |
| H | 4.210990000000  | -3.549809000000 | 1.196027000000  |
| C | 0.439130000000  | -2.418644000000 | -1.373005000000 |
| C | -0.369148000000 | -1.288427000000 | -1.480381000000 |
| C | -1.635733000000 | -1.262353000000 | -0.892349000000 |
| C | -2.089844000000 | -2.390072000000 | -0.205649000000 |
| C | -1.283178000000 | -3.522242000000 | -0.099151000000 |
| C | -0.014261000000 | -3.538292000000 | -0.676831000000 |
| C | -2.483692000000 | -0.009047000000 | -1.028298000000 |
| C | -3.476642000000 | 0.169329000000  | 0.034413000000  |
| C | -4.294934000000 | 0.310542000000  | 0.913750000000  |
| H | 1.436145000000  | -2.416457000000 | -1.811378000000 |
| H | -0.001438000000 | -0.406829000000 | -2.006405000000 |

|   |                 |                 |                 |
|---|-----------------|-----------------|-----------------|
| H | -3.070124000000 | -2.371045000000 | 0.268845000000  |
| H | -1.640227000000 | -4.388918000000 | 0.454722000000  |
| H | 0.626146000000  | -4.412008000000 | -0.570343000000 |
| H | -3.006615000000 | -0.020628000000 | -1.995209000000 |
| H | -1.821619000000 | 0.866663000000  | -1.037959000000 |
| H | -5.029131000000 | 0.441325000000  | 1.680528000000  |
| H | -1.332537000000 | 1.640016000000  | 1.650536000000  |
| F | 0.134497000000  | -2.496058000000 | 2.603970000000  |
| H | 2.641593000000  | 0.522162000000  | 0.405061000000  |

-----  
**Pr2F8**

|   |                 |                 |                 |
|---|-----------------|-----------------|-----------------|
| C | -1.007583000000 | 0.161723000000  | 2.786525000000  |
| C | -0.193203000000 | 1.178015000000  | 2.313379000000  |
| C | 0.893986000000  | 0.842488000000  | 1.505884000000  |
| C | 1.145054000000  | -0.491440000000 | 1.179420000000  |
| C | 0.311204000000  | -1.496151000000 | 1.660833000000  |
| C | -0.783871000000 | -1.184664000000 | 2.480160000000  |
| C | -1.656494000000 | -2.200762000000 | 2.988070000000  |
| C | -2.384008000000 | -3.067153000000 | 3.416487000000  |
| H | -0.418987000000 | 2.207369000000  | 2.582319000000  |
| H | 1.985932000000  | -0.750968000000 | 0.539646000000  |
| H | -3.026124000000 | -3.830871000000 | 3.801187000000  |
| C | 0.155736000000  | -3.171283000000 | -1.915994000000 |
| C | -0.398091000000 | -1.909070000000 | -1.724509000000 |
| C | -1.528893000000 | -1.739307000000 | -0.917659000000 |
| C | -2.108603000000 | -2.856729000000 | -0.320431000000 |
| C | -1.553153000000 | -4.124477000000 | -0.508596000000 |
| C | -0.419622000000 | -4.286715000000 | -1.301385000000 |
| C | -2.044422000000 | -0.328381000000 | -0.692201000000 |
| C | -3.152102000000 | -0.221912000000 | 0.257831000000  |
| C | -4.048898000000 | -0.151276000000 | 1.065195000000  |
| H | 1.039045000000  | -3.287887000000 | -2.542610000000 |
| H | 0.062776000000  | -1.037306000000 | -2.191347000000 |
| H | -2.979943000000 | -2.731607000000 | 0.319558000000  |
| H | -2.007813000000 | -4.987479000000 | -0.023956000000 |
| H | 0.014441000000  | -5.275115000000 | -1.444420000000 |
| H | -2.351541000000 | 0.105937000000  | -1.653290000000 |
| H | -1.211768000000 | 0.286752000000  | -0.319987000000 |
| H | -4.830714000000 | -0.077776000000 | 1.791146000000  |
| H | 1.544363000000  | 1.630145000000  | 1.129485000000  |
| H | 0.479322000000  | -2.537214000000 | 1.389291000000  |
| F | -2.047817000000 | 0.479216000000  | 3.570836000000  |

-----  
**Pr2F9**

|   |                 |                 |                 |
|---|-----------------|-----------------|-----------------|
| C | 2.689073000000  | -1.965665000000 | 0.757184000000  |
| C | 2.945145000000  | -2.151575000000 | 2.106051000000  |
| C | 2.044135000000  | -1.637165000000 | 3.036838000000  |
| C | 0.909387000000  | -0.945374000000 | 2.613199000000  |
| C | 0.671584000000  | -0.770220000000 | 1.254846000000  |
| C | 1.561027000000  | -1.280600000000 | 0.296371000000  |
| C | 1.330889000000  | -1.102751000000 | -1.106574000000 |
| C | 1.124388000000  | -0.928350000000 | -2.285949000000 |
| H | 3.839981000000  | -2.692667000000 | 2.405296000000  |
| H | 0.218946000000  | -0.527029000000 | 3.342151000000  |
| H | -0.206188000000 | -0.226738000000 | 0.910316000000  |
| H | 0.949021000000  | -0.788286000000 | -3.331500000000 |
| C | 1.193946000000  | 2.657295000000  | 3.311350000000  |
| C | 1.443689000000  | 2.570421000000  | 1.945349000000  |
| C | 2.603693000000  | 1.948539000000  | 1.467285000000  |
| C | 3.511615000000  | 1.419190000000  | 2.381874000000  |
| C | 3.265483000000  | 1.509587000000  | 3.753944000000  |
| C | 2.108489000000  | 2.124931000000  | 4.223765000000  |

|   |                |                 |                 |
|---|----------------|-----------------|-----------------|
| C | 2.827971000000 | 1.891242000000  | -0.034299000000 |
| C | 3.928277000000 | 1.023760000000  | -0.455078000000 |
| C | 4.830140000000 | 0.292039000000  | -0.789815000000 |
| H | 0.286046000000 | 3.142647000000  | 3.667263000000  |
| H | 0.726528000000 | 2.985128000000  | 1.235556000000  |
| H | 4.410218000000 | 0.923518000000  | 2.018305000000  |
| H | 3.983548000000 | 1.090307000000  | 4.457753000000  |
| H | 1.917417000000 | 2.193681000000  | 5.293693000000  |
| H | 3.014071000000 | 2.907983000000  | -0.407712000000 |
| H | 1.908483000000 | 1.541259000000  | -0.523644000000 |
| H | 5.609464000000 | -0.370225000000 | -1.102300000000 |
| H | 2.238085000000 | -1.767535000000 | 4.099959000000  |
| F | 3.548717000000 | -2.473787000000 | -0.139697000000 |

-----  
**Pr2F10**

|   |                 |                 |                 |
|---|-----------------|-----------------|-----------------|
| C | 1.461257000000  | 0.683081000000  | 0.756373000000  |
| C | 2.212920000000  | -0.479745000000 | 0.771271000000  |
| C | 1.679760000000  | -1.611578000000 | 1.387134000000  |
| C | 0.417494000000  | -1.564417000000 | 1.978455000000  |
| C | -0.318090000000 | -0.384237000000 | 1.958600000000  |
| C | 0.193932000000  | 0.767531000000  | 1.341673000000  |
| C | -0.557244000000 | 1.987125000000  | 1.292413000000  |
| C | -1.217335000000 | 2.999717000000  | 1.238770000000  |
| H | 3.192568000000  | -0.484699000000 | 0.298448000000  |
| H | -0.002280000000 | -2.454248000000 | 2.442191000000  |
| H | -1.795596000000 | 3.898579000000  | 1.202343000000  |
| C | 0.334690000000  | -2.587023000000 | -1.616967000000 |
| C | -0.436963000000 | -1.433250000000 | -1.498394000000 |
| C | -1.661818000000 | -1.462491000000 | -0.826748000000 |
| C | -2.104683000000 | -2.665839000000 | -0.274712000000 |
| C | -1.333934000000 | -3.822427000000 | -0.393412000000 |
| C | -0.111995000000 | -3.787388000000 | -1.064133000000 |
| C | -2.484300000000 | -0.188229000000 | -0.742112000000 |
| C | -3.412747000000 | -0.139803000000 | 0.389549000000  |
| C | -4.180326000000 | -0.107566000000 | 1.323410000000  |
| H | 1.292456000000  | -2.545857000000 | -2.134113000000 |
| H | -0.076198000000 | -0.493769000000 | -1.918762000000 |
| H | -3.051813000000 | -2.692075000000 | 0.262563000000  |
| H | -1.689943000000 | -4.755309000000 | 0.041921000000  |
| H | 0.490563000000  | -4.690110000000 | -1.153541000000 |
| H | -3.060951000000 | -0.067475000000 | -1.670353000000 |
| H | -1.811201000000 | 0.675970000000  | -0.675230000000 |
| H | -4.863110000000 | -0.064102000000 | 2.145357000000  |
| H | 2.251763000000  | -2.537597000000 | 1.394295000000  |
| H | -1.312478000000 | -0.337396000000 | 2.397967000000  |
| F | 1.965691000000  | 1.773002000000  | 0.151771000000  |

-----  
**Pr2F11**

|   |                 |                 |                 |
|---|-----------------|-----------------|-----------------|
| C | 0.843573000000  | 0.352495000000  | 2.099799000000  |
| C | -0.229246000000 | -0.467306000000 | 2.412335000000  |
| C | -1.438681000000 | 0.123783000000  | 2.769339000000  |
| C | -1.558629000000 | 1.514817000000  | 2.819049000000  |
| C | -0.469426000000 | 2.319234000000  | 2.504245000000  |
| C | 0.758547000000  | 1.747626000000  | 2.129569000000  |
| C | 1.888703000000  | 2.557507000000  | 1.782704000000  |
| C | 2.833206000000  | 3.253134000000  | 1.487129000000  |
| H | -0.114302000000 | -1.546980000000 | 2.330505000000  |
| H | -2.509494000000 | 1.970795000000  | 3.085394000000  |
| H | -0.549842000000 | 3.403822000000  | 2.531717000000  |
| H | 3.672602000000  | 3.864238000000  | 1.230166000000  |
| C | 0.617021000000  | -2.415112000000 | -0.699049000000 |
| C | 0.082827000000  | -1.136511000000 | -0.824533000000 |

|   |                 |                 |                 |
|---|-----------------|-----------------|-----------------|
| C | -1.267764000000 | -0.896451000000 | -0.549805000000 |
| C | -2.081457000000 | -1.961647000000 | -0.168050000000 |
| C | -1.548363000000 | -3.247037000000 | -0.043807000000 |
| C | -0.199181000000 | -3.477527000000 | -0.303522000000 |
| C | -1.770291000000 | 0.534325000000  | -0.634437000000 |
| C | -3.163046000000 | 0.724636000000  | -0.228385000000 |
| C | -4.313890000000 | 0.872155000000  | 0.112233000000  |
| H | 1.674250000000  | -2.581981000000 | -0.899289000000 |
| H | 0.729873000000  | -0.304991000000 | -1.107796000000 |
| H | -3.133188000000 | -1.782271000000 | 0.049398000000  |
| H | -2.193133000000 | -4.070897000000 | 0.259532000000  |
| H | 0.216554000000  | -4.478612000000 | -0.200201000000 |
| H | -1.647846000000 | 0.902919000000  | -1.661862000000 |
| H | -1.133213000000 | 1.164413000000  | 0.003629000000  |
| H | -5.333584000000 | 1.016934000000  | 0.400370000000  |
| H | -2.298436000000 | -0.506821000000 | 2.988046000000  |
| F | 2.005943000000  | -0.212943000000 | 1.734564000000  |

-----  
**Pr2F12**

|   |                |                 |                 |
|---|----------------|-----------------|-----------------|
| C | 5.930348000000 | 2.383911000000  | -0.594688000000 |
| C | 6.033061000000 | 3.671312000000  | -0.075586000000 |
| C | 5.898660000000 | 3.884347000000  | 1.298167000000  |
| C | 5.656825000000 | 2.813528000000  | 2.156584000000  |
| C | 5.555823000000 | 1.540335000000  | 1.618456000000  |
| C | 5.691661000000 | 1.288656000000  | 0.249222000000  |
| C | 5.601898000000 | -0.046141000000 | -0.263024000000 |
| C | 5.550717000000 | -1.169164000000 | -0.709716000000 |
| H | 6.034825000000 | 2.202937000000  | -1.662351000000 |
| H | 6.219688000000 | 4.509513000000  | -0.743803000000 |
| H | 5.516319000000 | 2.952362000000  | 3.227235000000  |
| H | 5.505781000000 | -2.162974000000 | -1.102226000000 |
| C | 2.880946000000 | 4.776255000000  | 4.111051000000  |
| C | 2.664787000000 | 4.445788000000  | 2.776636000000  |
| C | 2.526205000000 | 3.109621000000  | 2.384305000000  |
| C | 2.586646000000 | 2.109566000000  | 3.353040000000  |
| C | 2.802301000000 | 2.438482000000  | 4.693476000000  |
| C | 2.955470000000 | 3.768842000000  | 5.076696000000  |
| C | 2.372996000000 | 2.809810000000  | 0.903329000000  |
| C | 2.280285000000 | 1.388443000000  | 0.570540000000  |
| C | 2.228288000000 | 0.208918000000  | 0.312063000000  |
| H | 2.992133000000 | 5.820240000000  | 4.401371000000  |
| H | 2.620704000000 | 5.232889000000  | 2.022470000000  |
| H | 2.491684000000 | 1.067139000000  | 3.054395000000  |
| H | 2.856485000000 | 1.646791000000  | 5.439351000000  |
| H | 3.127582000000 | 4.023438000000  | 6.121370000000  |
| H | 3.240795000000 | 3.232253000000  | 0.374386000000  |
| H | 1.485534000000 | 3.328683000000  | 0.516728000000  |
| H | 2.198174000000 | -0.831523000000 | 0.067610000000  |
| F | 5.316023000000 | 0.507838000000  | 2.440819000000  |
| H | 5.970643000000 | 4.890430000000  | 1.707579000000  |

-----  
**Pr2F13**

|   |                 |                 |                |
|---|-----------------|-----------------|----------------|
| C | 1.844079000000  | 0.546786000000  | 0.710787000000 |
| C | 2.475464000000  | -0.682842000000 | 0.855859000000 |
| C | 1.811217000000  | -1.740214000000 | 1.481321000000 |
| C | 0.517507000000  | -1.571532000000 | 1.967108000000 |
| C | -0.092538000000 | -0.337432000000 | 1.814171000000 |
| C | 0.538581000000  | 0.741428000000  | 1.188377000000 |
| C | -0.140332000000 | 1.993232000000  | 1.027321000000 |
| C | -0.715816000000 | 3.047013000000  | 0.875801000000 |
| H | 2.347689000000  | 1.378875000000  | 0.223010000000 |
| H | 3.486533000000  | -0.819289000000 | 0.477833000000 |

|   |                 |                 |                 |
|---|-----------------|-----------------|-----------------|
| H | -0.033094000000 | -2.379864000000 | 2.442155000000  |
| H | -1.221928000000 | 3.981542000000  | 0.754736000000  |
| C | 0.215805000000  | -2.225971000000 | -1.542133000000 |
| C | -0.679355000000 | -1.178305000000 | -1.353411000000 |
| C | -1.871223000000 | -1.373601000000 | -0.644367000000 |
| C | -2.149749000000 | -2.636974000000 | -0.126095000000 |
| C | -1.252386000000 | -3.691645000000 | -0.316189000000 |
| C | -0.070409000000 | -3.491566000000 | -1.023817000000 |
| C | -2.801602000000 | -0.186011000000 | -0.466959000000 |
| C | -4.012507000000 | -0.461561000000 | 0.306088000000  |
| C | -5.012152000000 | -0.703163000000 | 0.941017000000  |
| H | 1.141848000000  | -2.055360000000 | -2.089267000000 |
| H | -0.449223000000 | -0.188215000000 | -1.749850000000 |
| H | -3.072149000000 | -2.795368000000 | 0.430039000000  |
| H | -1.484559000000 | -4.675287000000 | 0.090255000000  |
| H | 0.627439000000  | -4.314581000000 | -1.171216000000 |
| H | -3.094522000000 | 0.186225000000  | -1.458239000000 |
| H | -2.251105000000 | 0.630260000000  | 0.021123000000  |
| H | -5.898709000000 | -0.900120000000 | 1.505623000000  |
| F | -1.345946000000 | -0.175136000000 | 2.267382000000  |
| H | 2.298808000000  | -2.708054000000 | 1.583014000000  |

-----  
**Pr2F14**

|   |                 |                 |                 |
|---|-----------------|-----------------|-----------------|
| C | -0.055718000000 | 3.271232000000  | -4.601558000000 |
| C | -0.615437000000 | 3.015423000000  | -5.842725000000 |
| C | -1.012063000000 | 1.712159000000  | -6.140823000000 |
| C | -0.846581000000 | 0.693411000000  | -5.201707000000 |
| C | -0.281947000000 | 0.971306000000  | -3.961467000000 |
| C | 0.127663000000  | 2.273806000000  | -3.638351000000 |
| C | 0.702154000000  | 2.583971000000  | -2.362576000000 |
| C | 1.162096000000  | 2.838413000000  | -1.272789000000 |
| H | -0.730743000000 | 3.832234000000  | -6.551836000000 |
| H | -1.163814000000 | -0.321902000000 | -5.431326000000 |
| H | -0.162190000000 | 0.186661000000  | -3.216551000000 |
| H | 1.550382000000  | 3.068053000000  | -0.303137000000 |
| C | -2.903469000000 | -0.849729000000 | -2.555144000000 |
| C | -2.996728000000 | 0.452285000000  | -2.069050000000 |
| C | -2.127103000000 | 0.907462000000  | -1.072985000000 |
| C | -1.161363000000 | 0.035607000000  | -0.568062000000 |
| C | -1.063808000000 | -1.268920000000 | -1.055123000000 |
| C | -1.932857000000 | -1.716214000000 | -2.049976000000 |
| C | -2.242517000000 | 2.348985000000  | -0.607948000000 |
| C | -1.571372000000 | 2.638191000000  | 0.660175000000  |
| C | -1.025497000000 | 2.864351000000  | 1.715175000000  |
| H | -3.588975000000 | -1.188342000000 | -3.330757000000 |
| H | -3.751370000000 | 1.127831000000  | -2.473053000000 |
| H | -0.482155000000 | 0.382507000000  | 0.208685000000  |
| H | -0.306389000000 | -1.939212000000 | -0.651646000000 |
| H | -1.858827000000 | -2.735842000000 | -2.424963000000 |
| H | -3.303686000000 | 2.610772000000  | -0.508599000000 |
| H | -1.821491000000 | 3.006976000000  | -1.381843000000 |
| H | -0.556798000000 | 3.077318000000  | 2.652573000000  |
| H | -1.453191000000 | 1.496125000000  | -7.112466000000 |
| F | 0.324988000000  | 4.526590000000  | -4.310486000000 |

-----  
**Pr2F15**

|   |                 |                 |                |
|---|-----------------|-----------------|----------------|
| C | -0.768951000000 | -0.469453000000 | 2.082713000000 |
| C | -0.218283000000 | 0.439906000000  | 1.187129000000 |
| C | 1.067764000000  | 0.234502000000  | 0.683228000000 |
| C | 1.802804000000  | -0.885367000000 | 1.064888000000 |
| C | 1.231904000000  | -1.780898000000 | 1.953826000000 |
| C | -0.045833000000 | -1.601352000000 | 2.490143000000 |



|   |                 |                 |                 |
|---|-----------------|-----------------|-----------------|
| C | -0.590170000000 | -2.541432000000 | 3.423748000000  |
| C | -1.074871000000 | -3.327841000000 | 4.204618000000  |
| H | -1.769305000000 | -0.324495000000 | 2.485828000000  |
| H | -0.790693000000 | 1.313935000000  | 0.883240000000  |
| H | 2.801556000000  | -1.080931000000 | 0.681347000000  |
| H | -1.511472000000 | -4.026966000000 | 4.885802000000  |
| C | -3.939533000000 | -5.009704000000 | 2.535914000000  |
| C | -2.763476000000 | -5.113350000000 | 1.799071000000  |
| C | -2.305001000000 | -4.037775000000 | 1.031727000000  |
| C | -3.053936000000 | -2.863049000000 | 0.996565000000  |
| C | -4.231670000000 | -2.754615000000 | 1.738933000000  |
| C | -4.675447000000 | -3.822802000000 | 2.514458000000  |
| C | -0.973151000000 | -4.177368000000 | 0.315882000000  |
| C | -0.662470000000 | -3.091554000000 | -0.614668000000 |
| C | -0.422778000000 | -2.184957000000 | -1.377581000000 |
| H | -4.284668000000 | -5.855525000000 | 3.129428000000  |
| H | -2.183566000000 | -6.036646000000 | 1.829522000000  |
| H | -2.706908000000 | -2.026718000000 | 0.391466000000  |
| H | -4.806057000000 | -1.829482000000 | 1.707708000000  |
| H | -5.594156000000 | -3.737524000000 | 3.092856000000  |
| H | -0.952407000000 | -5.129532000000 | -0.230148000000 |
| H | -0.175805000000 | -4.233070000000 | 1.072874000000  |
| H | -0.197531000000 | -1.389230000000 | -2.055115000000 |
| H | 1.501666000000  | 0.948083000000  | -0.015288000000 |
| F | 1.931903000000  | -2.871595000000 | 2.313546000000  |

-----  
**Pr2F16**

|   |                |                 |                 |
|---|----------------|-----------------|-----------------|
| C | 6.125862000000 | 1.694994000000  | 1.676355000000  |
| C | 6.248133000000 | 1.625600000000  | 0.296526000000  |
| C | 6.459422000000 | 2.802382000000  | -0.417958000000 |
| C | 6.543009000000 | 4.026860000000  | 0.250901000000  |
| C | 6.420413000000 | 4.074053000000  | 1.635707000000  |
| C | 6.211059000000 | 2.900866000000  | 2.378156000000  |
| C | 6.084647000000 | 2.931672000000  | 3.803967000000  |
| C | 5.980061000000 | 2.977635000000  | 5.007693000000  |
| H | 6.158238000000 | 0.659540000000  | -0.193913000000 |
| H | 6.705405000000 | 4.945194000000  | -0.309407000000 |
| H | 6.482694000000 | 5.019658000000  | 2.170395000000  |
| H | 5.874216000000 | 3.012319000000  | 6.071012000000  |
| C | 2.747422000000 | 4.563725000000  | 4.324479000000  |
| C | 2.891487000000 | 4.308301000000  | 2.964876000000  |
| C | 2.835586000000 | 2.998444000000  | 2.473427000000  |
| C | 2.647583000000 | 1.947296000000  | 3.368878000000  |
| C | 2.500985000000 | 2.202165000000  | 4.734299000000  |
| C | 2.544482000000 | 3.507420000000  | 5.215600000000  |
| C | 2.971172000000 | 2.789512000000  | 0.974221000000  |
| C | 2.919257000000 | 1.393839000000  | 0.538224000000  |
| C | 2.863521000000 | 0.237611000000  | 0.189038000000  |
| H | 2.790987000000 | 5.588165000000  | 4.691751000000  |
| H | 3.048027000000 | 5.134775000000  | 2.270054000000  |
| H | 2.616398000000 | 0.924584000000  | 2.997509000000  |
| H | 2.352573000000 | 1.371351000000  | 5.422688000000  |
| H | 2.426571000000 | 3.704771000000  | 6.280226000000  |
| H | 3.917772000000 | 3.231503000000  | 0.632714000000  |
| H | 2.169087000000 | 3.342231000000  | 0.466162000000  |
| H | 2.812162000000 | -0.783439000000 | -0.124750000000 |
| H | 6.552477000000 | 2.763240000000  | -1.501540000000 |
| F | 5.915359000000 | 0.563256000000  | 2.363846000000  |

-----  
**Pr2F17**

|   |                 |                 |                |
|---|-----------------|-----------------|----------------|
| C | 0.886770000000  | 0.403940000000  | 2.117246000000 |
| C | -0.201066000000 | -0.415536000000 | 2.397952000000 |

|   |                 |                 |                 |
|---|-----------------|-----------------|-----------------|
| C | -1.431000000000 | 0.149677000000  | 2.736776000000  |
| C | -1.576359000000 | 1.534829000000  | 2.805041000000  |
| C | -0.478729000000 | 2.333116000000  | 2.526745000000  |
| C | 0.766585000000  | 1.801846000000  | 2.173709000000  |
| C | 1.873203000000  | 2.662960000000  | 1.878326000000  |
| C | 2.814226000000  | 3.378543000000  | 1.622034000000  |
| H | -0.098855000000 | -1.496446000000 | 2.316873000000  |
| H | -2.526279000000 | 2.003924000000  | 3.050420000000  |
| H | 3.644226000000  | 4.016026000000  | 1.401333000000  |
| C | 0.564691000000  | -2.517529000000 | -0.814523000000 |
| C | 0.055667000000  | -1.227550000000 | -0.929285000000 |
| C | -1.266387000000 | -0.946230000000 | -0.568183000000 |
| C | -2.077783000000 | -1.982600000000 | -0.110268000000 |
| C | -1.569636000000 | -3.278908000000 | 0.006125000000  |
| C | -0.247967000000 | -3.550157000000 | -0.339510000000 |
| C | -1.737424000000 | 0.495249000000  | -0.647207000000 |
| C | -3.123335000000 | 0.715420000000  | -0.233133000000 |
| C | -4.268730000000 | 0.887431000000  | 0.114150000000  |
| H | 1.597610000000  | -2.720467000000 | -1.094221000000 |
| H | 0.697402000000  | -0.419775000000 | -1.283841000000 |
| H | -3.108905000000 | -1.772171000000 | 0.169335000000  |
| H | -2.212925000000 | -4.079549000000 | 0.368819000000  |
| H | 0.148017000000  | -4.560181000000 | -0.246146000000 |
| H | -1.613000000000 | 0.862476000000  | -1.674664000000 |
| H | -1.081020000000 | 1.109163000000  | -0.012269000000 |
| H | -5.283362000000 | 1.056286000000  | 0.407242000000  |
| H | -2.291285000000 | -0.488961000000 | 2.928825000000  |
| F | -0.614992000000 | 3.668169000000  | 2.586879000000  |
| H | 1.847307000000  | -0.024275000000 | 1.838026000000  |

---

**Pr2F18**

|   |                 |                 |                 |
|---|-----------------|-----------------|-----------------|
| C | 3.085481000000  | 0.674685000000  | 3.073853000000  |
| C | 4.389274000000  | 0.211228000000  | 3.003399000000  |
| C | 4.794531000000  | -0.472861000000 | 1.858048000000  |
| C | 3.898461000000  | -0.680997000000 | 0.808456000000  |
| C | 2.594661000000  | -0.205743000000 | 0.898597000000  |
| C | 2.162303000000  | 0.484645000000  | 2.041089000000  |
| C | 0.821027000000  | 0.975308000000  | 2.159694000000  |
| C | -0.314872000000 | 1.381751000000  | 2.256910000000  |
| H | 5.062162000000  | 0.390327000000  | 3.839191000000  |
| H | 4.213079000000  | -1.218869000000 | -0.083819000000 |
| H | 1.888263000000  | -0.371476000000 | 0.087769000000  |
| H | -1.330039000000 | 1.712337000000  | 2.334570000000  |
| C | 1.064415000000  | -2.390317000000 | -1.643285000000 |
| C | 0.129724000000  | -1.355902000000 | -1.677107000000 |
| C | -0.656478000000 | -1.067792000000 | -0.556742000000 |
| C | -0.497628000000 | -1.834976000000 | 0.598834000000  |
| C | 0.439347000000  | -2.867784000000 | 0.635490000000  |
| C | 1.222840000000  | -3.149115000000 | -0.483083000000 |
| C | -1.615261000000 | 0.108566000000  | -0.618331000000 |
| C | -2.701105000000 | 0.064312000000  | 0.362949000000  |
| C | -3.596521000000 | 0.021848000000  | 1.174480000000  |
| H | 1.665967000000  | -2.605359000000 | -2.525285000000 |
| H | 0.008743000000  | -0.765190000000 | -2.585672000000 |
| H | -1.103844000000 | -1.613752000000 | 1.475440000000  |
| H | 0.559733000000  | -3.453115000000 | 1.545584000000  |
| H | 1.953682000000  | -3.955510000000 | -0.451367000000 |
| H | -2.052566000000 | 0.167317000000  | -1.623018000000 |
| H | -1.044096000000 | 1.035809000000  | -0.463002000000 |
| H | -4.396459000000 | -0.015985000000 | 1.883557000000  |
| F | 2.692557000000  | 1.331995000000  | 4.177773000000  |
| H | 5.815963000000  | -0.843328000000 | 1.789135000000  |

-----  
**Pr2F19**

|   |                 |                 |                 |
|---|-----------------|-----------------|-----------------|
| C | -0.794616000000 | -0.482202000000 | 2.050239000000  |
| C | -0.245070000000 | 0.406193000000  | 1.139951000000  |
| C | 1.048535000000  | 0.176096000000  | 0.676164000000  |
| C | 1.769176000000  | -0.932781000000 | 1.121366000000  |
| C | 1.198336000000  | -1.811743000000 | 2.034477000000  |
| C | -0.102025000000 | -1.601920000000 | 2.520588000000  |
| C | -0.702765000000 | -2.490350000000 | 3.470127000000  |
| C | -1.215875000000 | -3.242666000000 | 4.266304000000  |
| H | -0.832749000000 | 1.261546000000  | 0.813930000000  |
| H | 2.777285000000  | -1.113271000000 | 0.754406000000  |
| H | -1.684270000000 | -3.911360000000 | 4.956862000000  |
| C | -3.862719000000 | -5.024197000000 | 2.534204000000  |
| C | -2.724549000000 | -5.131076000000 | 1.741089000000  |
| C | -2.276880000000 | -4.041344000000 | 0.987094000000  |
| C | -2.996416000000 | -2.849197000000 | 1.024783000000  |
| C | -4.133929000000 | -2.736571000000 | 1.826040000000  |
| C | -4.568511000000 | -3.819494000000 | 2.585043000000  |
| C | -0.981426000000 | -4.188152000000 | 0.208309000000  |
| C | -0.678599000000 | -3.079643000000 | -0.697221000000 |
| C | -0.440750000000 | -2.157326000000 | -1.441507000000 |
| H | -4.201042000000 | -5.880701000000 | 3.116320000000  |
| H | -2.167443000000 | -6.068495000000 | 1.714803000000  |
| H | -2.657572000000 | -1.998954000000 | 0.434979000000  |
| H | -4.674252000000 | -1.791991000000 | 1.861491000000  |
| H | -5.455458000000 | -3.730833000000 | 3.210608000000  |
| H | -1.007652000000 | -5.121467000000 | -0.369190000000 |
| H | -0.154655000000 | -4.286497000000 | 0.928157000000  |
| H | -0.220232000000 | -1.347384000000 | -2.103523000000 |
| H | 1.493857000000  | 0.867021000000  | -0.037722000000 |
| F | -2.037105000000 | -0.251432000000 | 2.505247000000  |
| H | 1.752158000000  | -2.676803000000 | 2.394351000000  |

-----

**PrBz-3FPHA Hetero-Dimer**

**Pr3F1**

|   |                 |                 |                 |
|---|-----------------|-----------------|-----------------|
| C | 2.192317000000  | -1.535114000000 | 0.379344000000  |
| C | 2.783416000000  | -2.104197000000 | 1.495418000000  |
| C | 2.244773000000  | -1.994568000000 | 2.768895000000  |
| C | 1.059591000000  | -1.275096000000 | 2.925554000000  |
| C | 0.438494000000  | -0.683732000000 | 1.830969000000  |
| C | 1.004585000000  | -0.812988000000 | 0.554279000000  |
| C | 0.385866000000  | -0.180020000000 | -0.577432000000 |
| C | -0.118587000000 | 0.372756000000  | -1.529434000000 |
| H | 2.658612000000  | -1.637415000000 | -0.597366000000 |
| H | 0.624935000000  | -1.164607000000 | 3.917143000000  |
| H | -0.473586000000 | -0.105059000000 | 1.953770000000  |
| H | -0.578473000000 | 0.841830000000  | -2.373448000000 |
| C | 0.896997000000  | 2.876344000000  | 2.343830000000  |
| C | 1.579173000000  | 2.583564000000  | 1.167109000000  |
| C | 2.773128000000  | 1.852734000000  | 1.197078000000  |
| C | 3.273033000000  | 1.421972000000  | 2.424545000000  |
| C | 2.591989000000  | 1.719754000000  | 3.607070000000  |
| C | 1.403893000000  | 2.444621000000  | 3.572168000000  |
| C | 3.474330000000  | 1.567934000000  | -0.120638000000 |
| C | 4.603042000000  | 0.640884000000  | -0.028236000000 |
| C | 5.525051000000  | -0.135591000000 | 0.064840000000  |
| H | -0.032735000000 | 3.442418000000  | 2.304619000000  |

|   |                |                 |                 |
|---|----------------|-----------------|-----------------|
| H | 1.175592000000 | 2.910995000000  | 0.208497000000  |
| H | 4.194398000000 | 0.842586000000  | 2.454984000000  |
| H | 2.993029000000 | 1.375600000000  | 4.559653000000  |
| H | 0.872745000000 | 2.674657000000  | 4.494669000000  |
| H | 3.828821000000 | 2.515150000000  | -0.550126000000 |
| H | 2.738763000000 | 1.162433000000  | -0.829896000000 |
| H | 6.334858000000 | -0.830462000000 | 0.138481000000  |
| H | 2.752720000000 | -2.461072000000 | 3.610070000000  |
| F | 3.930149000000 | -2.794862000000 | 1.334449000000  |

-----  
**Pr3F2**

|   |                 |                 |                 |
|---|-----------------|-----------------|-----------------|
| C | 0.353613000000  | -1.129083000000 | 1.833621000000  |
| C | -0.644955000000 | -1.562177000000 | 2.688539000000  |
| C | -1.653182000000 | -0.729925000000 | 3.153847000000  |
| C | -1.647923000000 | 0.603026000000  | 2.745633000000  |
| C | -0.661780000000 | 1.076977000000  | 1.884444000000  |
| C | 0.337666000000  | 0.209020000000  | 1.420019000000  |
| C | 1.330264000000  | 0.678861000000  | 0.493936000000  |
| C | 2.152095000000  | 1.068730000000  | -0.304798000000 |
| H | 1.108783000000  | -1.823056000000 | 1.474510000000  |
| H | -0.658792000000 | 2.114677000000  | 1.558112000000  |
| H | 2.889452000000  | 1.418698000000  | -0.995989000000 |
| C | -0.481197000000 | -1.721762000000 | -1.481936000000 |
| C | -1.489379000000 | -0.828204000000 | -1.130838000000 |
| C | -2.526520000000 | -1.220625000000 | -0.278400000000 |
| C | -2.539105000000 | -2.524132000000 | 0.218557000000  |
| C | -1.529187000000 | -3.421902000000 | -0.130709000000 |
| C | -0.499208000000 | -3.024744000000 | -0.981204000000 |
| C | -3.612175000000 | -0.209208000000 | 0.050071000000  |
| C | -4.501488000000 | -0.588028000000 | 1.149354000000  |
| C | -5.233077000000 | -0.902086000000 | 2.059600000000  |
| H | 0.327269000000  | -1.395118000000 | -2.134114000000 |
| H | -1.460470000000 | 0.194475000000  | -1.509596000000 |
| H | -3.334319000000 | -2.833038000000 | 0.895477000000  |
| H | -1.544607000000 | -4.432867000000 | 0.273372000000  |
| H | 0.290042000000  | -3.725166000000 | -1.250172000000 |
| H | -4.223441000000 | -0.034712000000 | -0.846528000000 |
| H | -3.138103000000 | 0.749523000000  | 0.297789000000  |
| H | -5.894066000000 | -1.175372000000 | 2.854838000000  |
| H | -2.428367000000 | -1.129754000000 | 3.802854000000  |
| H | -2.434284000000 | 1.270900000000  | 3.093443000000  |
| F | -0.648641000000 | -2.855592000000 | 3.068699000000  |

-----  
**Pr3F3**

|   |                 |                 |                 |
|---|-----------------|-----------------|-----------------|
| C | 1.723526000000  | 0.365118000000  | 0.933640000000  |
| C | 0.656917000000  | 1.242123000000  | 1.038337000000  |
| C | -0.549641000000 | 0.895511000000  | 1.629456000000  |
| C | -0.686438000000 | -0.397732000000 | 2.133557000000  |
| C | 0.362185000000  | -1.308602000000 | 2.048777000000  |
| C | 1.569905000000  | -0.930429000000 | 1.446341000000  |
| C | 2.643393000000  | -1.877419000000 | 1.323774000000  |
| C | 3.541943000000  | -2.679995000000 | 1.206558000000  |
| H | 2.648835000000  | 0.679015000000  | 0.457075000000  |
| H | 0.248971000000  | -2.322940000000 | 2.423251000000  |
| H | 4.340950000000  | -3.385311000000 | 1.116762000000  |
| C | 0.435021000000  | -2.474613000000 | -1.299342000000 |
| C | -0.339056000000 | -1.320360000000 | -1.402011000000 |
| C | -1.635077000000 | -1.284411000000 | -0.882599000000 |
| C | -2.153189000000 | -2.426634000000 | -0.268982000000 |
| C | -1.382061000000 | -3.584326000000 | -0.169712000000 |
| C | -0.083766000000 | -3.610501000000 | -0.679031000000 |
| C | -2.450126000000 | -0.009312000000 | -1.017478000000 |

|   |                 |                 |                 |
|---|-----------------|-----------------|-----------------|
| C | -3.457290000000 | 0.174187000000  | 0.031079000000  |
| C | -4.286713000000 | 0.318762000000  | 0.899314000000  |
| H | 1.453816000000  | -2.480491000000 | -1.684011000000 |
| H | 0.077797000000  | -0.428835000000 | -1.871764000000 |
| H | -3.158497000000 | -2.401660000000 | 0.149866000000  |
| H | -1.795249000000 | -4.467740000000 | 0.315387000000  |
| H | 0.525415000000  | -4.508044000000 | -0.585078000000 |
| H | -2.956704000000 | 0.002435000000  | -1.993054000000 |
| H | -1.770166000000 | 0.852456000000  | -1.004884000000 |
| H | -5.030327000000 | 0.455133000000  | 1.655942000000  |
| H | -1.362948000000 | 1.617099000000  | 1.673737000000  |
| F | 0.795822000000  | 2.486502000000  | 0.530925000000  |
| H | -1.634011000000 | -0.698866000000 | 2.576044000000  |

-----  
**Pr3F4**

|   |                 |                 |                 |
|---|-----------------|-----------------|-----------------|
| C | -0.078730000000 | -0.549287000000 | 2.408742000000  |
| C | 1.255257000000  | -0.872128000000 | 2.230745000000  |
| C | 2.171423000000  | -0.003353000000 | 1.654447000000  |
| C | 1.719611000000  | 1.248252000000  | 1.236869000000  |
| C | 0.384231000000  | 1.608329000000  | 1.394146000000  |
| C | -0.519922000000 | 0.708248000000  | 1.978531000000  |
| C | -1.907462000000 | 1.057663000000  | 2.099997000000  |
| C | -3.083277000000 | 1.341449000000  | 2.142507000000  |
| H | -0.765280000000 | -1.269923000000 | 2.844932000000  |
| H | 2.419466000000  | 1.948549000000  | 0.784468000000  |
| H | 0.029863000000  | 2.584227000000  | 1.069274000000  |
| H | -4.122620000000 | 1.591318000000  | 2.176905000000  |
| C | 0.356310000000  | -2.109480000000 | -0.679729000000 |
| C | -0.279819000000 | -0.940499000000 | -1.088365000000 |
| C | -1.629944000000 | -0.721464000000 | -0.793919000000 |
| C | -2.333210000000 | -1.691215000000 | -0.080157000000 |
| C | -1.695617000000 | -2.863244000000 | 0.332805000000  |
| C | -0.351707000000 | -3.077565000000 | 0.035001000000  |
| C | -2.261803000000 | 0.587869000000  | -1.234022000000 |
| C | -3.720736000000 | 0.637184000000  | -1.130095000000 |
| C | -4.927058000000 | 0.667464000000  | -1.052824000000 |
| H | 1.408995000000  | -2.263807000000 | -0.912946000000 |
| H | 0.279901000000  | -0.182782000000 | -1.638237000000 |
| H | -3.383095000000 | -1.525545000000 | 0.155547000000  |
| H | -2.256419000000 | -3.613574000000 | 0.888618000000  |
| H | 0.145347000000  | -3.989211000000 | 0.362198000000  |
| H | -1.979135000000 | 0.790149000000  | -2.275293000000 |
| H | -1.843006000000 | 1.404010000000  | -0.627107000000 |
| H | -5.994609000000 | 0.701687000000  | -0.998335000000 |
| H | 3.207699000000  | -0.312436000000 | 1.537639000000  |
| F | 1.679421000000  | -2.090893000000 | 2.621276000000  |

-----  
**Pr3F5**

|   |                 |                 |                 |
|---|-----------------|-----------------|-----------------|
| C | -0.806427000000 | 0.033882000000  | 2.268942000000  |
| C | 0.135977000000  | 0.804899000000  | 1.593387000000  |
| C | 1.270237000000  | 0.215332000000  | 1.035064000000  |
| C | 1.433979000000  | -1.155711000000 | 1.177855000000  |
| C | 0.523637000000  | -1.955243000000 | 1.845695000000  |
| C | -0.615124000000 | -1.349795000000 | 2.394254000000  |
| C | -1.592067000000 | -2.156973000000 | 3.070626000000  |
| C | -2.416410000000 | -2.841608000000 | 3.633266000000  |
| H | -1.700207000000 | 0.487062000000  | 2.690160000000  |
| H | 0.683723000000  | -3.027707000000 | 1.918226000000  |
| H | -3.140905000000 | -3.443804000000 | 4.139301000000  |
| C | 0.203832000000  | -2.581285000000 | -1.639048000000 |
| C | -0.583165000000 | -1.441852000000 | -1.488225000000 |
| C | -1.787920000000 | -1.494935000000 | -0.780511000000 |

|   |                 |                 |                 |
|---|-----------------|-----------------|-----------------|
| C | -2.198762000000 | -2.709839000000 | -0.230831000000 |
| C | -1.412966000000 | -3.852573000000 | -0.381174000000 |
| C | -0.209812000000 | -3.792381000000 | -1.083136000000 |
| C | -2.617967000000 | -0.227926000000 | -0.655019000000 |
| C | -3.608735000000 | -0.259182000000 | 0.422510000000  |
| C | -4.418351000000 | -0.307914000000 | 1.319075000000  |
| H | 1.147784000000  | -2.521488000000 | -2.178428000000 |
| H | -0.250360000000 | -0.493661000000 | -1.912245000000 |
| H | -3.123357000000 | -2.754836000000 | 0.342120000000  |
| H | -1.739953000000 | -4.791984000000 | 0.062506000000  |
| H | 0.406994000000  | -4.683054000000 | -1.192888000000 |
| H | -3.136322000000 | -0.036212000000 | -1.605165000000 |
| H | -1.943176000000 | 0.621542000000  | -0.486124000000 |
| H | -5.133902000000 | -0.344708000000 | 2.112998000000  |
| H | 2.018336000000  | 0.794032000000  | 0.497880000000  |
| F | 2.521733000000  | -1.735872000000 | 0.630308000000  |
| H | -0.012510000000 | 1.879354000000  | 1.498892000000  |

-----  
**Pr3F6**

|   |                 |                 |                 |
|---|-----------------|-----------------|-----------------|
| C | 1.178477000000  | 0.617974000000  | 0.849152000000  |
| C | 1.820826000000  | -0.616729000000 | 0.821995000000  |
| C | 1.285295000000  | -1.712754000000 | 1.496330000000  |
| C | 0.098256000000  | -1.536164000000 | 2.192216000000  |
| C | -0.571270000000 | -0.325179000000 | 2.245172000000  |
| C | -0.021160000000 | 0.767038000000  | 1.561190000000  |
| C | -0.707910000000 | 2.029313000000  | 1.566586000000  |
| C | -1.308134000000 | 3.080154000000  | 1.549467000000  |
| H | 1.593701000000  | 1.473090000000  | 0.320739000000  |
| H | -1.511523000000 | -0.237224000000 | 2.782436000000  |
| H | -1.832922000000 | 4.011992000000  | 1.546973000000  |
| C | 0.476100000000  | -2.627073000000 | -1.911766000000 |
| C | -0.287977000000 | -1.469730000000 | -1.788095000000 |
| C | -1.409969000000 | -1.439813000000 | -0.952865000000 |
| C | -1.753311000000 | -2.589543000000 | -0.241178000000 |
| C | -0.986747000000 | -3.749832000000 | -0.359715000000 |
| C | 0.128307000000  | -3.773439000000 | -1.195034000000 |
| C | -2.221962000000 | -0.157079000000 | -0.879519000000 |
| C | -3.240863000000 | -0.129888000000 | 0.170406000000  |
| C | -4.089400000000 | -0.119689000000 | 1.031706000000  |
| H | 1.347095000000  | -2.634367000000 | -2.565908000000 |
| H | -0.007999000000 | -0.572680000000 | -2.341901000000 |
| H | -2.616366000000 | -2.571523000000 | 0.422656000000  |
| H | -1.261719000000 | -4.636295000000 | 0.209824000000  |
| H | 0.724940000000  | -4.679687000000 | -1.288633000000 |
| H | -2.717114000000 | 0.006574000000  | -1.846936000000 |
| H | -1.543360000000 | 0.693103000000  | -0.728915000000 |
| H | -4.842383000000 | -0.095281000000 | 1.790742000000  |
| H | 1.757073000000  | -2.692161000000 | 1.475027000000  |
| H | 2.745748000000  | -0.733012000000 | 0.260137000000  |
| F | -0.439243000000 | -2.594138000000 | 2.831965000000  |

-----  
**Pr3F7**

|   |                 |                 |                |
|---|-----------------|-----------------|----------------|
| C | -0.843285000000 | 0.031400000000  | 2.266105000000 |
| C | 0.113455000000  | 0.750973000000  | 1.569682000000 |
| C | 1.263263000000  | 0.174293000000  | 1.050464000000 |
| C | 1.455693000000  | -1.194474000000 | 1.240671000000 |
| C | 0.516463000000  | -1.953719000000 | 1.929891000000 |
| C | -0.637505000000 | -1.343231000000 | 2.443045000000 |
| C | -1.621840000000 | -2.130645000000 | 3.131598000000 |
| C | -2.453318000000 | -2.802764000000 | 3.698920000000 |
| H | -1.738412000000 | 0.520868000000  | 2.640888000000 |
| H | 2.343513000000  | -1.674146000000 | 0.833172000000 |

|   |                 |                 |                 |
|---|-----------------|-----------------|-----------------|
| H | 0.655624000000  | -3.023852000000 | 2.061664000000  |
| H | -3.182257000000 | -3.393860000000 | 4.211625000000  |
| C | 0.182512000000  | -2.569498000000 | -1.747898000000 |
| C | -0.593115000000 | -1.428626000000 | -1.555951000000 |
| C | -1.760998000000 | -1.480446000000 | -0.788908000000 |
| C | -2.140573000000 | -2.694094000000 | -0.214114000000 |
| C | -1.363586000000 | -3.837358000000 | -0.402249000000 |
| C | -0.201116000000 | -3.780104000000 | -1.169315000000 |
| C | -2.588071000000 | -0.214159000000 | -0.634381000000 |
| C | -3.586950000000 | -0.269252000000 | 0.434290000000  |
| C | -4.403237000000 | -0.338609000000 | 1.323344000000  |
| H | 1.090863000000  | -2.512869000000 | -2.346352000000 |
| H | -0.283928000000 | -0.481632000000 | -2.000172000000 |
| H | -3.035793000000 | -2.738775000000 | 0.403819000000  |
| H | -1.667493000000 | -4.775621000000 | 0.059867000000  |
| H | 0.404610000000  | -4.673289000000 | -1.315779000000 |
| H | -3.100188000000 | 0.000179000000  | -1.582935000000 |
| H | -1.915925000000 | 0.633411000000  | -0.444458000000 |
| H | -5.125332000000 | -0.390958000000 | 2.110460000000  |
| H | 1.979009000000  | 0.789728000000  | 0.510174000000  |
| F | -0.091968000000 | 2.072552000000  | 1.376261000000  |

-----  
**Pr3F8**

|   |                 |                 |                 |
|---|-----------------|-----------------|-----------------|
| C | 1.179620000000  | 0.631772000000  | 0.798459000000  |
| C | 1.798262000000  | -0.606408000000 | 0.787694000000  |
| C | 1.307467000000  | -1.700530000000 | 1.485631000000  |
| C | 0.136259000000  | -1.537407000000 | 2.222600000000  |
| C | -0.519566000000 | -0.309460000000 | 2.257055000000  |
| C | 0.001044000000  | 0.779524000000  | 1.544631000000  |
| C | -0.687478000000 | 2.040801000000  | 1.548986000000  |
| C | -1.290656000000 | 3.089953000000  | 1.530789000000  |
| H | 1.598388000000  | 1.460586000000  | 0.232951000000  |
| H | -0.277925000000 | -2.385743000000 | 2.763937000000  |
| H | -1.445107000000 | -0.186361000000 | 2.813031000000  |
| H | -1.818334000000 | 4.020159000000  | 1.529095000000  |
| C | 0.530266000000  | -2.564123000000 | -1.817304000000 |
| C | -0.249301000000 | -1.418139000000 | -1.677940000000 |
| C | -1.432814000000 | -1.443983000000 | -0.933814000000 |
| C | -1.827804000000 | -2.640549000000 | -0.333777000000 |
| C | -1.051164000000 | -3.791152000000 | -0.474286000000 |
| C | 0.130032000000  | -3.756903000000 | -1.213941000000 |
| C | -2.262530000000 | -0.174468000000 | -0.840001000000 |
| C | -3.263716000000 | -0.171691000000 | 0.227772000000  |
| C | -4.099558000000 | -0.179565000000 | 1.101470000000  |
| H | 1.455805000000  | -2.522929000000 | -2.389578000000 |
| H | 0.072189000000  | -0.485364000000 | -2.143029000000 |
| H | -2.743123000000 | -2.666160000000 | 0.255741000000  |
| H | -1.371041000000 | -4.718720000000 | -0.001153000000 |
| H | 0.737153000000  | -4.654673000000 | -1.320349000000 |
| H | -2.777757000000 | -0.012385000000 | -1.797495000000 |
| H | -1.595757000000 | 0.685317000000  | -0.694981000000 |
| H | -4.841059000000 | -0.169419000000 | 1.871999000000  |
| F | 2.916825000000  | -0.759048000000 | 0.048576000000  |
| H | 1.825776000000  | -2.654570000000 | 1.426299000000  |

-----  
**Pr3F9**

|   |                 |                |                |
|---|-----------------|----------------|----------------|
| C | -5.341657000000 | 1.528032000000 | 8.220382000000 |
| C | -5.978416000000 | 0.951797000000 | 9.305830000000 |
| C | -7.300956000000 | 1.216282000000 | 9.631050000000 |
| C | -8.011662000000 | 2.104994000000 | 8.824333000000 |
| C | -7.403883000000 | 2.710623000000 | 7.728530000000 |
| C | -6.064471000000 | 2.425529000000 | 7.425197000000 |

|   |                 |                |                 |
|---|-----------------|----------------|-----------------|
| C | -5.415249000000 | 3.082255000000 | 6.324941000000  |
| C | -4.868293000000 | 3.671377000000 | 5.419747000000  |
| H | -4.298501000000 | 1.302868000000 | 8.014637000000  |
| H | -7.953266000000 | 3.411568000000 | 7.104571000000  |
| H | -4.375153000000 | 4.201771000000 | 4.632091000000  |
| C | -3.709924000000 | 3.053367000000 | 10.877839000000 |
| C | -2.869656000000 | 3.345838000000 | 9.806708000000  |
| C | -3.250843000000 | 4.274113000000 | 8.831087000000  |
| C | -4.484327000000 | 4.913139000000 | 8.949767000000  |
| C | -5.331695000000 | 4.616343000000 | 10.018792000000 |
| C | -4.949032000000 | 3.687524000000 | 10.984200000000 |
| C | -2.321797000000 | 4.510238000000 | 7.652105000000  |
| C | -2.612729000000 | 5.711141000000 | 6.867072000000  |
| C | -2.854412000000 | 6.707094000000 | 6.225419000000  |
| H | -3.402215000000 | 2.324139000000 | 11.625597000000 |
| H | -1.903928000000 | 2.845247000000 | 9.724559000000  |
| H | -4.788664000000 | 5.633521000000 | 8.192074000000  |
| H | -6.298492000000 | 5.112143000000 | 10.093035000000 |
| H | -5.613114000000 | 3.454994000000 | 11.815269000000 |
| H | -2.374209000000 | 3.639131000000 | 6.982473000000  |
| H | -1.287117000000 | 4.570764000000 | 8.013926000000  |
| H | -3.057348000000 | 7.591466000000 | 5.659256000000  |
| H | -7.749926000000 | 0.735943000000 | 10.497472000000 |
| F | -5.276086000000 | 0.106885000000 | 10.088150000000 |
| H | -9.051123000000 | 2.328367000000 | 9.058009000000  |

-----  
**Pr3F10**

|   |                 |                 |                 |
|---|-----------------|-----------------|-----------------|
| C | 0.323931000000  | -1.097239000000 | 1.901025000000  |
| C | -0.725653000000 | -1.452038000000 | 2.742520000000  |
| C | -1.689380000000 | -0.515487000000 | 3.116792000000  |
| C | -1.566707000000 | 0.777252000000  | 2.628669000000  |
| C | -0.538078000000 | 1.170271000000  | 1.788481000000  |
| C | 0.417815000000  | 0.214823000000  | 1.416968000000  |
| C | 1.472145000000  | 0.577191000000  | 0.511342000000  |
| C | 2.347681000000  | 0.874966000000  | -0.269834000000 |
| H | 1.062143000000  | -1.833009000000 | 1.591900000000  |
| H | -0.806357000000 | -2.476355000000 | 3.100948000000  |
| H | -0.485745000000 | 2.193535000000  | 1.424496000000  |
| H | 3.131543000000  | 1.142621000000  | -0.946556000000 |
| C | -0.507228000000 | -1.608377000000 | -1.448382000000 |
| C | -1.534130000000 | -0.767898000000 | -1.025188000000 |
| C | -2.578301000000 | -1.256974000000 | -0.234493000000 |
| C | -2.582104000000 | -2.606172000000 | 0.122191000000  |
| C | -1.555904000000 | -3.451149000000 | -0.301773000000 |
| C | -0.515042000000 | -2.955614000000 | -1.085806000000 |
| C | -3.685586000000 | -0.302456000000 | 0.181500000000  |
| C | -4.550380000000 | -0.794649000000 | 1.255225000000  |
| C | -5.269118000000 | -1.210192000000 | 2.134252000000  |
| H | 0.307790000000  | -1.205583000000 | -2.047556000000 |
| H | -1.513381000000 | 0.288248000000  | -1.297557000000 |
| H | -3.387176000000 | -2.992824000000 | 0.745265000000  |
| H | -1.570024000000 | -4.502085000000 | -0.015640000000 |
| H | 0.287683000000  | -3.615049000000 | -1.412319000000 |
| H | -4.313098000000 | -0.077085000000 | -0.692304000000 |
| H | -3.240465000000 | 0.649721000000  | 0.498411000000  |
| H | -5.915150000000 | -1.562546000000 | 2.910347000000  |
| F | -2.500889000000 | 1.691024000000  | 2.967557000000  |
| H | -2.531585000000 | -0.771997000000 | 3.754344000000  |

-----  
**Pr3F11**

|   |                 |                 |                |
|---|-----------------|-----------------|----------------|
| C | -3.191817000000 | -0.825987000000 | 2.952064000000 |
| C | -2.756846000000 | 0.473631000000  | 3.197773000000 |



|   |                 |                 |                 |
|---|-----------------|-----------------|-----------------|
| C | -3.648652000000 | 1.544996000000  | 3.146711000000  |
| C | -4.977857000000 | 1.278906000000  | 2.841282000000  |
| C | -5.447162000000 | 0.002077000000  | 2.586574000000  |
| C | -4.538893000000 | -1.065515000000 | 2.646589000000  |
| C | -4.996503000000 | -2.402806000000 | 2.390209000000  |
| C | -5.383389000000 | -3.530673000000 | 2.183361000000  |
| H | -2.490215000000 | -1.657849000000 | 2.964736000000  |
| H | -1.707795000000 | 0.656087000000  | 3.423455000000  |
| H | -6.492171000000 | -0.160537000000 | 2.335987000000  |
| H | -5.725405000000 | -4.527821000000 | 2.003253000000  |
| C | -0.116706000000 | -1.288156000000 | 0.584368000000  |
| C | -1.143770000000 | -0.438803000000 | 0.184429000000  |
| C | -2.407977000000 | -0.946865000000 | -0.134936000000 |
| C | -2.621581000000 | -2.322016000000 | -0.069706000000 |
| C | -1.593033000000 | -3.176801000000 | 0.333684000000  |
| C | -0.341219000000 | -2.665041000000 | 0.666454000000  |
| C | -3.508662000000 | 0.039630000000  | -0.485347000000 |
| C | -4.809633000000 | -0.564635000000 | -0.772915000000 |
| C | -5.879157000000 | -1.081120000000 | -0.997894000000 |
| H | 0.861019000000  | -0.878393000000 | 0.834705000000  |
| H | -0.971349000000 | 0.637435000000  | 0.137390000000  |
| H | -3.604693000000 | -2.724053000000 | -0.306809000000 |
| H | -1.777247000000 | -4.248610000000 | 0.393477000000  |
| H | 0.458746000000  | -3.332148000000 | 0.983898000000  |
| H | -3.196849000000 | 0.642475000000  | -1.348816000000 |
| H | -3.627901000000 | 0.736653000000  | 0.357749000000  |
| H | -6.829514000000 | -1.528699000000 | -1.198011000000 |
| H | -3.334847000000 | 2.569197000000  | 3.335734000000  |
| F | -5.846437000000 | 2.309529000000  | 2.785742000000  |

---

**Pr3F12**

|   |                 |                |                 |
|---|-----------------|----------------|-----------------|
| C | -5.365255000000 | 1.492888000000 | 8.208524000000  |
| C | -5.991238000000 | 0.883054000000 | 9.291334000000  |
| C | -7.315632000000 | 1.181303000000 | 9.608971000000  |
| C | -7.987094000000 | 2.101564000000 | 8.816072000000  |
| C | -7.399735000000 | 2.728650000000 | 7.730649000000  |
| C | -6.066983000000 | 2.419086000000 | 7.425639000000  |
| C | -5.413939000000 | 3.081723000000 | 6.331255000000  |
| C | -4.863310000000 | 3.670642000000 | 5.428156000000  |
| H | -4.327169000000 | 1.272388000000 | 7.971567000000  |
| H | -5.439003000000 | 0.172777000000 | 9.903893000000  |
| H | -7.962487000000 | 3.447443000000 | 7.140336000000  |
| H | -4.365675000000 | 4.201668000000 | 4.643754000000  |
| C | -3.665075000000 | 3.097816000000 | 10.910621000000 |
| C | -2.834776000000 | 3.383794000000 | 9.829955000000  |
| C | -3.240785000000 | 4.279820000000 | 8.834784000000  |
| C | -4.488233000000 | 4.892918000000 | 8.944201000000  |
| C | -5.325969000000 | 4.600768000000 | 10.022072000000 |
| C | -4.919325000000 | 3.702991000000 | 11.006427000000 |
| C | -2.323203000000 | 4.511264000000 | 7.646179000000  |
| C | -2.620562000000 | 5.711252000000 | 6.861946000000  |
| C | -2.867243000000 | 6.706542000000 | 6.221202000000  |
| H | -3.333596000000 | 2.400857000000 | 11.679280000000 |
| H | -1.856279000000 | 2.907083000000 | 9.757820000000  |
| H | -4.810503000000 | 5.590503000000 | 8.172700000000  |
| H | -6.303161000000 | 5.076802000000 | 10.089438000000 |
| H | -5.575400000000 | 3.474950000000 | 11.845019000000 |
| H | -2.384352000000 | 3.638702000000 | 6.979195000000  |
| H | -1.285011000000 | 4.571417000000 | 7.997325000000  |
| H | -3.074992000000 | 7.590536000000 | 5.656147000000  |
| H | -7.827379000000 | 0.720726000000 | 10.451008000000 |
| F | -9.268318000000 | 2.401340000000 | 9.116463000000  |

-----  
**Pr3F13**

|   |                |                 |                 |
|---|----------------|-----------------|-----------------|
| C | 6.164710000000 | 1.697693000000  | 1.619966000000  |
| C | 6.298734000000 | 1.716295000000  | 0.233596000000  |
| C | 6.485396000000 | 2.918288000000  | -0.447821000000 |
| C | 6.529015000000 | 4.091776000000  | 0.295169000000  |
| C | 6.399697000000 | 4.114105000000  | 1.673535000000  |
| C | 6.218522000000 | 2.895716000000  | 2.345492000000  |
| C | 6.077451000000 | 2.884849000000  | 3.774133000000  |
| C | 5.952618000000 | 2.876246000000  | 4.977285000000  |
| H | 6.000804000000 | 0.761960000000  | 2.148758000000  |
| H | 6.239796000000 | 0.785012000000  | -0.325801000000 |
| H | 6.437545000000 | 5.055963000000  | 2.215218000000  |
| H | 5.831247000000 | 2.867860000000  | 6.039592000000  |
| C | 2.798983000000 | 4.608215000000  | 4.255300000000  |
| C | 2.945529000000 | 4.281781000000  | 2.911237000000  |
| C | 2.826418000000 | 2.954991000000  | 2.480509000000  |
| C | 2.568079000000 | 1.959275000000  | 3.420504000000  |
| C | 2.419337000000 | 2.285231000000  | 4.770700000000  |
| C | 2.529946000000 | 3.607438000000  | 5.191763000000  |
| C | 2.967110000000 | 2.669847000000  | 0.994783000000  |
| C | 2.933457000000 | 1.253303000000  | 0.629824000000  |
| C | 2.893970000000 | 0.080256000000  | 0.338469000000  |
| H | 2.894296000000 | 5.644913000000  | 4.575249000000  |
| H | 3.156912000000 | 5.064625000000  | 2.181328000000  |
| H | 2.480902000000 | 0.923970000000  | 3.095245000000  |
| H | 2.214573000000 | 1.497479000000  | 5.494550000000  |
| H | 2.411545000000 | 3.860677000000  | 6.244402000000  |
| H | 3.909479000000 | 3.104008000000  | 0.633619000000  |
| H | 2.160090000000 | 3.186001000000  | 0.456654000000  |
| H | 2.854374000000 | -0.953262000000 | 0.066408000000  |
| F | 6.701785000000 | 5.261778000000  | -0.354019000000 |
| H | 6.588804000000 | 2.960864000000  | -1.529547000000 |

-----  
**Pr3F14**

|   |                 |                 |                 |
|---|-----------------|-----------------|-----------------|
| C | -3.268730000000 | -0.695470000000 | 2.659891000000  |
| C | -3.217509000000 | 0.687818000000  | 2.617174000000  |
| C | -4.341540000000 | 1.491506000000  | 2.738829000000  |
| C | -5.578347000000 | 0.870878000000  | 2.910230000000  |
| C | -5.674621000000 | -0.516575000000 | 2.946810000000  |
| C | -4.520918000000 | -1.303756000000 | 2.817296000000  |
| C | -4.618819000000 | -2.736977000000 | 2.832337000000  |
| C | -4.707570000000 | -3.944109000000 | 2.839116000000  |
| H | -2.361346000000 | -1.286014000000 | 2.549731000000  |
| H | -6.638838000000 | -1.003775000000 | 3.072195000000  |
| H | -4.784806000000 | -5.010674000000 | 2.854753000000  |
| C | -0.078478000000 | -1.705995000000 | 0.663096000000  |
| C | -0.819844000000 | -0.638086000000 | 0.161051000000  |
| C | -2.134712000000 | -0.827166000000 | -0.272841000000 |
| C | -2.693910000000 | -2.104637000000 | -0.212039000000 |
| C | -1.953325000000 | -3.175121000000 | 0.288471000000  |
| C | -0.645559000000 | -2.979528000000 | 0.731269000000  |
| C | -2.920870000000 | 0.370598000000  | -0.778856000000 |
| C | -4.373482000000 | 0.216615000000  | -0.672573000000 |
| C | -5.569745000000 | 0.067508000000  | -0.583556000000 |
| H | 0.939849000000  | -1.541690000000 | 1.012183000000  |
| H | -0.383421000000 | 0.360452000000  | 0.136231000000  |
| H | -3.728075000000 | -2.254132000000 | -0.518780000000 |
| H | -2.409501000000 | -4.161750000000 | 0.350500000000  |
| H | -0.072056000000 | -3.812989000000 | 1.133690000000  |
| H | -2.660101000000 | 0.567016000000  | -1.828505000000 |
| H | -2.617947000000 | 1.258416000000  | -0.207961000000 |

|   |                 |                 |                 |
|---|-----------------|-----------------|-----------------|
| H | -6.628631000000 | -0.054753000000 | -0.498733000000 |
| H | -4.239099000000 | 2.573518000000  | 2.696755000000  |
| F | -2.016395000000 | 1.282509000000  | 2.438318000000  |
| H | -6.475304000000 | 1.479560000000  | 3.008643000000  |

-----  
**Pr3F15**

|   |                |                 |                 |
|---|----------------|-----------------|-----------------|
| C | 6.099327000000 | 1.664906000000  | 1.756753000000  |
| C | 6.234162000000 | 1.553121000000  | 0.382289000000  |
| C | 6.462501000000 | 2.646533000000  | -0.441975000000 |
| C | 6.568510000000 | 3.906356000000  | 0.149369000000  |
| C | 6.446637000000 | 4.057411000000  | 1.528503000000  |
| C | 6.212109000000 | 2.934880000000  | 2.337870000000  |
| C | 6.081713000000 | 3.081038000000  | 3.760131000000  |
| C | 5.969005000000 | 3.202931000000  | 4.958332000000  |
| H | 5.901949000000 | 0.783481000000  | 2.361629000000  |
| H | 6.529404000000 | 5.037865000000  | 1.991501000000  |
| H | 5.857142000000 | 3.310564000000  | 6.016207000000  |
| C | 2.661649000000 | 4.515312000000  | 4.411698000000  |
| C | 2.819278000000 | 4.315583000000  | 3.043996000000  |
| C | 2.817807000000 | 3.023863000000  | 2.504995000000  |
| C | 2.667416000000 | 1.934225000000  | 3.361289000000  |
| C | 2.511031000000 | 2.132294000000  | 4.734809000000  |
| C | 2.502436000000 | 3.420435000000  | 5.263572000000  |
| C | 2.972336000000 | 2.874244000000  | 1.001016000000  |
| C | 2.977317000000 | 1.495741000000  | 0.511150000000  |
| C | 2.987050000000 | 0.353866000000  | 0.114076000000  |
| H | 2.662497000000 | 5.526805000000  | 4.815687000000  |
| H | 2.944612000000 | 5.172649000000  | 2.380816000000  |
| H | 2.668599000000 | 0.925967000000  | 2.950202000000  |
| H | 2.391561000000 | 1.272189000000  | 5.392256000000  |
| H | 2.375016000000 | 3.573637000000  | 6.334368000000  |
| H | 3.907794000000 | 3.359292000000  | 0.688344000000  |
| H | 2.157597000000 | 3.419379000000  | 0.505212000000  |
| H | 3.012383000000 | -0.649769000000 | -0.254372000000 |
| H | 6.552485000000 | 2.501907000000  | -1.516012000000 |
| H | 6.749378000000 | 4.778477000000  | -0.476255000000 |
| F | 6.141620000000 | 0.332004000000  | -0.175346000000 |

-----  
**Pr3F16**

|   |                 |                 |                 |
|---|-----------------|-----------------|-----------------|
| C | 0.888654000000  | 0.465015000000  | 2.083703000000  |
| C | -0.144707000000 | -0.423356000000 | 2.370236000000  |
| C | -1.401757000000 | 0.047065000000  | 2.745501000000  |
| C | -1.593423000000 | 1.419921000000  | 2.828183000000  |
| C | -0.592974000000 | 2.335247000000  | 2.545491000000  |
| C | 0.667304000000  | 1.847971000000  | 2.167662000000  |
| C | 1.726263000000  | 2.770090000000  | 1.861663000000  |
| C | 2.617229000000  | 3.545320000000  | 1.597763000000  |
| H | 0.020063000000  | -1.495512000000 | 2.272062000000  |
| H | -0.788984000000 | 3.402145000000  | 2.614965000000  |
| H | 3.405922000000  | 4.231050000000  | 1.369682000000  |
| C | 0.524101000000  | -2.653439000000 | -0.822531000000 |
| C | 0.096451000000  | -1.334301000000 | -0.941543000000 |
| C | -1.205597000000 | -0.969367000000 | -0.582048000000 |
| C | -2.079289000000 | -1.951339000000 | -0.118557000000 |
| C | -1.653046000000 | -3.276255000000 | 0.002356000000  |
| C | -0.351155000000 | -3.631309000000 | -0.343658000000 |
| C | -1.589952000000 | 0.496684000000  | -0.676032000000 |
| C | -2.935880000000 | 0.815218000000  | -0.199179000000 |
| C | -4.048380000000 | 1.067992000000  | 0.200686000000  |
| H | 1.542266000000  | -2.921360000000 | -1.101726000000 |
| H | 0.786853000000  | -0.569679000000 | -1.300288000000 |
| H | -3.094286000000 | -1.674799000000 | 0.162773000000  |

|   |                 |                 |                 |
|---|-----------------|-----------------|-----------------|
| H | -2.344646000000 | -4.033608000000 | 0.369073000000  |
| H | -0.019057000000 | -4.663769000000 | -0.246402000000 |
| H | -1.493211000000 | 0.831122000000  | -1.717752000000 |
| H | -0.866066000000 | 1.082378000000  | -0.089998000000 |
| H | -5.024390000000 | 1.314187000000  | 0.562165000000  |
| H | -2.230778000000 | -0.625532000000 | 2.953452000000  |
| F | -2.802691000000 | 1.883587000000  | 3.195659000000  |
| H | 1.867431000000  | 0.098601000000  | 1.783095000000  |

-----  
**Pr3F17**

|   |                |                 |                 |
|---|----------------|-----------------|-----------------|
| C | 5.985300000000 | 2.427521000000  | -0.629566000000 |
| C | 6.089437000000 | 3.683414000000  | -0.053277000000 |
| C | 5.936857000000 | 3.902830000000  | 1.309029000000  |
| C | 5.664378000000 | 2.805789000000  | 2.126510000000  |
| C | 5.552294000000 | 1.528719000000  | 1.585068000000  |
| C | 5.715764000000 | 1.333840000000  | 0.205407000000  |
| C | 5.614259000000 | 0.016156000000  | -0.357581000000 |
| C | 5.547352000000 | -1.094327000000 | -0.833720000000 |
| H | 6.111972000000 | 2.302493000000  | -1.701949000000 |
| H | 5.509257000000 | 2.956987000000  | 3.194034000000  |
| H | 5.489631000000 | -2.075376000000 | -1.255791000000 |
| C | 2.902350000000 | 4.788422000000  | 4.086251000000  |
| C | 2.705947000000 | 4.417881000000  | 2.759094000000  |
| C | 2.524179000000 | 3.075063000000  | 2.410873000000  |
| C | 2.520768000000 | 2.110278000000  | 3.416701000000  |
| C | 2.717032000000 | 2.478897000000  | 4.749802000000  |
| C | 2.914033000000 | 3.815610000000  | 5.088897000000  |
| C | 2.386925000000 | 2.728335000000  | 0.938957000000  |
| C | 2.271907000000 | 1.299143000000  | 0.649110000000  |
| C | 2.196620000000 | 0.115586000000  | 0.415375000000  |
| H | 3.047893000000 | 5.837266000000  | 4.341465000000  |
| H | 2.712497000000 | 5.177789000000  | 1.976454000000  |
| H | 2.379922000000 | 1.063272000000  | 3.152827000000  |
| H | 2.716280000000 | 1.714800000000  | 5.526003000000  |
| H | 3.070305000000 | 4.101580000000  | 6.127876000000  |
| H | 3.268509000000 | 3.118287000000  | 0.408483000000  |
| H | 1.514084000000 | 3.249112000000  | 0.522709000000  |
| H | 2.141012000000 | -0.927656000000 | 0.187631000000  |
| H | 6.020513000000 | 4.911588000000  | 1.707302000000  |
| H | 5.321783000000 | 0.675771000000  | 2.218892000000  |
| F | 6.347156000000 | 4.738338000000  | -0.854453000000 |

-----  
**Pr3F18**

|   |                 |                 |                 |
|---|-----------------|-----------------|-----------------|
| C | 0.203822000000  | -0.384128000000 | 1.883258000000  |
| C | 1.583941000000  | -0.558425000000 | 1.831483000000  |
| C | 2.443677000000  | 0.538954000000  | 1.861367000000  |
| C | 1.884319000000  | 1.807271000000  | 1.941218000000  |
| C | 0.517955000000  | 2.022849000000  | 1.993732000000  |
| C | -0.333580000000 | 0.908058000000  | 1.965414000000  |
| C | -1.757576000000 | 1.097377000000  | 2.003826000000  |
| C | -2.957299000000 | 1.257995000000  | 2.005931000000  |
| H | -0.464997000000 | -1.241169000000 | 1.843145000000  |
| H | 0.123839000000  | 3.034169000000  | 2.057400000000  |
| H | -4.018087000000 | 1.393421000000  | 1.989423000000  |
| C | 0.007368000000  | -2.642935000000 | -0.797490000000 |
| C | -0.495390000000 | -1.421540000000 | -1.239441000000 |
| C | -1.768198000000 | -0.990576000000 | -0.852344000000 |
| C | -2.533519000000 | -1.805064000000 | -0.016720000000 |
| C | -2.031330000000 | -3.028647000000 | 0.429728000000  |
| C | -0.759999000000 | -3.451485000000 | 0.042592000000  |
| C | -2.250569000000 | 0.370121000000  | -1.324643000000 |
| C | -3.692439000000 | 0.587407000000  | -1.196949000000 |

|   |                 |                 |                 |
|---|-----------------|-----------------|-----------------|
| C | -4.886486000000 | 0.752331000000  | -1.101374000000 |
| H | 1.000210000000  | -2.964356000000 | -1.109156000000 |
| H | 0.111563000000  | -0.789491000000 | -1.888538000000 |
| H | -3.525741000000 | -1.476351000000 | 0.287357000000  |
| H | -2.639190000000 | -3.655183000000 | 1.080740000000  |
| H | -0.371891000000 | -4.408716000000 | 0.387385000000  |
| H | -1.969381000000 | 0.506061000000  | -2.376735000000 |
| H | -1.728335000000 | 1.149523000000  | -0.751047000000 |
| H | -5.942252000000 | 0.908921000000  | -1.032667000000 |
| H | 3.525315000000  | 0.429387000000  | 1.823031000000  |
| F | 2.706613000000  | 2.876877000000  | 1.968467000000  |
| H | 1.995236000000  | -1.563928000000 | 1.761030000000  |

-----  
**Pr3F19**

|   |                 |                 |                 |
|---|-----------------|-----------------|-----------------|
| C | 3.121740000000  | 0.654839000000  | 2.991452000000  |
| C | 4.391024000000  | 0.091518000000  | 2.899479000000  |
| C | 4.777724000000  | -0.607309000000 | 1.755618000000  |
| C | 3.863756000000  | -0.720722000000 | 0.717396000000  |
| C | 2.593261000000  | -0.173180000000 | 0.769718000000  |
| C | 2.218076000000  | 0.523172000000  | 1.926379000000  |
| C | 0.900964000000  | 1.090323000000  | 2.020102000000  |
| C | -0.209959000000 | 1.563223000000  | 2.111357000000  |
| H | 2.818626000000  | 1.198285000000  | 3.883310000000  |
| H | 5.090483000000  | 0.195571000000  | 3.727114000000  |
| H | 1.906724000000  | -0.299984000000 | -0.064139000000 |
| H | -1.206612000000 | 1.947662000000  | 2.182103000000  |
| C | 1.001354000000  | -2.464022000000 | -1.543718000000 |
| C | 0.054111000000  | -1.443705000000 | -1.611181000000 |
| C | -0.695167000000 | -1.089213000000 | -0.483796000000 |
| C | -0.489696000000 | -1.779671000000 | 0.711365000000  |
| C | 0.459372000000  | -2.800506000000 | 0.780519000000  |
| C | 1.208683000000  | -3.144517000000 | -0.343350000000 |
| C | -1.666468000000 | 0.074044000000  | -0.589748000000 |
| C | -2.694887000000 | 0.112410000000  | 0.451699000000  |
| C | -3.543555000000 | 0.139033000000  | 1.312723000000  |
| H | 1.582760000000  | -2.723862000000 | -2.426747000000 |
| H | -0.103456000000 | -0.912834000000 | -2.550635000000 |
| H | -1.067605000000 | -1.508073000000 | 1.592961000000  |
| H | 0.617264000000  | -3.324750000000 | 1.721721000000  |
| H | 1.955643000000  | -3.934237000000 | -0.285244000000 |
| H | -2.160807000000 | 0.044964000000  | -1.569009000000 |
| H | -1.095589000000 | 1.013430000000  | -0.548506000000 |
| H | -4.303122000000 | 0.160937000000  | 2.065510000000  |
| H | 5.763155000000  | -1.057572000000 | 1.659196000000  |
| F | 4.228077000000  | -1.397195000000 | -0.392047000000 |

-----  
**Pr3F20**

|   |                 |                 |                 |
|---|-----------------|-----------------|-----------------|
| C | 2.165053000000  | 0.158599000000  | 0.910622000000  |
| C | 1.346053000000  | 1.282500000000  | 0.863540000000  |
| C | 0.043884000000  | 1.233350000000  | 1.361898000000  |
| C | -0.407218000000 | 0.036471000000  | 1.901234000000  |
| C | 0.380539000000  | -1.099689000000 | 1.974639000000  |
| C | 1.683954000000  | -1.035985000000 | 1.467410000000  |
| C | 2.519486000000  | -2.204287000000 | 1.499450000000  |
| C | 3.223833000000  | -3.188425000000 | 1.514563000000  |
| H | 3.178672000000  | 0.192541000000  | 0.518272000000  |
| H | 1.723489000000  | 2.209640000000  | 0.436085000000  |
| H | -0.020864000000 | -2.020369000000 | 2.389495000000  |
| H | 3.849704000000  | -4.055477000000 | 1.538502000000  |
| C | 0.335960000000  | -2.052400000000 | -1.393608000000 |
| C | -0.613568000000 | -1.036359000000 | -1.356231000000 |
| C | -1.834551000000 | -1.222825000000 | -0.697026000000 |

|   |                 |                 |                 |
|---|-----------------|-----------------|-----------------|
| C | -2.090561000000 | -2.445291000000 | -0.078859000000 |
| C | -1.137971000000 | -3.467182000000 | -0.116668000000 |
| C | 0.075887000000  | -3.275349000000 | -0.770926000000 |
| C | -2.815830000000 | -0.064016000000 | -0.662327000000 |
| C | -4.098156000000 | -0.354593000000 | -0.020787000000 |
| C | -5.155282000000 | -0.604360000000 | 0.509110000000  |
| H | 1.287427000000  | -1.888479000000 | -1.897700000000 |
| H | -0.401819000000 | -0.078078000000 | -1.832609000000 |
| H | -3.036267000000 | -2.595546000000 | 0.439016000000  |
| H | -1.349606000000 | -4.417896000000 | 0.370937000000  |
| H | 0.822897000000  | -4.066856000000 | -0.787945000000 |
| H | -3.004686000000 | 0.276254000000  | -1.689334000000 |
| H | -2.344996000000 | 0.779127000000  | -0.136730000000 |
| H | -6.093826000000 | -0.812374000000 | 0.977660000000  |
| H | -0.616103000000 | 2.098187000000  | 1.339951000000  |
| F | -1.674052000000 | -0.026446000000 | 2.356840000000  |

-----

**Pr3F21**

|   |                 |                 |                 |
|---|-----------------|-----------------|-----------------|
| C | -0.781663000000 | -0.606425000000 | 2.074661000000  |
| C | -0.272684000000 | 0.316846000000  | 1.178196000000  |
| C | 1.019020000000  | 0.246404000000  | 0.675657000000  |
| C | 1.831460000000  | -0.807292000000 | 1.092298000000  |
| C | 1.355699000000  | -1.756790000000 | 1.991250000000  |
| C | 0.047362000000  | -1.658807000000 | 2.487048000000  |
| C | -0.454168000000 | -2.633676000000 | 3.415050000000  |
| C | -0.892576000000 | -3.462612000000 | 4.180056000000  |
| H | -1.800960000000 | -0.517834000000 | 2.442132000000  |
| H | 1.989792000000  | -2.577304000000 | 2.319382000000  |
| H | -1.292071000000 | -4.189660000000 | 4.854994000000  |
| C | -4.008168000000 | -4.935825000000 | 2.546209000000  |
| C | -2.828006000000 | -5.066096000000 | 1.820865000000  |
| C | -2.359119000000 | -4.015874000000 | 1.024378000000  |
| C | -3.101582000000 | -2.839072000000 | 0.950696000000  |
| C | -4.284382000000 | -2.703709000000 | 1.681579000000  |
| C | -4.738808000000 | -3.746852000000 | 2.484098000000  |
| C | -1.030947000000 | -4.191944000000 | 0.309281000000  |
| C | -0.680312000000 | -3.111341000000 | -0.612824000000 |
| C | -0.407052000000 | -2.212447000000 | -1.373555000000 |
| H | -4.361429000000 | -5.762195000000 | 3.161901000000  |
| H | -2.253430000000 | -5.991466000000 | 1.880814000000  |
| H | -2.748993000000 | -2.022659000000 | 0.322112000000  |
| H | -4.854092000000 | -1.777362000000 | 1.618082000000  |
| H | -5.661325000000 | -3.640643000000 | 3.052831000000  |
| H | -1.040916000000 | -5.140432000000 | -0.243759000000 |
| H | -0.238878000000 | -4.277930000000 | 1.068158000000  |
| H | -0.156126000000 | -1.422139000000 | -2.048662000000 |
| H | 1.366430000000  | 1.001921000000  | -0.025686000000 |
| F | -1.069756000000 | 1.327313000000  | 0.772704000000  |
| H | 2.846709000000  | -0.887172000000 | 0.708252000000  |

-----

**Pr3F22**

|   |                 |                 |                |
|---|-----------------|-----------------|----------------|
| C | 3.167676000000  | 0.736967000000  | 2.984321000000 |
| C | 4.439015000000  | 0.207021000000  | 2.845343000000 |
| C | 4.831536000000  | -0.527752000000 | 1.734737000000 |
| C | 3.897582000000  | -0.735057000000 | 0.720106000000 |
| C | 2.609820000000  | -0.216837000000 | 0.821195000000 |
| C | 2.240186000000  | 0.520153000000  | 1.954949000000 |
| C | 0.908863000000  | 1.048708000000  | 2.070913000000 |
| C | -0.213162000000 | 1.491350000000  | 2.177282000000 |
| H | 2.904246000000  | 1.304995000000  | 3.873095000000 |
| H | 1.881820000000  | -0.388831000000 | 0.032061000000 |
| H | -1.218503000000 | 1.850175000000  | 2.259361000000 |

|   |                 |                 |                 |
|---|-----------------|-----------------|-----------------|
| C | 0.953257000000  | -2.507681000000 | -1.557655000000 |
| C | 0.041375000000  | -1.454291000000 | -1.615768000000 |
| C | -0.704129000000 | -1.093008000000 | -0.488888000000 |
| C | -0.528679000000 | -1.807003000000 | 0.697872000000  |
| C | 0.385918000000  | -2.858529000000 | 0.758770000000  |
| C | 1.129420000000  | -3.212392000000 | -0.366306000000 |
| C | -1.636649000000 | 0.102342000000  | -0.581552000000 |
| C | -2.690022000000 | 0.137455000000  | 0.434901000000  |
| C | -3.559173000000 | 0.161094000000  | 1.275303000000  |
| H | 1.522692000000  | -2.780328000000 | -2.445054000000 |
| H | -0.093385000000 | -0.906007000000 | -2.548662000000 |
| H | -1.104135000000 | -1.529935000000 | 1.579369000000  |
| H | 0.519965000000  | -3.401698000000 | 1.692791000000  |
| H | 1.842340000000  | -4.033783000000 | -0.315825000000 |
| H | -2.106021000000 | 0.119857000000  | -1.573213000000 |
| H | -1.038717000000 | 1.021478000000  | -0.494079000000 |
| H | -4.337280000000 | 0.180821000000  | 2.009006000000  |
| H | 5.844293000000  | -0.921103000000 | 1.680342000000  |
| F | 5.334151000000  | 0.413676000000  | 3.833831000000  |
| H | 4.176556000000  | -1.311781000000 | -0.160182000000 |

-----  
**Pr3F23**

|   |                 |                 |                 |
|---|-----------------|-----------------|-----------------|
| C | -0.777534000000 | -0.584613000000 | 2.097073000000  |
| C | -0.304271000000 | 0.368137000000  | 1.200427000000  |
| C | 0.983587000000  | 0.271874000000  | 0.673972000000  |
| C | 1.774583000000  | -0.798133000000 | 1.067190000000  |
| C | 1.341784000000  | -1.763055000000 | 1.960286000000  |
| C | 0.045539000000  | -1.653189000000 | 2.482114000000  |
| C | -0.441053000000 | -2.636929000000 | 3.408724000000  |
| C | -0.868816000000 | -3.473565000000 | 4.171403000000  |
| H | -1.782941000000 | -0.517849000000 | 2.506005000000  |
| H | -0.943806000000 | 1.198016000000  | 0.905199000000  |
| H | 1.998765000000  | -2.581845000000 | 2.243465000000  |
| H | -1.259150000000 | -4.206062000000 | 4.845823000000  |
| C | -4.024586000000 | -4.930641000000 | 2.536944000000  |
| C | -2.839861000000 | -5.070998000000 | 1.820959000000  |
| C | -2.355065000000 | -4.024445000000 | 1.029159000000  |
| C | -3.085617000000 | -2.840545000000 | 0.951223000000  |
| C | -4.273235000000 | -2.695388000000 | 1.672217000000  |
| C | -4.744032000000 | -3.735148000000 | 2.469707000000  |
| C | -1.023076000000 | -4.211640000000 | 0.324618000000  |
| C | -0.655378000000 | -3.136663000000 | -0.597315000000 |
| C | -0.361313000000 | -2.243890000000 | -1.357483000000 |
| H | -4.390275000000 | -5.754227000000 | 3.149079000000  |
| H | -2.274446000000 | -6.001759000000 | 1.884372000000  |
| H | -2.717785000000 | -2.026506000000 | 0.328410000000  |
| H | -4.834294000000 | -1.763912000000 | 1.605664000000  |
| H | -5.670294000000 | -3.621148000000 | 3.030805000000  |
| H | -1.035092000000 | -5.161531000000 | -0.225895000000 |
| H | -0.237712000000 | -4.301777000000 | 1.090097000000  |
| H | -0.086161000000 | -1.462244000000 | -2.033189000000 |
| H | 1.377830000000  | 1.003087000000  | -0.028400000000 |
| F | 3.018773000000  | -0.903939000000 | 0.558383000000  |

-----  
**PrBz-4FPHA Hetero-Dimer**

**Pr4F1**

|   |                |                |                |
|---|----------------|----------------|----------------|
| C | 6.440660000000 | 0.746940000000 | 3.529719000000 |
| C | 5.739863000000 | 0.001798000000 | 4.472883000000 |
| C | 5.260935000000 | 0.650113000000 | 5.600884000000 |

|   |                |                 |                |
|---|----------------|-----------------|----------------|
| C | 5.450402000000 | 2.007458000000  | 5.824781000000 |
| C | 6.144739000000 | 2.743532000000  | 4.873600000000 |
| C | 6.645022000000 | 2.120283000000  | 3.720029000000 |
| C | 7.323936000000 | 2.894986000000  | 2.719862000000 |
| C | 7.863262000000 | 3.555885000000  | 1.859787000000 |
| H | 6.814233000000 | 0.267268000000  | 2.627173000000 |
| H | 5.551378000000 | -1.060289000000 | 4.335941000000 |
| H | 5.039227000000 | 2.470278000000  | 6.718832000000 |
| H | 6.288985000000 | 3.813244000000  | 5.007365000000 |
| H | 8.366855000000 | 4.133566000000  | 1.113839000000 |
| F | 4.567000000000 | -0.062359000000 | 6.511885000000 |
| C | 3.464742000000 | 4.704611000000  | 3.506246000000 |
| C | 3.966057000000 | 3.954586000000  | 2.446897000000 |
| C | 3.700691000000 | 2.582735000000  | 2.355530000000 |
| C | 2.926994000000 | 1.975131000000  | 3.342532000000 |
| C | 2.420516000000 | 2.727425000000  | 4.405292000000 |
| C | 2.686294000000 | 4.091335000000  | 4.491215000000 |
| C | 4.271710000000 | 1.821599000000  | 1.171050000000 |
| C | 4.045386000000 | 0.375846000000  | 1.194212000000 |
| C | 3.850050000000 | -0.817297000000 | 1.215830000000 |
| H | 3.680110000000 | 5.770702000000  | 3.564904000000 |
| H | 4.583422000000 | 4.432514000000  | 1.685521000000 |
| H | 2.724379000000 | 0.906906000000  | 3.283919000000 |
| H | 1.819729000000 | 2.238603000000  | 5.171264000000 |
| H | 2.290859000000 | 4.677013000000  | 5.319880000000 |
| H | 5.352569000000 | 2.013935000000  | 1.115523000000 |
| H | 3.839117000000 | 2.226201000000  | 0.245663000000 |
| H | 3.676361000000 | -1.872632000000 | 1.219074000000 |

---

**Pr4F2**

|   |                |                 |                |
|---|----------------|-----------------|----------------|
| C | 7.225529000000 | 3.021563000000  | 4.688763000000 |
| C | 6.543296000000 | 3.194219000000  | 5.887815000000 |
| C | 5.446521000000 | 2.382519000000  | 6.146863000000 |
| C | 5.012846000000 | 1.405161000000  | 5.264062000000 |
| C | 5.701889000000 | 1.240993000000  | 4.067161000000 |
| C | 6.809844000000 | 2.047820000000  | 3.767655000000 |
| C | 7.502157000000 | 1.888189000000  | 2.519123000000 |
| C | 8.065534000000 | 1.766785000000  | 1.454305000000 |
| H | 8.087053000000 | 3.643502000000  | 4.454842000000 |
| H | 6.842050000000 | 3.946125000000  | 6.614825000000 |
| H | 4.137172000000 | 0.807938000000  | 5.506603000000 |
| H | 5.369934000000 | 0.501974000000  | 3.340444000000 |
| H | 8.565732000000 | 1.645280000000  | 0.516931000000 |
| F | 4.771393000000 | 2.561837000000  | 7.299287000000 |
| C | 3.384391000000 | 4.545727000000  | 4.704243000000 |
| C | 4.027263000000 | 4.271090000000  | 3.499190000000 |
| C | 3.578289000000 | 3.238592000000  | 2.672023000000 |
| C | 2.468056000000 | 2.488927000000  | 3.064417000000 |
| C | 1.821609000000 | 2.763961000000  | 4.269805000000 |
| C | 2.278958000000 | 3.790217000000  | 5.095605000000 |
| C | 4.305389000000 | 2.971719000000  | 1.365119000000 |
| C | 4.213346000000 | 1.586754000000  | 0.896756000000 |
| C | 4.130380000000 | 0.442005000000  | 0.515977000000 |
| H | 3.757069000000 | 5.341496000000  | 5.347936000000 |
| H | 4.905232000000 | 4.848996000000  | 3.208710000000 |
| H | 2.121229000000 | 1.673358000000  | 2.430989000000 |
| H | 0.959253000000 | 2.168873000000  | 4.567624000000 |
| H | 1.783688000000 | 3.994284000000  | 6.043357000000 |
| H | 5.366526000000 | 3.226188000000  | 1.482645000000 |
| H | 3.905080000000 | 3.631965000000  | 0.582453000000 |
| H | 4.067232000000 | -0.567014000000 | 0.167231000000 |

---



**Pr4F3**

|   |                 |                 |                 |
|---|-----------------|-----------------|-----------------|
| C | 0.399392000000  | -1.082441000000 | 1.784334000000  |
| C | -0.472835000000 | -1.614492000000 | 2.726557000000  |
| C | -1.446000000000 | -0.788081000000 | 3.271274000000  |
| C | -1.577753000000 | 0.547131000000  | 2.915521000000  |
| C | -0.698392000000 | 1.069816000000  | 1.972547000000  |
| C | 0.292165000000  | 0.260955000000  | 1.396590000000  |
| C | 1.170731000000  | 0.795480000000  | 0.394434000000  |
| C | 1.896686000000  | 1.240143000000  | -0.466801000000 |
| H | 1.158641000000  | -1.711453000000 | 1.325298000000  |
| H | -0.418311000000 | -2.657177000000 | 3.030693000000  |
| H | -2.364202000000 | 1.148546000000  | 3.365256000000  |
| H | -0.776339000000 | 2.112725000000  | 1.671233000000  |
| H | 2.551126000000  | 1.639037000000  | -1.212642000000 |
| F | -2.294628000000 | -1.302451000000 | 4.182031000000  |
| C | -0.499772000000 | -1.805647000000 | -1.504468000000 |
| C | -1.451880000000 | -0.860880000000 | -1.130084000000 |
| C | -2.502765000000 | -1.205689000000 | -0.275132000000 |
| C | -2.588594000000 | -2.515227000000 | 0.199444000000  |
| C | -1.639517000000 | -3.465844000000 | -0.178862000000 |
| C | -0.592691000000 | -3.114865000000 | -1.029883000000 |
| C | -3.532113000000 | -0.145856000000 | 0.081521000000  |
| C | -4.317857000000 | -0.441847000000 | 1.280833000000  |
| C | -4.953779000000 | -0.702594000000 | 2.275449000000  |
| H | 0.322858000000  | -1.513772000000 | -2.155590000000 |
| H | -1.360921000000 | 0.165742000000  | -1.487419000000 |
| H | -3.394484000000 | -2.786944000000 | 0.879768000000  |
| H | -1.717443000000 | -4.484854000000 | 0.197979000000  |
| H | 0.150089000000  | -3.856510000000 | -1.320221000000 |
| H | -4.219571000000 | -0.009320000000 | -0.765220000000 |
| H | -3.017606000000 | 0.812877000000  | 0.226427000000  |
| H | -5.510864000000 | -0.928102000000 | 3.160206000000  |

**Pr4F4**

|   |                 |                 |                 |
|---|-----------------|-----------------|-----------------|
| C | -0.840586000000 | -0.000354000000 | 2.391143000000  |
| C | 0.117338000000  | 0.748760000000  | 1.712659000000  |
| C | 1.210568000000  | 0.088545000000  | 1.170954000000  |
| C | 1.393672000000  | -1.282359000000 | 1.290460000000  |
| C | 0.432162000000  | -2.019930000000 | 1.969421000000  |
| C | -0.694360000000 | -1.388222000000 | 2.518709000000  |
| C | -1.701100000000 | -2.167000000000 | 3.182952000000  |
| C | -2.553358000000 | -2.833749000000 | 3.726144000000  |
| H | -1.718800000000 | 0.483781000000  | 2.811501000000  |
| H | 0.026428000000  | 1.826904000000  | 1.598923000000  |
| H | 2.264273000000  | -1.753246000000 | 0.840105000000  |
| H | 0.536087000000  | -3.098607000000 | 2.061732000000  |
| H | -3.299174000000 | -3.419789000000 | 4.219723000000  |
| F | 2.130620000000  | 0.807381000000  | 0.494280000000  |
| C | 0.266225000000  | -2.474838000000 | -1.782758000000 |
| C | -0.512142000000 | -1.340481000000 | -1.564429000000 |
| C | -1.685374000000 | -1.415090000000 | -0.807175000000 |
| C | -2.067468000000 | -2.644014000000 | -0.267742000000 |
| C | -1.288053000000 | -3.780882000000 | -0.482994000000 |
| C | -0.120401000000 | -3.701251000000 | -1.240584000000 |
| C | -2.515869000000 | -0.154858000000 | -0.626307000000 |
| C | -3.519557000000 | -0.235675000000 | 0.436081000000  |
| C | -4.339740000000 | -0.326711000000 | 1.319565000000  |
| H | 1.179058000000  | -2.399882000000 | -2.372174000000 |
| H | -0.199169000000 | -0.381321000000 | -1.979284000000 |
| H | -2.965994000000 | -2.706209000000 | 0.344168000000  |
| H | -1.594231000000 | -4.732107000000 | -0.049709000000 |
| H | 0.486902000000  | -4.589695000000 | -1.408076000000 |

|   |                 |                 |                 |
|---|-----------------|-----------------|-----------------|
| H | -3.022996000000 | 0.081664000000  | -1.572252000000 |
| H | -1.843177000000 | 0.685821000000  | -0.411902000000 |
| H | -5.063441000000 | -0.402866000000 | 2.103221000000  |

-----  
**Pr4F5**

|   |                |                 |                 |
|---|----------------|-----------------|-----------------|
| C | 7.395208000000 | 3.804629000000  | 3.368095000000  |
| C | 7.118144000000 | 3.792910000000  | 2.005184000000  |
| C | 6.384984000000 | 2.732218000000  | 1.489915000000  |
| C | 5.922518000000 | 1.687336000000  | 2.276717000000  |
| C | 6.204286000000 | 1.711766000000  | 3.638827000000  |
| C | 6.939192000000 | 2.767764000000  | 4.195431000000  |
| C | 7.202770000000 | 2.802210000000  | 5.606772000000  |
| C | 7.416108000000 | 2.840207000000  | 6.797932000000  |
| H | 7.964220000000 | 4.623382000000  | 3.803531000000  |
| H | 7.460069000000 | 4.585724000000  | 1.343580000000  |
| H | 5.331563000000 | 0.893240000000  | 1.825295000000  |
| H | 5.836093000000 | 0.919350000000  | 4.286546000000  |
| H | 7.614586000000 | 2.866264000000  | 7.848452000000  |
| F | 6.100753000000 | 2.726733000000  | 0.170519000000  |
| C | 4.085404000000 | 4.297369000000  | 4.979868000000  |
| C | 3.846220000000 | 4.304031000000  | 3.607882000000  |
| C | 3.163446000000 | 3.247594000000  | 2.998797000000  |
| C | 2.709900000000 | 2.189064000000  | 3.786709000000  |
| C | 2.946084000000 | 2.182371000000  | 5.162218000000  |
| C | 3.638268000000 | 3.232593000000  | 5.762600000000  |
| C | 2.933109000000 | 3.290567000000  | 1.497343000000  |
| C | 2.704379000000 | 1.980894000000  | 0.882659000000  |
| C | 2.514484000000 | 0.895989000000  | 0.383785000000  |
| H | 4.643302000000 | 5.113191000000  | 5.437634000000  |
| H | 4.217893000000 | 5.127407000000  | 2.996839000000  |
| H | 2.187513000000 | 1.356555000000  | 3.317482000000  |
| H | 2.593160000000 | 1.346977000000  | 5.765594000000  |
| H | 3.842788000000 | 3.216865000000  | 6.831662000000  |
| H | 3.802234000000 | 3.754767000000  | 1.013204000000  |
| H | 2.070040000000 | 3.934980000000  | 1.277420000000  |
| H | 2.343241000000 | -0.055585000000 | -0.073472000000 |

-----  
**Pr4F6**

|   |                 |                |                 |
|---|-----------------|----------------|-----------------|
| C | -5.341022000000 | 1.532292000000 | 8.181416000000  |
| C | -5.961543000000 | 0.897987000000 | 9.251654000000  |
| C | -7.282298000000 | 1.215691000000 | 9.532553000000  |
| C | -8.006551000000 | 2.134128000000 | 8.785383000000  |
| C | -7.375830000000 | 2.760936000000 | 7.715761000000  |
| C | -6.039613000000 | 2.468461000000 | 7.406785000000  |
| C | -5.378353000000 | 3.153414000000 | 6.331966000000  |
| C | -4.820835000000 | 3.762798000000 | 5.446437000000  |
| H | -4.299981000000 | 1.317797000000 | 7.949530000000  |
| H | -5.434953000000 | 0.178300000000 | 9.874246000000  |
| H | -9.040870000000 | 2.346939000000 | 9.046246000000  |
| H | -7.914173000000 | 3.490952000000 | 7.114962000000  |
| H | -4.317587000000 | 4.311247000000 | 4.677967000000  |
| F | -7.885839000000 | 0.611677000000 | 10.576970000000 |
| C | -3.677737000000 | 3.062491000000 | 10.940830000000 |
| C | -2.833722000000 | 3.361889000000 | 9.874417000000  |
| C | -3.221813000000 | 4.279702000000 | 8.891776000000  |
| C | -4.465535000000 | 4.900591000000 | 8.999469000000  |
| C | -5.317073000000 | 4.594572000000 | 10.062484000000 |
| C | -4.928415000000 | 3.675416000000 | 11.034550000000 |
| C | -2.290983000000 | 4.525766000000 | 7.716505000000  |
| C | -2.561942000000 | 5.750671000000 | 6.961795000000  |
| C | -2.786811000000 | 6.766105000000 | 6.345104000000  |
| H | -3.360375000000 | 2.348454000000 | 11.699702000000 |

|   |                 |                |                 |
|---|-----------------|----------------|-----------------|
| H | -1.858030000000 | 2.879137000000 | 9.804096000000  |
| H | -4.774209000000 | 5.614319000000 | 8.237215000000  |
| H | -6.291394000000 | 5.076679000000 | 10.127912000000 |
| H | -5.595323000000 | 3.435962000000 | 11.861460000000 |
| H | -2.362411000000 | 3.672475000000 | 7.026059000000  |
| H | -1.254784000000 | 4.558622000000 | 8.076835000000  |
| H | -2.975766000000 | 7.667237000000 | 5.800915000000  |

-----  
**Pr4F7**

|   |                 |                 |                 |
|---|-----------------|-----------------|-----------------|
| C | 7.341915000000  | 0.884577000000  | 2.426382000000  |
| C | 6.272445000000  | 0.045431000000  | 2.718728000000  |
| C | 5.395175000000  | 0.417438000000  | 3.729446000000  |
| C | 5.543937000000  | 1.590970000000  | 4.455152000000  |
| C | 6.615097000000  | 2.424734000000  | 4.152173000000  |
| C | 7.521430000000  | 2.082321000000  | 3.137113000000  |
| C | 8.619965000000  | 2.952580000000  | 2.822028000000  |
| C | 9.543416000000  | 3.687109000000  | 2.551757000000  |
| H | 8.043261000000  | 0.622420000000  | 1.637312000000  |
| H | 6.100618000000  | -0.876978000000 | 2.169541000000  |
| H | 4.810429000000  | 1.855296000000  | 5.214916000000  |
| H | 6.748641000000  | 3.357776000000  | 4.695517000000  |
| H | 10.361896000000 | 4.333944000000  | 2.315710000000  |
| F | 4.353530000000  | -0.388541000000 | 4.007972000000  |
| C | 3.149897000000  | 4.625087000000  | 4.355176000000  |
| C | 3.735166000000  | 4.218522000000  | 3.160036000000  |
| C | 3.398274000000  | 2.989568000000  | 2.581517000000  |
| C | 2.450076000000  | 2.182918000000  | 3.207473000000  |
| C | 1.860717000000  | 2.588881000000  | 4.407272000000  |
| C | 2.210781000000  | 3.805727000000  | 4.987438000000  |
| C | 4.134204000000  | 2.566731000000  | 1.321843000000  |
| C | 3.722243000000  | 1.275134000000  | 0.771731000000  |
| C | 3.368814000000  | 0.206392000000  | 0.330561000000  |
| H | 3.425428000000  | 5.581836000000  | 4.796920000000  |
| H | 4.480691000000  | 4.851761000000  | 2.676983000000  |
| H | 2.188333000000  | 1.221965000000  | 2.768432000000  |
| H | 1.127103000000  | 1.945527000000  | 4.890952000000  |
| H | 1.752776000000  | 4.119795000000  | 5.924137000000  |
| H | 5.210407000000  | 2.522720000000  | 1.548302000000  |
| H | 4.007644000000  | 3.337780000000  | 0.550251000000  |
| H | 3.060806000000  | -0.736098000000 | -0.070205000000 |

-----  
**Pr4F8**

|   |                |                 |                 |
|---|----------------|-----------------|-----------------|
| C | 5.975522000000 | 2.466205000000  | -0.590973000000 |
| C | 6.066901000000 | 3.737726000000  | -0.031094000000 |
| C | 5.908294000000 | 3.869362000000  | 1.342169000000  |
| C | 5.657019000000 | 2.786856000000  | 2.173802000000  |
| C | 5.561641000000 | 1.522961000000  | 1.602161000000  |
| C | 5.724398000000 | 1.349147000000  | 0.218983000000  |
| C | 5.638462000000 | 0.038830000000  | -0.362083000000 |
| C | 5.582535000000 | -1.065877000000 | -0.853615000000 |
| H | 6.097264000000 | 2.330792000000  | -1.663465000000 |
| H | 6.259668000000 | 4.618591000000  | -0.639383000000 |
| H | 5.502876000000 | 2.947064000000  | 3.239675000000  |
| H | 5.342336000000 | 0.658583000000  | 2.225305000000  |
| H | 5.534483000000 | -2.041036000000 | -1.289953000000 |
| F | 5.987330000000 | 5.100682000000  | 1.885673000000  |
| C | 3.004644000000 | 4.777923000000  | 4.036009000000  |
| C | 2.790995000000 | 4.397317000000  | 2.714546000000  |
| C | 2.532406000000 | 3.061856000000  | 2.388226000000  |
| C | 2.469337000000 | 2.115178000000  | 3.409504000000  |
| C | 2.680727000000 | 2.494574000000  | 4.737103000000  |
| C | 2.953917000000 | 3.823536000000  | 5.054577000000  |

|   |                |                 |                |
|---|----------------|-----------------|----------------|
| C | 2.378477000000 | 2.698100000000  | 0.921690000000 |
| C | 2.276894000000 | 1.264225000000  | 0.649629000000 |
| C | 2.215168000000 | 0.076969000000  | 0.431028000000 |
| H | 3.220950000000 | 5.818818000000  | 4.271799000000 |
| H | 2.855445000000 | 5.141782000000  | 1.919864000000 |
| H | 2.272715000000 | 1.073115000000  | 3.162339000000 |
| H | 2.633734000000 | 1.744896000000  | 5.525889000000 |
| H | 3.125509000000 | 4.116885000000  | 6.089063000000 |
| H | 3.247557000000 | 3.091128000000  | 0.373594000000 |
| H | 1.493627000000 | 3.203795000000  | 0.511718000000 |
| H | 2.171589000000 | -0.969496000000 | 0.215756000000 |

-----  
**Pr4F9**

|   |                |                 |                 |
|---|----------------|-----------------|-----------------|
| C | 6.188287000000 | 1.680361000000  | 1.567757000000  |
| C | 6.334285000000 | 1.729838000000  | 0.184149000000  |
| C | 6.521676000000 | 2.965724000000  | -0.416878000000 |
| C | 6.561696000000 | 4.151225000000  | 0.307464000000  |
| C | 6.416395000000 | 4.088841000000  | 1.689564000000  |
| C | 6.232594000000 | 2.854555000000  | 2.332296000000  |
| C | 6.078023000000 | 2.799048000000  | 3.758294000000  |
| C | 5.940942000000 | 2.755701000000  | 4.959630000000  |
| H | 6.021300000000 | 0.726954000000  | 2.064068000000  |
| H | 6.286021000000 | 0.832307000000  | -0.427689000000 |
| H | 6.705985000000 | 5.095670000000  | -0.212405000000 |
| H | 6.440975000000 | 4.999042000000  | 2.285153000000  |
| H | 5.807373000000 | 2.717509000000  | 6.019686000000  |
| F | 6.662615000000 | 3.023378000000  | -1.756157000000 |
| C | 2.837328000000 | 4.625484000000  | 4.261075000000  |
| C | 2.986959000000 | 4.291302000000  | 2.919298000000  |
| C | 2.834295000000 | 2.967506000000  | 2.490611000000  |
| C | 2.536933000000 | 1.982467000000  | 3.430188000000  |
| C | 2.383684000000 | 2.316283000000  | 4.777932000000  |
| C | 2.529823000000 | 3.635535000000  | 5.197187000000  |
| C | 2.980449000000 | 2.673259000000  | 1.007103000000  |
| C | 2.958564000000 | 1.253524000000  | 0.653399000000  |
| C | 2.928797000000 | 0.077933000000  | 0.371354000000  |
| H | 2.960437000000 | 5.659591000000  | 4.579916000000  |
| H | 3.228995000000 | 5.065322000000  | 2.189476000000  |
| H | 2.424806000000 | 0.948984000000  | 3.106883000000  |
| H | 2.148893000000 | 1.536784000000  | 5.501576000000  |
| H | 2.409632000000 | 3.894773000000  | 6.248137000000  |
| H | 3.920084000000 | 3.113087000000  | 0.645448000000  |
| H | 2.170539000000 | 3.178555000000  | 0.462839000000  |
| H | 2.897371000000 | -0.957674000000 | 0.106014000000  |

-----  
**Pr4F10**

|   |                |                 |                 |
|---|----------------|-----------------|-----------------|
| C | 2.313001000000 | -2.573297000000 | 0.296287000000  |
| C | 2.848828000000 | -2.709620000000 | 1.571569000000  |
| C | 2.440783000000 | -1.824270000000 | 2.560928000000  |
| C | 1.510378000000 | -0.822252000000 | 2.331679000000  |
| C | 0.978040000000 | -0.699947000000 | 1.052511000000  |
| C | 1.378753000000 | -1.563255000000 | 0.023785000000  |
| C | 0.852955000000 | -1.394953000000 | -1.302028000000 |
| C | 0.417061000000 | -1.238053000000 | -2.420657000000 |
| H | 2.623119000000 | -3.242695000000 | -0.503243000000 |
| H | 3.579065000000 | -3.480757000000 | 1.806985000000  |
| H | 1.233162000000 | -0.139703000000 | 3.133617000000  |
| H | 0.252724000000 | 0.083762000000  | 0.841439000000  |
| H | 0.028874000000 | -1.107896000000 | -3.408611000000 |
| F | 2.974986000000 | -1.943655000000 | 3.793145000000  |
| C | 1.003848000000 | 2.913365000000  | 3.273067000000  |
| C | 1.409413000000 | 2.688306000000  | 1.958357000000  |

|   |                |                 |                 |
|---|----------------|-----------------|-----------------|
| C | 2.656850000000 | 2.121219000000  | 1.684429000000  |
| C | 3.501918000000 | 1.797661000000  | 2.747070000000  |
| C | 3.101793000000 | 2.026892000000  | 4.063379000000  |
| C | 1.850164000000 | 2.580325000000  | 4.331723000000  |
| C | 3.053424000000 | 1.861818000000  | 0.241024000000  |
| C | 4.022909000000 | 0.776406000000  | 0.078614000000  |
| C | 4.831680000000 | -0.113333000000 | -0.044798000000 |
| H | 0.024189000000 | 3.345652000000  | 3.471908000000  |
| H | 0.739945000000 | 2.939908000000  | 1.134675000000  |
| H | 4.465621000000 | 1.333697000000  | 2.542423000000  |
| H | 3.765648000000 | 1.757575000000  | 4.883443000000  |
| H | 1.533124000000 | 2.748020000000  | 5.359712000000  |
| H | 3.471428000000 | 2.779381000000  | -0.196935000000 |
| H | 2.155462000000 | 1.615357000000  | -0.341284000000 |
| H | 5.538529000000 | -0.906665000000 | -0.164285000000 |

-----  
**Pr4F11**

|   |                 |                 |                 |
|---|-----------------|-----------------|-----------------|
| C | -0.089139000000 | 3.323030000000  | -4.556053000000 |
| C | -0.658083000000 | 3.054109000000  | -5.796279000000 |
| C | -1.040464000000 | 1.749221000000  | -6.077853000000 |
| C | -0.878147000000 | 0.710159000000  | -5.173103000000 |
| C | -0.307889000000 | 0.989723000000  | -3.935663000000 |
| C | 0.092051000000  | 2.295707000000  | -3.617024000000 |
| C | 0.668120000000  | 2.581800000000  | -2.332513000000 |
| C | 1.127224000000  | 2.829622000000  | -1.239987000000 |
| H | 0.221834000000  | 4.335247000000  | -4.305623000000 |
| H | -0.807199000000 | 3.833167000000  | -6.540605000000 |
| H | -1.201192000000 | -0.294561000000 | -5.436925000000 |
| H | -0.182747000000 | 0.196028000000  | -3.201481000000 |
| H | 1.514996000000  | 3.045194000000  | -0.266991000000 |
| C | -2.900736000000 | -0.897502000000 | -2.554978000000 |
| C | -3.016712000000 | 0.402726000000  | -2.068719000000 |
| C | -2.156107000000 | 0.872337000000  | -1.071585000000 |
| C | -1.177194000000 | 0.016585000000  | -0.564419000000 |
| C | -1.056732000000 | -1.285900000000 | -1.051634000000 |
| C | -1.916046000000 | -1.747352000000 | -2.048612000000 |
| C | -2.292473000000 | 2.312912000000  | -0.609756000000 |
| C | -1.639956000000 | 2.610675000000  | 0.666161000000  |
| C | -1.109091000000 | 2.843983000000  | 1.727267000000  |
| H | -3.579573000000 | -1.247707000000 | -3.331337000000 |
| H | -3.782138000000 | 1.065405000000  | -2.473767000000 |
| H | -0.505182000000 | 0.374892000000  | 0.213399000000  |
| H | -0.288930000000 | -1.943510000000 | -0.646951000000 |
| H | -1.824085000000 | -2.765394000000 | -2.423872000000 |
| H | -3.357410000000 | 2.564073000000  | -0.524282000000 |
| H | -1.868108000000 | 2.973156000000  | -1.380068000000 |
| H | -0.653721000000 | 3.062093000000  | 2.670034000000  |
| F | -1.594750000000 | 1.483728000000  | -7.278075000000 |

-----  
**Pr4F12**

|   |                 |                 |                |
|---|-----------------|-----------------|----------------|
| C | -3.215965000000 | -0.698566000000 | 2.720295000000 |
| C | -3.087626000000 | 0.686972000000  | 2.726845000000 |
| C | -4.226011000000 | 1.457473000000  | 2.913130000000 |
| C | -5.484008000000 | 0.901545000000  | 3.100547000000 |
| C | -5.601761000000 | -0.483522000000 | 3.086177000000 |
| C | -4.473327000000 | -1.293923000000 | 2.890538000000 |
| C | -4.608032000000 | -2.723203000000 | 2.851908000000 |
| C | -4.727831000000 | -3.927657000000 | 2.818838000000 |
| H | -2.340687000000 | -1.327030000000 | 2.564777000000 |
| H | -2.122283000000 | 1.169825000000  | 2.588773000000 |
| H | -6.344721000000 | 1.550528000000  | 3.245211000000 |
| H | -6.574959000000 | -0.950743000000 | 3.222639000000 |

|   |                 |                 |                 |
|---|-----------------|-----------------|-----------------|
| H | -4.832540000000 | -4.991681000000 | 2.799248000000  |
| C | -0.108506000000 | -1.636535000000 | 0.587016000000  |
| C | -0.880824000000 | -0.593266000000 | 0.078226000000  |
| C | -2.206934000000 | -0.810259000000 | -0.305286000000 |
| C | -2.747143000000 | -2.091614000000 | -0.185686000000 |
| C | -1.975320000000 | -3.138250000000 | 0.318081000000  |
| C | -0.655824000000 | -2.914523000000 | 0.709814000000  |
| C | -3.027515000000 | 0.355539000000  | -0.829552000000 |
| C | -4.465715000000 | 0.223877000000  | -0.585606000000 |
| C | -5.649942000000 | 0.094264000000  | -0.381201000000 |
| H | 0.919878000000  | -1.450469000000 | 0.893341000000  |
| H | -0.452862000000 | 0.406559000000  | -0.004559000000 |
| H | -3.790073000000 | -2.262428000000 | -0.448982000000 |
| H | -2.416900000000 | -4.127526000000 | 0.425306000000  |
| H | -0.058036000000 | -3.729076000000 | 1.115365000000  |
| H | -2.859492000000 | 0.469155000000  | -1.910015000000 |
| H | -2.675947000000 | 1.281905000000  | -0.357001000000 |
| H | -6.698216000000 | -0.010183000000 | -0.198334000000 |
| F | -4.105774000000 | 2.800739000000  | 2.913941000000  |

-----  
**Pr4F13**

|   |                 |                 |                 |
|---|-----------------|-----------------|-----------------|
| C | 3.041037000000  | 0.724162000000  | 3.055656000000  |
| C | 4.349963000000  | 0.261692000000  | 2.970264000000  |
| C | 4.732359000000  | -0.430841000000 | 1.829282000000  |
| C | 3.862257000000  | -0.676400000000 | 0.776629000000  |
| C | 2.556246000000  | -0.207700000000 | 0.871626000000  |
| C | 2.134149000000  | 0.494343000000  | 2.010044000000  |
| C | 0.780863000000  | 0.966088000000  | 2.109346000000  |
| C | -0.360339000000 | 1.360554000000  | 2.204057000000  |
| H | 2.711100000000  | 1.268749000000  | 3.937916000000  |
| H | 5.070565000000  | 0.427845000000  | 3.767939000000  |
| H | 4.207148000000  | -1.227945000000 | -0.095370000000 |
| H | 1.853165000000  | -0.394714000000 | 0.062739000000  |
| H | -1.380638000000 | 1.676544000000  | 2.274610000000  |
| F | 5.999723000000  | -0.883394000000 | 1.742781000000  |
| C | 1.067526000000  | -2.434475000000 | -1.653475000000 |
| C | 0.120253000000  | -1.411939000000 | -1.698127000000 |
| C | -0.672220000000 | -1.124107000000 | -0.582065000000 |
| C | -0.506816000000 | -1.879617000000 | 0.580242000000  |
| C | 0.442666000000  | -2.900567000000 | 0.627707000000  |
| C | 1.232389000000  | -3.181671000000 | -0.486605000000 |
| C | -1.644675000000 | 0.040265000000  | -0.655558000000 |
| C | -2.732928000000 | -0.009249000000 | 0.322792000000  |
| C | -3.630739000000 | -0.056179000000 | 1.131442000000  |
| H | 1.673746000000  | -2.649653000000 | -2.532241000000 |
| H | -0.005616000000 | -0.830335000000 | -2.611854000000 |
| H | -1.117878000000 | -1.658428000000 | 1.453507000000  |
| H | 0.567866000000  | -3.476989000000 | 1.542818000000  |
| H | 1.972827000000  | -3.978909000000 | -0.446587000000 |
| H | -2.079668000000 | 0.086067000000  | -1.661878000000 |
| H | -1.084900000000 | 0.975238000000  | -0.505462000000 |
| H | -4.433101000000 | -0.098363000000 | 1.837506000000  |

-----  
**Pr4F14**

|   |                 |                 |                |
|---|-----------------|-----------------|----------------|
| C | -3.060754000000 | 0.913118000000  | 3.383123000000 |
| C | -4.429931000000 | 0.711256000000  | 3.514661000000 |
| C | -5.035538000000 | -0.240532000000 | 2.707478000000 |
| C | -4.330621000000 | -1.001967000000 | 1.786078000000 |
| C | -2.962226000000 | -0.790162000000 | 1.662144000000 |
| C | -2.316272000000 | 0.169786000000  | 2.455301000000 |
| C | -0.905360000000 | 0.392315000000  | 2.309452000000 |
| C | 0.279807000000  | 0.587940000000  | 2.159780000000 |

|   |                 |                 |                 |
|---|-----------------|-----------------|-----------------|
| H | -2.556730000000 | 1.654505000000  | 3.999950000000  |
| H | -5.029170000000 | 1.282791000000  | 4.219648000000  |
| H | -4.855057000000 | -1.736566000000 | 1.179126000000  |
| H | -2.379396000000 | -1.360897000000 | 0.942353000000  |
| H | 1.326677000000  | 0.753888000000  | 2.018727000000  |
| C | 0.709119000000  | 1.538611000000  | -1.533349000000 |
| C | -0.136207000000 | 2.361908000000  | -0.796453000000 |
| C | -1.474246000000 | 2.010323000000  | -0.589230000000 |
| C | -1.957194000000 | 0.828445000000  | -1.147123000000 |
| C | -1.109537000000 | -0.002508000000 | -1.883527000000 |
| C | 0.224754000000  | 0.345793000000  | -2.075320000000 |
| C | -2.331288000000 | 2.916871000000  | 0.276561000000  |
| C | -3.748657000000 | 2.557451000000  | 0.332822000000  |
| C | -4.917814000000 | 2.252051000000  | 0.371035000000  |
| H | 1.748746000000  | 1.825456000000  | -1.686683000000 |
| H | 0.248168000000  | 3.286766000000  | -0.364247000000 |
| H | -3.001112000000 | 0.556135000000  | -0.998653000000 |
| H | -1.497942000000 | -0.925390000000 | -2.312767000000 |
| H | 0.884481000000  | -0.302239000000 | -2.650265000000 |
| H | -2.241667000000 | 3.950533000000  | -0.082715000000 |
| H | -1.924302000000 | 2.902113000000  | 1.298813000000  |
| H | -5.953611000000 | 1.988901000000  | 0.418621000000  |
| F | -6.367553000000 | -0.426942000000 | 2.815222000000  |
